# Supplementary material for: Base promoted regio- and stereoselective hydrophosphinylation of allenes
Source: Royal Society of Chemistry journal article supplement (doi:10.1039/d4ob01845a), 2024-12-11

## Supporting Information

### Base Promoted Regio- and Stereoselective Hydrophosphinylation of Allenenes

Fei-Min Zhu,<sup>a</sup> Jia-Jie Pu,<sup>b</sup> Zhen-Qiang Zhang,<sup>\*c</sup> and Zhuang-Ping Zhan<sup>\*a,b</sup>

<sup>a</sup> Department of Chemistry, College of Chemistry and Chemical Engineering, Xiamen University, Xiamen 361001 Fujian, People's Republic of China; Email: zpzh@xmu.edu.cn.

<sup>b</sup> Gulei Innovation Institute, Xiamen University, Zhangzhou 363100 Fujian, People's Republic of China.

<sup>c</sup> Yunnan Precious Metals Laboratory Company, Ltd., Kunming 650106 Yunnan, People's Republic of China; Email: zhenqiang.zhang@163.com.

## *Table of Contents*

|    |                                                                |    |
|----|----------------------------------------------------------------|----|
| 1. | General information .....                                      | 1  |
| 2. | Preparation of allenes.....                                    | 1  |
| 3. | General procedure for the hydrophosphinylation of allenes..... | 2  |
| 4. | Optimization of reaction conditions.....                       | 2  |
| 5. | Analytical data for compounds .....                            | 4  |
| 6. | Procedure of Gram-Scale Experiment .....                       | 12 |
| 7. | Preliminary mechanistic studies .....                          | 12 |
| 8. | References.....                                                | 13 |
| 9. | NMR spectra .....                                              | 14 |

## 1. General information

The reactions were carried out in 10 mL Schlenk tubes under N<sub>2</sub>. Unless otherwise noted, all reagents and solvents were obtained commercially and used without further purification. All of the allene substrates are known compounds and were prepared according to the previously reported methods. SPOs were purchased from Bidepharm. Reactions were monitored by thin layer chromatography (TLC) using silicycle precoated silica gel plates. Column chromatography was performed over silica gel (300-400 mesh). NMR spectra were recorded on a ZK-400 spectrometer or a Bruker AV-500 spectrometer, using CDCl<sub>3</sub> as the solvent. Chemical shifts are reported in parts per million with the internal TMS signal at 0.0 ppm as a standard, referenced to the residual signal of CDCl<sub>3</sub> (7.26 ppm for <sup>1</sup>H, 77.16 ppm for <sup>13</sup>C). The following abbreviations were used for the descriptions of splitting patterns: s = singlet, d = doublet, t = triplet, q = quartet and m = multiplet. Mass spectra were recorded with an Agilent 1290-6545XT ultra-high-performance liquid chromatography-quadrupole time-of-flight mass spectrometer using electrospray ionization.

## 2. Preparation of allenes

### General Procedure A: Synthesis of allenes from alkyne

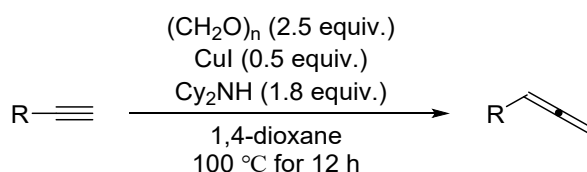

According to literature procedures,<sup>[S1]</sup> the corresponding aryl alkyne (10 mmol, 1.0 equiv.), paraformaldehyde (0.75 g, 25 mmol, 2.5 equiv.), CuI (0.95 g, 5.0 mmol, 0.5 equiv.) and dicyclohexylamine (3.6 mL, 18 mmol, 1.8 equiv.) were dissolved in 1,4-dioxane (50 mL) under nitrogen, and the reaction mixture was placed in an oil bath and heated for 12 hours at 100 °C. The reaction was monitored by TLC (pure Hexane). After the disappearance of the starting material, the reaction was quenched with H<sub>2</sub>O (20 mL), followed by the addition of Et<sub>2</sub>O (20 mL). The organic layer was separated, and the aqueous layer was extracted with Et<sub>2</sub>O (3 × 20 mL). The gathered organic layers were dried over MgSO<sub>4</sub>, and the solvents were evaporated under vacuum. The allene was obtained by purification on silica gel column chromatography.

The substrate **1a-k**,<sup>[S1, S2]</sup> and **1l**<sup>[S3]</sup> in Table 2 was prepared according to the procedures described in the literature reported before.

### General Procedure B: Synthesis of allene **1m**

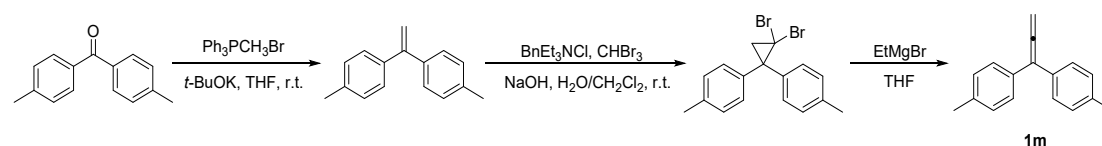

The substrate **1m** in Table 2 was prepared according to the procedures described in the literature reported before.<sup>[S4]</sup>

Step 1: Methyl triphenylphosphonium bromide (6.43 g, 18 mmol, 1.2 equiv.) was added to a dried flask followed by THF (40 mL). Then *t*-BuOK (22.5 mL, 22.5 mmol, 1.5 equiv.) was added dropwise to the solution under ice-bath and the resulting yellow suspension was stirred at room temperature for 30 min. To this suspension, a solution of 4,4'-Dimethylbenzophenone (15 mmol, 1.0 equiv.) was added and the resulting mixture was further stirred at room temperature overnight. Upon completion, water and DCM were added to the reaction mixture, and the aqueous phase was extracted with DCM. The combined organic phases were washed with brine, dried over anhydrous MgSO<sub>4</sub> and the solvent was removed under reduced pressure. The reaction mixture was purified by column chromatography over silica gel using hexanes as eluent to afford 4,4'-(ethene-1,1-diyl)bis(methylbenzene).

Step 2: To a solution of 4,4'-(ethene-1,1-diyl)bis(methylbenzene) (10 mmol, 1.0 equiv.), bromoform (6.33 g, 25 mmol, 2.5 equiv.), BnNEt<sub>3</sub>Cl (228 mg, 1 mmol, 10 mol %) and a solution of 50% NaOH (250 mmol, 25 equiv.) were added, and the mixture was stirred at room temperature overnight. Upon completion, water and DCM were added, and the aqueous phase was extracted with DCM. The combined organic phases were washed with brine, dried over anhydrous MgSO<sub>4</sub> and the solvent removed under reduced pressure. The reaction mixture was purified by column chromatography to afford 1,1'-(2,2-Dibromocyclopropylidene)bis[4-methylbenzene].

Step 3: To a pre-cooled (ice-bath) solution of 1,1'-(2,2-Dibromocyclopropylidene)bis[4-methylbenzene] (1.0 equiv.) in dry THF (1.0 mL/mmol), EtMgBr (3.0 M in THF, 1.5 equiv.) was added dropwise. The mixture was then slowly warmed to room temperature and stirred at room temperature for an additional 3 hours. Then the reaction was quenched by water and the mixture was extracted with DCM. The combined organic layers were washed with brine, and dried with anhydrous MgSO<sub>4</sub>. After removing the solvent under reduced pressure, the crude product was purified by column chromatography on silica gel to afford allene **1m**.

### 3. General procedure for the hydrophosphinylation of allenes

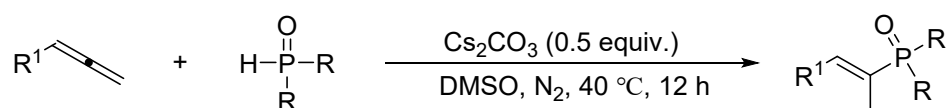

To an oven dried Schlenk tube (10 mL) with a magnetic stir bar, allenes (0.4 mmol, 2 equiv., if solid), phosphine oxides (0.2 mmol, 1 equiv.) and Cs<sub>2</sub>CO<sub>3</sub> (0.1 mmol, 0.5 equiv.) were added. The Schlenk tube was sealed and degassed via vacuum evacuation and subsequent backfilled with N<sub>2</sub> for three times. Subsequently, allenes (0.4 mmol, if liquid) and anhydrous DMSO (2 mL) were added. Then the reaction mixture was placed in an oil bath and heated for 12 hours at 40 °C. Upon completion, water and EtOAc were added to the reaction mixture, and the aqueous phase was extracted with EtOAc. The combined organic layers were dried over anhydrous MgSO<sub>4</sub> and concentrated under reduced pressure. The crude product was purified by column chromatography isolation on silica gel (petroleum ether: ethyl acetate = 2:1 v/v) to give the pure desired product.

## 4. Optimization of reaction conditions

**Table S1. Base optimization<sup>a</sup>**

| <b>1a</b>       | <b>2a</b>                       |                        | <b>3a</b> |
|-----------------|---------------------------------|------------------------|-----------|
| Entry           | Base                            | Yield <sup>b</sup> (%) |           |
| 1               | <i>t</i> -BuOK                  | 9                      |           |
| 2               | <i>t</i> -BuONa                 | 30                     |           |
| 3               | <i>t</i> -BuOLi                 | 16                     |           |
| 4               | KOH                             | 61                     |           |
| 5               | NaOH                            | 55                     |           |
| 6               | Cs <sub>2</sub> CO <sub>3</sub> | 81                     |           |
| 7               | Rb <sub>2</sub> CO <sub>3</sub> | 64                     |           |
| 8               | K <sub>2</sub> CO <sub>3</sub>  | 20                     |           |
| 9               | Na <sub>2</sub> CO <sub>3</sub> | N.D.                   |           |
| 10              | CsF                             | 26                     |           |
| 11              | DBU                             | 8                      |           |
| 12 <sup>c</sup> | Cs <sub>2</sub> CO <sub>3</sub> | 20                     |           |
| 13              | /                               | N.D.                   |           |
| 14 <sup>d</sup> | Cs <sub>2</sub> CO <sub>3</sub> | 82                     |           |
| 15 <sup>e</sup> | Cs <sub>2</sub> CO <sub>3</sub> | 56                     |           |

<sup>a</sup>Reaction condition: phenyl allene **1a** (0.40 mmol), SPO **2a** (0.20 mmol), base (0.10 mmol, 0.5 equiv.), DMSO (2 mL), 40 °C, 12 h, N<sub>2</sub> atmosphere. <sup>b</sup>Yield was determined by <sup>1</sup>H NMR analysis using 1,3,5-trimethoxy-benzene as an internal standard. <sup>c</sup>Phenyl allene **1a** (0.20 mmol), SPO **2a** (0.40 mmol). <sup>d</sup>Base (1.0 equiv.). <sup>e</sup>Base (0.3 equiv.). N.D.: not detected.

**Table S2. Reaction temperature optimization<sup>a</sup>**

| <b>1a</b> | <b>2a</b>   |                        | <b>3a</b> |
|-----------|-------------|------------------------|-----------|
| Entry     | Temperature | Yield <sup>b</sup> (%) |           |
| 1         | 40 °C       | 81                     |           |
| 2         | 60 °C       | 66                     |           |
| 3         | 50 °C       | 73                     |           |
| 4         | r.t.        | 72                     |           |

<sup>a</sup>Reaction condition: phenyl allene **1a** (0.40 mmol), SPO **2a** (0.20 mmol), Cs<sub>2</sub>CO<sub>3</sub> (0.10 mmol, 0.5 equiv.), DMSO (2 mL), 12 h, N<sub>2</sub> atmosphere. <sup>b</sup>Yield was determined by <sup>1</sup>H NMR analysis using 1,3,5-trimethoxy-benzene as an internal standard.

**Table S3. Solvent optimization<sup>a</sup>**

|           |   |           |                                                                                                                  |           |
|-----------|---|-----------|------------------------------------------------------------------------------------------------------------------|-----------|
|           | + |           | $\xrightarrow[\text{Solvent (2 mL), N}_2, 40\text{ }^\circ\text{C}]{\text{Cs}_2\text{CO}_3\text{ (0.5 equiv.)}}$ |           |
| <b>1a</b> |   | <b>2a</b> |                                                                                                                  | <b>3a</b> |

  

| Entry | Solvent     | Yield <sup>b</sup> (%) |
|-------|-------------|------------------------|
| 1     | DMF         | 74                     |
| 2     | DMSO        | 81                     |
| 3     | DMA         | 65                     |
| 4     | THF         | 30                     |
| 5     | DCM         | N.D.                   |
| 6     | MeCN        | 35                     |
| 7     | Toluene     | trace                  |
| 8     | 1,4-Dioxane | 8                      |

<sup>a</sup>Reaction condition: phenyl allene **1a** (0.40 mmol), SPO **2a** (0.20 mmol), Cs<sub>2</sub>CO<sub>3</sub> (0.10 mmol, 0.5 equiv.), solvent (2 mL), 12 h, N<sub>2</sub> atmosphere, 40 °C. <sup>b</sup>Yield was determined by <sup>1</sup>H NMR analysis using 1,3,5-trimethoxy-benzene as an internal standard. N.D.: not detected.

## 5. Analytical data for compounds

(*E*)-diphenyl(1-phenylprop-1-en-2-yl)phosphine oxide (**3a**)

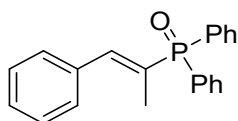

Prepared following the general procedure, purified by column chromatography (2/1 petroleum ether/ ethyl acetate), and isolated as white solid (48mg, 75%, mp 129-130 °C). <sup>1</sup>H NMR (400 MHz, CDCl<sub>3</sub>) δ 7.78-7.72 (m, 4H), 7.56-7.43 (m, 6H), 7.37-7.26 (m, 5H), 7.22 (d, *J* = 21.9, 1H), 2.10 (d, *J* = 13.8, 3H); <sup>13</sup>C NMR (100 MHz, CDCl<sub>3</sub>) δ 142.7 (d, *J* = 10.8 Hz), 135.8 (d, *J* = 18.8 Hz), 132.1 (d, *J* = 9.6 Hz), 131.9 (d, *J* = 2.9 Hz), 131.3 (d, *J* = 102.1 Hz), 130.3 (d, *J* = 96.4 Hz), 129.4, 128.6 (d, *J* = 11.9 Hz), 128.5, 128.4, 15.1 (d, *J* = 10.8 Hz); <sup>31</sup>P NMR (162 MHz, CDCl<sub>3</sub>) δ 33.39; HRMS (ESI) *m/z* [M+H]<sup>+</sup> calcd for [C<sub>21</sub>H<sub>20</sub>OP]<sup>+</sup> 319.1246, found 319.1243.

(*E*)-diphenyl(1-(*p*-tolyl)prop-1-en-2-yl)phosphine oxide (**3b**)

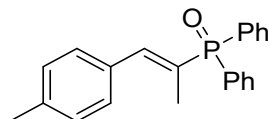

Prepared following the general procedure, purified by column chromatography (2/1 petroleum ether/ ethyl acetate), and isolated as a colorless oil (45mg, 68%). <sup>1</sup>H NMR (400 MHz, CDCl<sub>3</sub>) δ 7.80-7.73 (m, 4H), 7.57-7.53 (m, 2H), 7.51-7.45 (m, 4H), 7.31-7.28 (m, 2H), 7.24-7.16 (m, 3H), 2.36 (s, 3H), 2.13 (d, *J* = 13.8 Hz, 3H); <sup>13</sup>C NMR (100 MHz, CDCl<sub>3</sub>) δ 142.7 (d, *J* = 10.9 Hz), 138.5, 132.9 (d, *J* = 19.2 Hz), 132.0 (d, *J* = 9.6 Hz), 131.9 (d, *J* = 2.8 Hz), 131.3 (d, *J* = 102.3 Hz), 129.5, 129.1, 129.0 (d, *J* = 96.8 Hz), 128.6 (d, *J* = 11.9 Hz), 21.3, 15.1 (d, *J* = 10.8

Hz);  $^{31}\text{P}$  NMR (162 MHz,  $\text{CDCl}_3$ )  $\delta$  33.70; HRMS (ESI)  $m/z$   $[\text{M}+\text{H}]^+$  calcd for  $[\text{C}_{22}\text{H}_{22}\text{OP}]^+$  333.1403, found 333.1407.

(*E*)-diphenyl(1-(*m*-tolyl)prop-1-en-2-yl)phosphine oxide (**3c**)

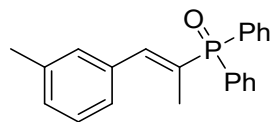

Prepared following the general procedure, purified by column chromatography (2/1 petroleum ether/ ethyl acetate), and isolated as a colorless oil (38 mg, 58%).  $^1\text{H}$  NMR (500 MHz,  $\text{CDCl}_3$ )  $\delta$  7.78-7.73 (m, 4H), 7.57-7.54 (m, 2H), 7.51-7.47 (m, 4H), 7.29-7.24 (m, 1H), 7.20-7.11 (m, 4H), 2.35 (s, 3H), 2.11 (d,  $J$  = 13.8 Hz, 3H);  $^{13}\text{C}$  NMR (100 MHz,  $\text{CDCl}_3$ )  $\delta$  142.9 (d,  $J$  = 10.9 Hz), 138.1, 135.8 (d,  $J$  = 19.0 Hz), 132.1 (d,  $J$  = 9.8 Hz), 132.0 (d,  $J$  = 2.7 Hz), 131.3 (d,  $J$  = 102.2 Hz), 130.2, 130.0 (d,  $J$  = 97.3 Hz), 129.2, 128.6 (d,  $J$  = 11.8 Hz), 128.3, 126.5, 21.5, 15.1 (d,  $J$  = 10.9 Hz);  $^{31}\text{P}$  NMR (202 MHz,  $\text{CDCl}_3$ )  $\delta$  33.58; HRMS (ESI)  $m/z$   $[\text{M}+\text{H}]^+$  calcd for  $[\text{C}_{22}\text{H}_{22}\text{OP}]^+$  333.1403, found 333.1408.

(*E*)-diphenyl(1-(*o*-tolyl)prop-1-en-2-yl)phosphine oxide (**3d**)

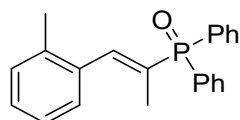

Prepared following the general procedure, purified by column chromatography (2/1 petroleum ether/ ethyl acetate), and isolated as a colorless oil (39 mg, 59%).  $^1\text{H}$  NMR (400 MHz,  $\text{CDCl}_3$ )  $\delta$  7.81-7.73 (m, 4H), 7.59-7.47 (m, 6H), 7.25-7.17 (m, 4H), 7.13 (d,  $J$  = 22.2 Hz, 1H), 2.17 (s, 3H), 1.98 (d,  $J$  = 15.0 Hz, 3H);  $^{13}\text{C}$  NMR (100 MHz,  $\text{CDCl}_3$ )  $\delta$  142.6 (d,  $J$  = 11.5 Hz), 136.7, 135.0 (d,  $J$  = 17.8 Hz), 132.1 (d,  $J$  = 9.6 Hz), 132.1 (d,  $J$  = 2.5 Hz), 131.4 (d,  $J$  = 96.0 Hz), 131.3 (d,  $J$  = 102.6 Hz), 130.3, 128.7 (d,  $J$  = 12.1 Hz), 128.7, 128.4, 125.7, 20.0, 14.6 (d,  $J$  = 10.9 Hz);  $^{31}\text{P}$  NMR (162 MHz,  $\text{CDCl}_3$ )  $\delta$  33.68; HRMS (ESI)  $m/z$   $[\text{M}+\text{H}]^+$  calcd for  $[\text{C}_{22}\text{H}_{22}\text{OP}]^+$  333.1403, found 333.1405.

(*E*)-(1-(4-methoxyphenyl)prop-1-en-2-yl)diphenylphosphine oxide (**3e**)

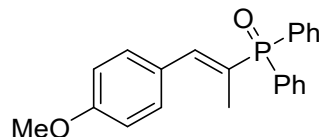

Prepared following the general procedure, purified by column chromatography (2/1 petroleum ether/ ethyl acetate), and isolated as a colorless oil (44 mg, 63%).  $^1\text{H}$  NMR (400 MHz,  $\text{CDCl}_3$ )  $\delta$  7.78-7.71 (m, 4H), 7.57-7.52 (m, 2H), 7.50-7.43 (m, 4H), 7.34 (d,  $J$  = 8.4 Hz, 2H), 7.15 (d,  $J$  = 22.2 Hz, 1H), 6.90 (d,  $J$  = 8.9 Hz, 2H), 3.81 (s, 3H), 2.11 (d,  $J$  = 13.8 Hz, 3H);  $^{13}\text{C}$  NMR (100 MHz,  $\text{CDCl}_3$ )  $\delta$  159.8, 142.4 (d,  $J$  = 11.0 Hz), 132.2 (d,  $J$  = 9.4 Hz), 132.0 (d,  $J$  = 2.7 Hz), 131.6 (d,  $J$  = 102.6 Hz), 131.3, 128.7 (d,  $J$  = 11.9 Hz), 128.6 (d,  $J$  = 19.6 Hz), 127.5 (d,  $J$  = 98.7 Hz), 113.9, 55.4, 15.3 (d,  $J$  = 11.0 Hz);  $^{31}\text{P}$  NMR (162 MHz,  $\text{CDCl}_3$ )  $\delta$  33.91; HRMS (ESI)  $m/z$   $[\text{M}+\text{H}]^+$  calcd for  $[\text{C}_{22}\text{H}_{22}\text{O}_2\text{P}]^+$  349.1352, found 349.1349.

(*E*)-diphenyl(1-(4-(trifluoromethyl)phenyl)prop-1-en-2-yl)phosphine oxide (**3f**)

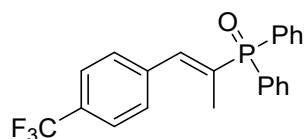

Prepared following the general procedure, purified by column chromatography (2/1 petroleum ether/ ethyl acetate), and isolated as a colorless oil (56 mg, 72%).  $^1\text{H}$  NMR (400 MHz,  $\text{CDCl}_3$ )  $\delta$  7.79-7.71 (m, 4H), 7.65-7.61 (m, 2H), 7.60-7.55 (m, 2H), 7.53-7.44 (m, 6H), 7.29 (d,  $J$  = 21.6 Hz, 1H), 2.09 (d,  $J$  = 13.7 Hz, 3H);  $^{13}\text{C}$  NMR (100 MHz,  $\text{CDCl}_3$ )  $\delta$  141.1 (d,  $J$  = 10.7 Hz), 139.3 (d,  $J$  = 18.8 Hz), 133.2 (d,  $J$  = 95.1 Hz), 132.2 (d,  $J$  = 2.8 Hz), 132.1 (d,  $J$  = 9.7 Hz), 130.8 (d,  $J$  = 102.6 Hz), 130.1 (q,  $J$  = 32.4 Hz), 129.6, 128.8 (d,  $J$  = 11.9 Hz), 125.4 (q,  $J$  = 3.7 Hz), 124.0 (q,  $J$  = 272.7 Hz), 15.2 (d,  $J$  = 10.6 Hz);  $^{31}\text{P}$  NMR (162 MHz,  $\text{CDCl}_3$ )  $\delta$  32.58;  $^{19}\text{F}$  NMR (376 MHz,  $\text{CDCl}_3$ )  $\delta$  -62.65; HRMS (ESI)  $m/z$   $[\text{M}+\text{H}]^+$  calcd for  $[\text{C}_{22}\text{H}_{19}\text{F}_3\text{OP}]^+$  387.1120, found 387.1125.

(*E*)-(1-(4-fluorophenyl)prop-1-en-2-yl)diphenylphosphine oxide (**3g**)

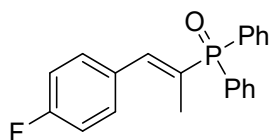

Prepared following the general procedure, purified by column chromatography (2/1 petroleum ether/ ethyl acetate), and isolated as a colorless oil (36 mg, 57%).  $^1\text{H}$  NMR (400 MHz,  $\text{CDCl}_3$ )  $\delta$  7.77-7.71 (m, 4H), 7.58-7.54 (m, 2H), 7.52-7.46 (m, 4H), 7.39-7.33 (m, 2H), 7.19 (d,  $J$  = 21.7 Hz, 1H), 7.06 (t,  $J$  = 8.6 Hz, 2H), 2.08 (d,  $J$  = 13.8 Hz, 3H);  $^{13}\text{C}$  NMR (100 MHz,  $\text{CDCl}_3$ )  $\delta$  162.5 (d,  $J$  = 249.2 Hz), 141.6 (d,  $J$  = 10.9 Hz), 132.1 (d,  $J$  = 9.6 Hz), 132.1 (d,  $J$  = 2.7 Hz), 131.9 (dd,  $J$  = 18.8, 3.5 Hz), 131.4 (d,  $J$  = 8.3 Hz), 131.1 (d,  $J$  = 102.4 Hz), 130.0 (d,  $J$  = 97.1 Hz), 128.7 (d,  $J$  = 11.9 Hz), 115.5 (d,  $J$  = 21.5 Hz), 15.1 (d,  $J$  = 10.9 Hz);  $^{31}\text{P}$  NMR (162 MHz,  $\text{CDCl}_3$ )  $\delta$  33.24;  $^{19}\text{F}$  NMR (376 MHz,  $\text{CDCl}_3$ )  $\delta$  -112.11; HRMS (ESI)  $m/z$   $[\text{M}+\text{H}]^+$  calcd for  $[\text{C}_{21}\text{H}_{19}\text{FOP}]^+$  337.1152, found 337.1158.

(*E*)-(1-(4-chlorophenyl)prop-1-en-2-yl)diphenylphosphine oxide (**3h**)

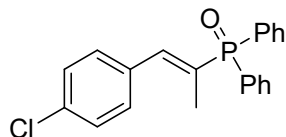

Prepared following the general procedure, purified by column chromatography (2/1 petroleum ether/ ethyl acetate), and isolated as a colorless oil (45 mg, 64%).  $^1\text{H}$  NMR (500 MHz,  $\text{CDCl}_3$ )  $\delta$  7.77-7.70 (m, 4H), 7.59-7.53 (m, 2H), 7.51-7.46 (m, 4H), 7.36-7.32 (m, 2H), 7.31-7.27 (m, 2H), 7.19 (d,  $J$  = 21.6 Hz, 1H), 2.07 (d,  $J$  = 13.9 Hz, 3H);  $^{13}\text{C}$  NMR (100 MHz,  $\text{CDCl}_3$ )  $\delta$  141.3 (d,  $J$  = 10.8 Hz), 134.2, 134.1 (d,  $J$  = 18.2 Hz), 132.1, 132.0 (d,  $J$  = 9.6 Hz), 131.0 (d,  $J$  = 96.9 Hz), 130.9 (d,  $J$  = 102.9 Hz), 130.7, 128.7 (d,  $J$  = 11.8 Hz), 128.6 (d,  $J$  = 2.6 Hz), 15.1 (d,  $J$  = 10.7 Hz);  $^{31}\text{P}$  NMR (202 MHz,  $\text{CDCl}_3$ )  $\delta$  32.97. HRMS (ESI)  $m/z$   $[\text{M}+\text{H}]^+$  calcd for  $[\text{C}_{21}\text{H}_{19}\text{ClOP}]^+$  353.0857, found 353.0853.



(*E*)-(1-(3-chlorophenyl)prop-1-en-2-yl)diphenylphosphine oxide (**3i**)

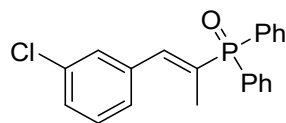

Prepared following the general procedure, purified by column chromatography (2/1 petroleum ether/ ethyl acetate), and isolated as a colorless oil (49 mg, 70%). <sup>1</sup>H NMR (500 MHz, CDCl<sub>3</sub>) δ 7.72-7.63 (m, 4H), 7.52-7.46 (m, 2H), 7.45-7.40 (m, 4H), 7.27-7.14 (m, 4H), 7.09 (d, *J* = 21.5 Hz, 1H), 2.01 (d, *J* = 13.7 Hz, 3H); <sup>13</sup>C NMR (125 MHz, CDCl<sub>3</sub>) δ 141.2 (d, *J* = 11.0 Hz), 137.7 (d, *J* = 19.0 Hz), 134.5, 132.4 (d, *J* = 95.7 Hz), 132.2 (d, *J* = 9.8 Hz), 132.1 (d, *J* = 2.8 Hz), 131.1 (d, *J* = 102.3 Hz), 129.8, 129.3, 128.8 (d, *J* = 11.9 Hz), 128.5, 127.6, 15.2 (d, *J* = 10.8 Hz); <sup>31</sup>P NMR (202 MHz, CDCl<sub>3</sub>) δ 32.85; HRMS (ESI) *m/z* [M+H]<sup>+</sup> calcd for [C<sub>21</sub>H<sub>19</sub>ClOP]<sup>+</sup> 353.0857, found 353.0860.

(*E*)-(1-(2-chlorophenyl)prop-1-en-2-yl)diphenylphosphine oxide (**3j**)

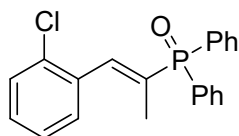

Prepared following the general procedure, purified by column chromatography (2/1 petroleum ether/ ethyl acetate), and isolated as a colorless oil (39 mg, 55%). <sup>1</sup>H NMR (400 MHz, CDCl<sub>3</sub>) δ 7.88-7.79 (m, 4H), 7.64-7.49 (m, 6H), 7.45-7.41 (m, 1H), 7.35-7.25 (m, 3H), 7.10 (d, *J* = 21.6 Hz, 1H), 2.03 (d, *J* = 13.1 Hz, 3H); <sup>13</sup>C NMR (100 MHz, CDCl<sub>3</sub>) δ 140.2 (d, *J* = 13.3 Hz), 134.4 (d, *J* = 19.0 Hz), 133.8, 133.5 (d, *J* = 95.9 Hz), 132.2 (d, *J* = 9.6 Hz), 132.1 (d, *J* = 2.4 Hz), 131.0 (d, *J* = 102.4 Hz), 130.2, 129.7, 129.5, 128.8 (d, *J* = 12.0 Hz), 126.6, 14.5 (d, *J* = 10.4 Hz); <sup>31</sup>P NMR (162 MHz, CDCl<sub>3</sub>) δ 33.82; HRMS (ESI) *m/z* [M+H]<sup>+</sup> calcd for [C<sub>21</sub>H<sub>19</sub>ClOP]<sup>+</sup> 353.0857, found 353.0854.

(*E*)-(1-(naphthalen-2-yl)prop-1-en-2-yl)diphenylphosphine oxide (**3k**)

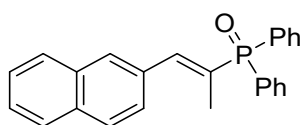

Prepared following the general procedure, purified by column chromatography (2/1 petroleum ether/ ethyl acetate), and isolated as a colorless oil (46 mg, 62 %). <sup>1</sup>H NMR (400 MHz, CDCl<sub>3</sub>) δ 7.84-7.77 (m, 8H), 7.60-7.55 (m, 2H), 7.54-7.46 (m, 7H), 7.38 (d, *J* = 21.9 Hz, 1H), 2.20 (d, *J* = 13.9 Hz, 3H); <sup>13</sup>C NMR (100 MHz, CDCl<sub>3</sub>) δ 142.8 (d, *J* = 10.9 Hz), 133.4 (d, *J* = 19.0 Hz), 133.2, 133.0, 132.2 (d, *J* = 9.6 Hz), 132.1 (d, *J* = 2.8 Hz), 131.4 (d, *J* = 102.3 Hz), 130.7 (d, *J* = 96.8 Hz), 129.2, 128.8 (d, *J* = 11.9 Hz), 128.4, 128.1, 127.8, 127.0, 126.8, 126.6, 15.4 (d, *J* = 10.9 Hz); <sup>31</sup>P NMR (162 MHz, CDCl<sub>3</sub>) δ 33.50; HRMS (ESI) *m/z* [M+H]<sup>+</sup> calcd for [C<sub>25</sub>H<sub>22</sub>OP]<sup>+</sup> 369.1403, found 369.1408.

(*E*)-diphenyl(1-(thiophen-2-yl)prop-1-en-2-yl)phosphine oxide (**3l**)

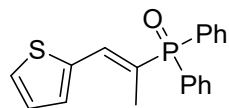

Prepared following the general procedure, purified by column chromatography (2/1 petroleum ether/ ethyl acetate), and isolated as a colorless oil (41 mg, 63%).  $^1\text{H}$  NMR (400 MHz,  $\text{CDCl}_3$ )  $\delta$  7.77-7.68 (m, 4H), 7.58-7.52 (m, 2H), 7.51-7.40 (m, 6H), 7.20 (d,  $J$  = 3.6 Hz, 1H), 7.09 (dd,  $J$  = 5.1, 3.7 Hz, 1H), 2.15 (d,  $J$  = 13.8 Hz, 3H);  $^{13}\text{C}$  NMR (100 MHz,  $\text{CDCl}_3$ )  $\delta$  139.3 (d,  $J$  = 21.8 Hz), 135.2 (d,  $J$  = 12.4 Hz), 132.2 (d,  $J$  = 9.7 Hz), 132.1 (d,  $J$  = 3.0 Hz), 131.5 (d,  $J$  = 104.6 Hz), 131.4, 128.8, 128.7 (d,  $J$  = 12.2 Hz), 127.3, 126.1 (d,  $J$  = 100.2 Hz), 15.9 (d,  $J$  = 10.7 Hz);  $^{31}\text{P}$  NMR (162 MHz,  $\text{CDCl}_3$ )  $\delta$  33.29; HRMS (ESI)  $m/z$   $[\text{M}+\text{H}]^+$  calcd for  $[\text{C}_{19}\text{H}_{18}\text{OPS}]^+$  325.0810, found 325.0812.

(1,1-di-p-tolylprop-1-en-2-yl)diphenylphosphine oxide (**3m**)

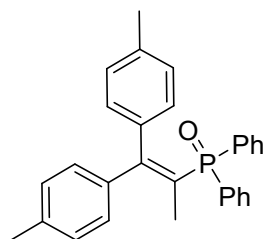

Prepared following the general procedure, purified by column chromatography (2/1 petroleum ether/ ethyl acetate), and isolated as a colorless oil (52 mg, 62%).  $^1\text{H}$  NMR (400 MHz,  $\text{CDCl}_3$ )  $\delta$  7.75-7.65 (m, 4H), 7.39-7.25 (m, 6H), 7.16 (d,  $J$  = 7.8 Hz, 2H), 7.08 (d,  $J$  = 7.9 Hz, 2H), 7.00 (d,  $J$  = 8.0 Hz, 2H), 6.71 (d,  $J$  = 7.7 Hz, 2H), 2.37 (s, 3H), 2.13 (s, 3H), 1.93 (d,  $J$  = 13.3 Hz, 3H);  $^{13}\text{C}$  NMR (100 MHz,  $\text{CDCl}_3$ )  $\delta$  157.9 (d,  $J$  = 9.2 Hz), 139.7 (d,  $J$  = 15.4 Hz), 138.5 (d,  $J$  = 8.0 Hz), 137.7 (d,  $J$  = 15.1 Hz), 134.4 (d,  $J$  = 102.2 Hz), 131.3 (d,  $J$  = 9.4 Hz), 130.6 (d,  $J$  = 2.8 Hz), 130.4, 129.3, 129.0, 128.2, 128.1, 128.1, 126.3 (d,  $J$  = 97.0 Hz), 21.6 (d,  $J$  = 12.7 Hz), 21.4, 21.2;  $^{31}\text{P}$  NMR (162 MHz,  $\text{CDCl}_3$ )  $\delta$  27.39; HRMS (ESI)  $m/z$   $[\text{M}+\text{H}]^+$  calcd for  $[\text{C}_{29}\text{H}_{28}\text{OP}]^+$  423.1872, found 423.1876.

(*E*)-(1-phenylprop-1-en-2-yl)di-p-tolylphosphine oxide (**3n**)

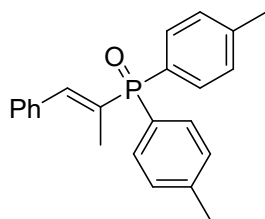

Prepared following the general procedure, purified by column chromatography (2/1 petroleum ether/ ethyl acetate), and isolated as a colorless oil (41 mg, 60%).  $^1\text{H}$  NMR (500 MHz,  $\text{CDCl}_3$ )  $\delta$  7.66-7.59 (m, 4H), 7.38-7.33 (m, 4H), 7.30-7.27 (m, 5H), 7.19 (d,  $J$  = 21.8 Hz, 1H), 2.41 (s, 6H), 2.09 (d,  $J$  = 13.7 Hz, 3H);  $^{13}\text{C}$  NMR (125 MHz,  $\text{CDCl}_3$ )  $\delta$  142.5 (d,  $J$  = 3.4 Hz), 142.4 (d,  $J$  = 12.0 Hz), 136.1 (d,  $J$  = 19.0 Hz), 132.2 (d,  $J$  = 10.0 Hz), 130.9 (d,  $J$  = 97.1 Hz), 129.5, 129.4 (d,  $J$  = 12.4 Hz), 128.5, 128.4, 128.2 (d,  $J$  = 104.4 Hz), 21.7, 15.2 (d,  $J$  = 10.8 Hz);  $^{31}\text{P}$  NMR (202 MHz,  $\text{CDCl}_3$ )  $\delta$  33.61; HRMS (ESI)  $m/z$   $[\text{M}+\text{H}]^+$  calcd for  $[\text{C}_{23}\text{H}_{24}\text{OP}]^+$  347.1559, found 347.1562.

(*E*)-bis(4-chlorophenyl)(1-phenylprop-1-en-2-yl)phosphine oxide (**3o**)

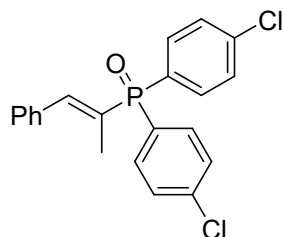

Prepared following the general procedure, purified by column chromatography (2/1 petroleum ether/ ethyl acetate), and isolated as a colorless oil (42 mg, 54%).  $^1\text{H}$  NMR (400 MHz,  $\text{CDCl}_3$ )  $\delta$  7.71-7.63 (m, 4H), 7.51-7.46 (m, 4H), 7.42-7.31 (m, 5H), 7.20 (d,  $J = 22.4$  Hz, 1H), 2.10 (d,  $J = 14.1$  Hz, 3H);  $^{13}\text{C}$  NMR (100 MHz,  $\text{CDCl}_3$ )  $\delta$  143.5 (d,  $J = 11.1$  Hz), 138.9 (d,  $J = 3.2$  Hz), 135.5 (d,  $J = 19.4$  Hz), 133.5 (d,  $J = 10.4$  Hz), 129.6, 129.5 (d,  $J = 103.6$  Hz), 129.4 (d,  $J = 98.6$  Hz), 129.2 (d,  $J = 12.6$  Hz), 128.8, 128.6, 15.1 (d,  $J = 10.9$  Hz);  $^{31}\text{P}$  NMR (162 MHz,  $\text{CDCl}_3$ )  $\delta$  32.04; HRMS (ESI)  $m/z$   $[\text{M}+\text{H}]^+$  calcd for  $[\text{C}_{21}\text{H}_{18}\text{Cl}_2\text{OP}]^+$  387.0467, found 387.0462.

(*E*)-bis(4-bromophenyl)(1-phenylprop-1-en-2-yl)phosphine oxide (**3p**)

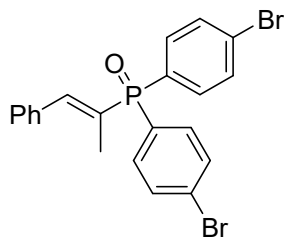

Prepared following the general procedure, purified by column chromatography (2/1 petroleum ether/ ethyl acetate), and isolated as a colorless oil (48 mg, 51%).  $^1\text{H}$  NMR (400 MHz,  $\text{CDCl}_3$ )  $\delta$  7.68-7.56 (m, 8H), 7.43-7.31 (m, 5H), 7.20 (d,  $J = 22.4$  Hz, 1H), 2.09 (d,  $J = 14.1$  Hz, 3H);  $^{13}\text{C}$  NMR (100 MHz,  $\text{CDCl}_3$ )  $\delta$  143.5 (d,  $J = 10.9$  Hz), 135.4 (d,  $J = 19.4$  Hz), 133.6 (d,  $J = 10.3$  Hz), 132.2 (d,  $J = 12.3$  Hz), 130.0 (d,  $J = 102.9$  Hz), 129.6, 129.3 (d,  $J = 98.5$  Hz), 128.8, 128.6, 127.6 (d,  $J = 3.4$  Hz), 15.1 (d,  $J = 11.0$  Hz);  $^{31}\text{P}$  NMR (162 MHz,  $\text{CDCl}_3$ )  $\delta$  32.29; HRMS (ESI)  $m/z$   $[\text{M}+\text{H}]^+$  calcd for  $[\text{C}_{21}\text{H}_{18}\text{Br}_2\text{OP}]^+$  474.9457, found 474.9461.

(*E*)-di(naphthalen-1-yl)(1-phenylprop-1-en-2-yl)phosphine oxide (**3q**)

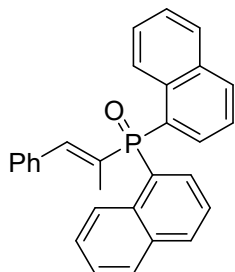

Prepared following the general procedure, purified by column chromatography (2/1 petroleum ether/ ethyl acetate), and isolated as a colorless oil (54 mg, 64%).  $^1\text{H}$  NMR (400 MHz,  $\text{CDCl}_3$ )  $\delta$  8.92-8.87 (m, 2H), 8.03 (d,  $J = 8.2$  Hz, 2H), 7.95-7.90 (m, 2H), 7.60-7.49 (m, 6H), 7.45-7.35 (m, 7H), 7.34-7.29 (m, 1H), 2.15 (d,  $J = 13.9$  Hz, 3H);  $^{13}\text{C}$  NMR (100 MHz,  $\text{CDCl}_3$ ):  $\delta$  143.2 (d,  $J = 10.8$  Hz), 136.2 (d,  $J = 19.2$  Hz), 134.3 (d,  $J = 20.8$  Hz), 134.2 (d,  $J = 4.0$  Hz), 133.3 (d,

$J = 9.8$  Hz), 133.2, 131.1 (d,  $J = 96.6$  Hz), 129.6, 128.9, 128.6, 128.5, 128.2 (d,  $J = 100.5$  Hz), 127.9 (d,  $J = 5.2$  Hz), 127.5, 126.7, 124.5 (d,  $J = 14.0$  Hz), 16.0 (d,  $J = 10.4$  Hz);  $^{31}\text{P}$  NMR (162 MHz,  $\text{CDCl}_3$ )  $\delta$  40.03; HRMS (ESI)  $m/z$   $[\text{M}+\text{H}]^+$  calcd for  $[\text{C}_{29}\text{H}_{24}\text{OP}]^+$  419.1559, found 419.1556.

(*E*)-di([1,1'-biphenyl]-4-yl)(1-phenylprop-1-en-2-yl)phosphine oxide (**3r**)

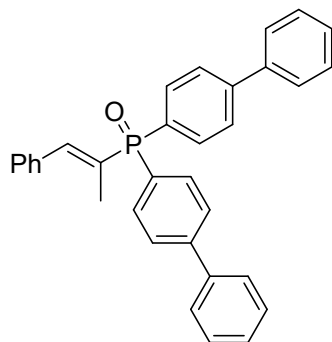

Prepared following the general procedure, purified by column chromatography (2/1 petroleum ether/ ethyl acetate), and isolated as a colorless oil (68 mg, 72%).  $^1\text{H}$  NMR (400 MHz,  $\text{CDCl}_3$ )  $\delta$  7.91-7.84 (m, 4H), 7.76-7.72 (m, 4H), 7.66-7.61 (m, 4H), 7.50-7.45 (m, 4H), 7.44-7.37 (m, 6H), 7.36-7.29 (m, 2H), 2.19 (d,  $J = 13.8$  Hz, 3H);  $^{13}\text{C}$  NMR (100 MHz,  $\text{CDCl}_3$ )  $\delta$  144.9 (d,  $J = 2.6$  Hz), 142.9 (d,  $J = 10.7$  Hz), 140.1, 136.0 (d,  $J = 19.0$  Hz), 132.8 (d,  $J = 9.9$  Hz), 130.4 (d,  $J = 97.5$  Hz), 130.0 (d,  $J = 102.7$  Hz), 129.6, 129.1, 128.6, 128.5 (d,  $J = 3.5$  Hz), 128.3, 127.5, 127.4, 15.3 (d,  $J = 10.8$  Hz);  $^{31}\text{P}$  NMR (162 MHz,  $\text{CDCl}_3$ )  $\delta$  33.24; HRMS (ESI)  $m/z$   $[\text{M}+\text{H}]^+$  calcd for  $[\text{C}_{33}\text{H}_{28}\text{OP}]^+$  471.1872, found 471.1876.

(*E*)-bis(2-methoxyphenyl)(1-phenylprop-1-en-2-yl)phosphine oxide (**3s**)

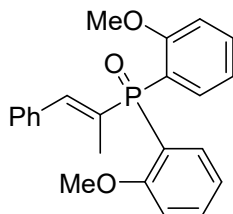

Prepared following the general procedure, purified by column chromatography (2/1 petroleum ether/ ethyl acetate), and isolated as a colorless oil (61 mg, 80%).  $^1\text{H}$  NMR (500 MHz,  $\text{CDCl}_3$ )  $\delta$  7.59-7.55 (m, 2H), 7.41-7.38 (m, 2H), 7.32-7.25 (m, 5H), 7.18 (d,  $J = 7.6$  Hz, 1H), 6.96-6.93 (m, 2H), 6.85-6.82 (m, 2H), 3.59 (s, 6H), 2.00 (d,  $J = 14.8$  Hz, 3H);  $^{13}\text{C}$  NMR (125 MHz,  $\text{CDCl}_3$ )  $\delta$  161.2 (d,  $J = 2.7$  Hz), 140.2 (d,  $J = 10.7$  Hz), 136.8 (d,  $J = 19.4$  Hz), 134.3 (d,  $J = 7.7$  Hz), 133.4, 131.9 (d,  $J = 101.9$  Hz), 129.4, 128.3, 127.7, 120.8 (d,  $J = 12.1$  Hz), 120.6 (d,  $J = 104.7$  Hz), 111.0 (d,  $J = 6.4$  Hz), 55.4, 15.1 (d,  $J = 12.0$  Hz);  $^{31}\text{P}$  NMR (202 MHz,  $\text{CDCl}_3$ )  $\delta$  29.89; HRMS (ESI)  $m/z$   $[\text{M}+\text{H}]^+$  calcd for  $[\text{C}_{23}\text{H}_{24}\text{O}_3\text{P}]^+$  379.1458, found 379.1453.

(*E*)-bis(3,5-di-tert-butylphenyl)(1-phenylprop-1-en-2-yl)phosphine oxide (**3t**)

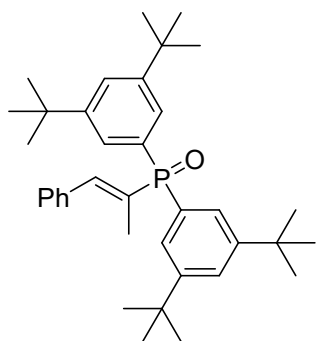

Prepared following the general procedure, purified by column chromatography (2/1 petroleum ether/ ethyl acetate), and isolated as a colorless oil (67 mg, 62%).  $^1\text{H}$  NMR (400 MHz,  $\text{CDCl}_3$ )  $\delta$  7.61-7.55 (m, 6H), 7.41-7.34 (m, 4H), 7.32-7.25 (m, 2H), 2.07 (d,  $J = 13.6$  Hz, 3H), 1.31 (s, 36H);  $^{13}\text{C}$  NMR (100 MHz,  $\text{CDCl}_3$ )  $\delta$  150.9 (d,  $J = 11.5$  Hz), 142.0 (d,  $J = 10.3$  Hz), 136.4 (d,  $J = 18.2$  Hz), 131.3 (d,  $J = 95.4$  Hz), 130.4 (d,  $J = 102.3$  Hz), 129.3, 128.4, 128.1, 126.3 (d,  $J = 10.3$  Hz), 125.9 (d,  $J = 2.7$  Hz), 35.1, 31.4, 15.1 (d,  $J = 11.0$  Hz);  $^{31}\text{P}$  NMR (162 MHz,  $\text{CDCl}_3$ )  $\delta$  35.37; HRMS (ESI)  $m/z$   $[\text{M}+\text{H}]^+$  calcd for  $[\text{C}_{37}\text{H}_{52}\text{OP}]^+$  543.3750, found 543.3754.

(*E*)-bis(3,5-dimethylphenyl)(1-phenylprop-1-en-2-yl)phosphine oxide (**3u**)

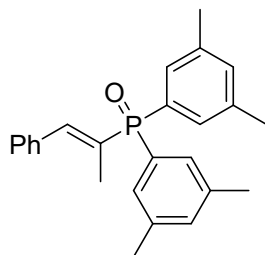

Prepared following the general procedure, purified by column chromatography (2/1 petroleum ether/ ethyl acetate), and isolated as a colorless oil (49 mg, 65%).  $^1\text{H}$  NMR (400 MHz,  $\text{CDCl}_3$ )  $\delta$  7.40-7.29 (m, 9H), 7.23-7.15 (m, 3H), 2.34 (s, 12H), 2.11 (d,  $J = 13.6$  Hz, 3H);  $^{13}\text{C}$  NMR (100 MHz,  $\text{CDCl}_3$ )  $\delta$  142.3 (d,  $J = 11.0$  Hz), 138.3 (d,  $J = 12.3$  Hz), 136.2 (d,  $J = 18.8$  Hz), 133.7 (d,  $J = 2.9$  Hz), 131.2 (d,  $J = 101.4$  Hz), 130.9 (d,  $J = 96.0$  Hz), 129.7 (d,  $J = 9.5$  Hz), 129.6, 128.5, 128.3, 21.5, 15.3 (d,  $J = 10.7$  Hz);  $^{31}\text{P}$  NMR (162 MHz,  $\text{CDCl}_3$ )  $\delta$  33.96; HRMS (ESI)  $m/z$   $[\text{M}+\text{H}]^+$  calcd for  $[\text{C}_{25}\text{H}_{28}\text{OP}]^+$  375.1872, found 375.1875.

diethyl (*E*)-(1-phenylprop-1-en-2-yl)phosphonate (**3v**)

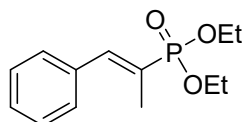

Prepared following the general procedure, purified by column chromatography (2/1 petroleum ether/ ethyl acetate), and isolated as a colorless oil (30 mg, 58%).  $^1\text{H}$  NMR (400 MHz,  $\text{CDCl}_3$ )  $\delta$  7.46 (d,  $J = 24.8$  Hz, 1H), 7.39-7.36 (m, 4H), 7.34-7.28 (m, 1H), 4.21-4.02 (m, 4H), 2.06 (d,  $J = 15.3$  Hz, 3H), 1.35 (t,  $J = 7.1$  Hz, 6H);  $^{13}\text{C}$  NMR (100 MHz,  $\text{CDCl}_3$ )  $\delta$  142.8 (d,  $J = 11.8$  Hz), 135.8 (d,  $J = 23.8$  Hz), 129.6, 128.5, 126.0 (d,  $J = 178.1$  Hz), 61.9 (d,  $J = 5.6$  Hz), 16.5 (d,  $J = 6.2$  Hz), 14.4 (d,  $J = 9.0$  Hz);  $^{31}\text{P}$  NMR (162 MHz,  $\text{CDCl}_3$ )  $\delta$  22.12; HRMS (ESI)  $m/z$

$[M+H]^+$  calcd for  $[C_{13}H_{20}O_3P]^+$  255.1145, found 255.1140.

## 6. Procedure of Gram-Scale Experiment

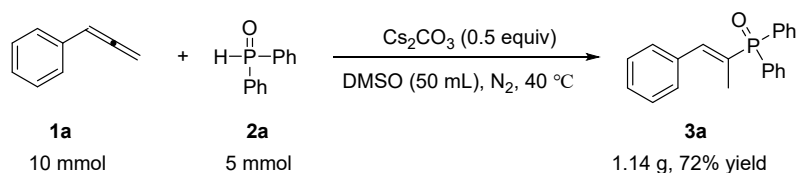

To an oven dried Schlenk tube (100 mL) containing a magnetic stir bar, phosphine oxides (1.01 g, 5 mmol, 1 equiv) and  $\text{Cs}_2\text{CO}_3$  (0.82 g, 2.5 mmol, 0.5 equiv) were added. The Schlenk tube was sealed and degassed via vacuum evacuation and subsequent backfilled with  $\text{N}_2$  for three times. Subsequently, allenes (1.16 g, 10 mmol, 2 equiv) and anhydrous DMSO (50 mL) were added. Then the reaction mixture was placed in an oil bath and heated for 24 hours at  $40\text{ }^\circ\text{C}$ . Upon completion, water and EtOAc were added to the reaction mixture, and the aqueous phase was extracted with EtOAc. The combined organic layers were dried over anhydrous  $\text{MgSO}_4$  and concentrated under reduced pressure. The crude product was purified by column chromatography isolation on silica gel (petroleum ether: ethyl acetate = 2:1 v/v) to afford white solid (*E*)-diphenyl(1-phenylprop-1-en-2-yl)phosphine oxide **3a** in 72% yield (1.14 g).

## 7. Preliminary mechanistic studies

Deuterium labeling experiment

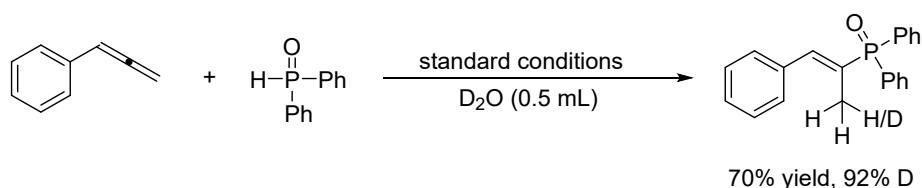

To an oven dried Schlenk tube (10 mL) with a magnetic stir bar, phosphine oxides (0.2 mmol, 1.0 equiv.),  $\text{Cs}_2\text{CO}_3$  (0.1 mmol, 0.5 equiv.) were added. The Schlenk tube was sealed and degassed via vacuum evacuation and subsequent backfilled with  $\text{N}_2$  for three times. Subsequently, allenes (0.4 mmol, 2.0 equiv.),  $\text{D}_2\text{O}$  (0.5 mL) and anhydrous DMSO (2 mL) were added. Then the reaction mixture was placed in an oil bath and heated for 12 hours at  $40\text{ }^\circ\text{C}$ . Upon completion, water and EtOAc were added to the reaction mixture, and the aqueous phase was extracted with EtOAc. The combined organic layers were dried over anhydrous  $\text{MgSO}_4$  and concentrated under reduced pressure. The crude product was purified by column chromatography isolation on silica gel (petroleum ether: ethyl acetate = 2:1 v/v) to give the D-labelled product.

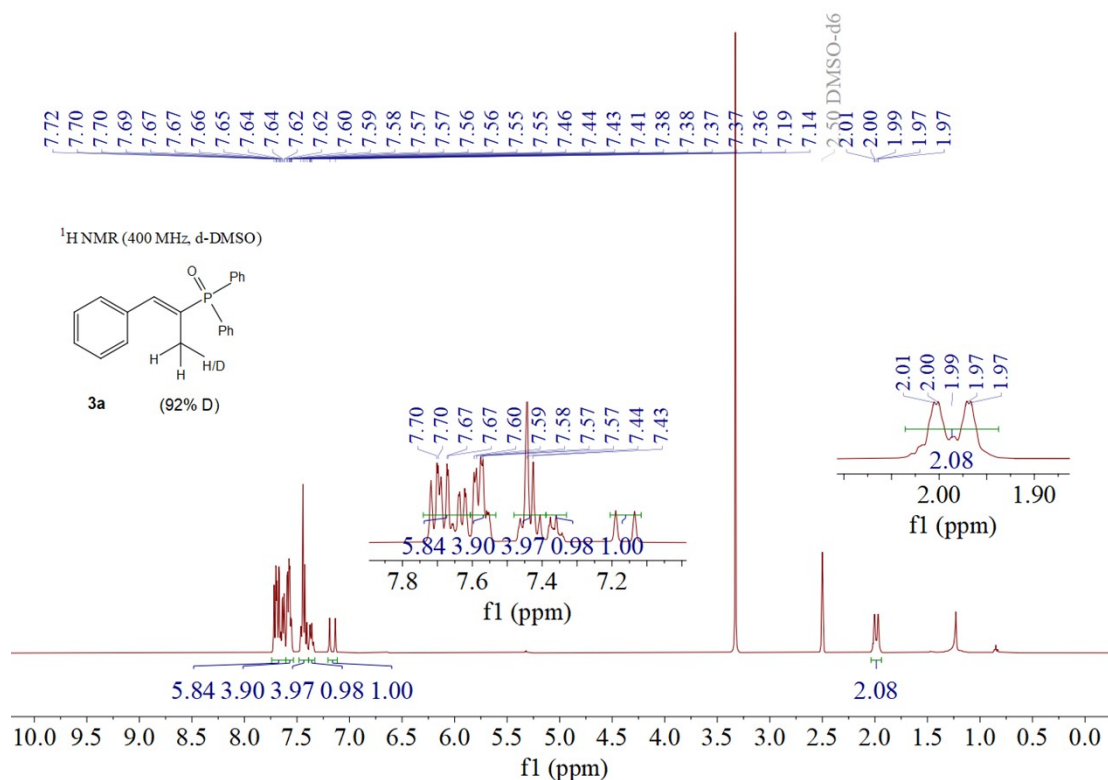

Figure S1. <sup>1</sup>H NMR Spectra of compound **3a** (0.5 mL D<sub>2</sub>O)

## 8. References

- [S1] S. Rej, H. F. T. Klare, M. Oestreich, *Org. Lett.*, 2022, **24**, 1346-1350.
- [S2] M. Brochetta, T. Borsari, A. Gandini, S. Porey, A. Deb, E. Casali, A. Chakraborty, G. Zanoni, D. Maiti, *Chem. Eur. J.*, 2019, **25**, 750-753.
- [S3] J. Jim, J. Choi, H. S. Kim, I. S. Kim, K. C. Nam, J. Kim, S. Lee, *J. Org. Chem.*, 2016, **81**, 303-308.
- [S4] S. Yamazaki, Y. Yamamoto, Y. Fukushima, M. Takebayashi, T. Ukai, Y. Mikata, *J. Org. Chem.*, 2010, **75**, 5216-5222.

## 9. NMR spectra

(*E*)-diphenyl(1-phenylprop-1-en-2-yl)phosphine oxide (**3a**)

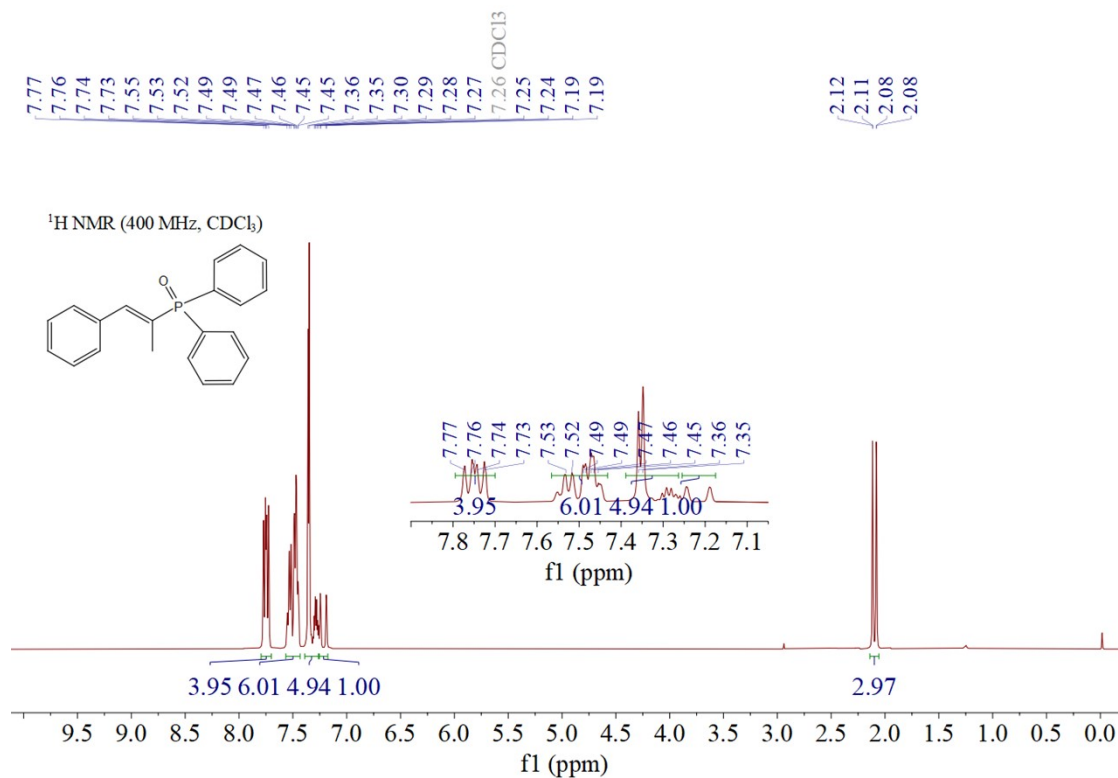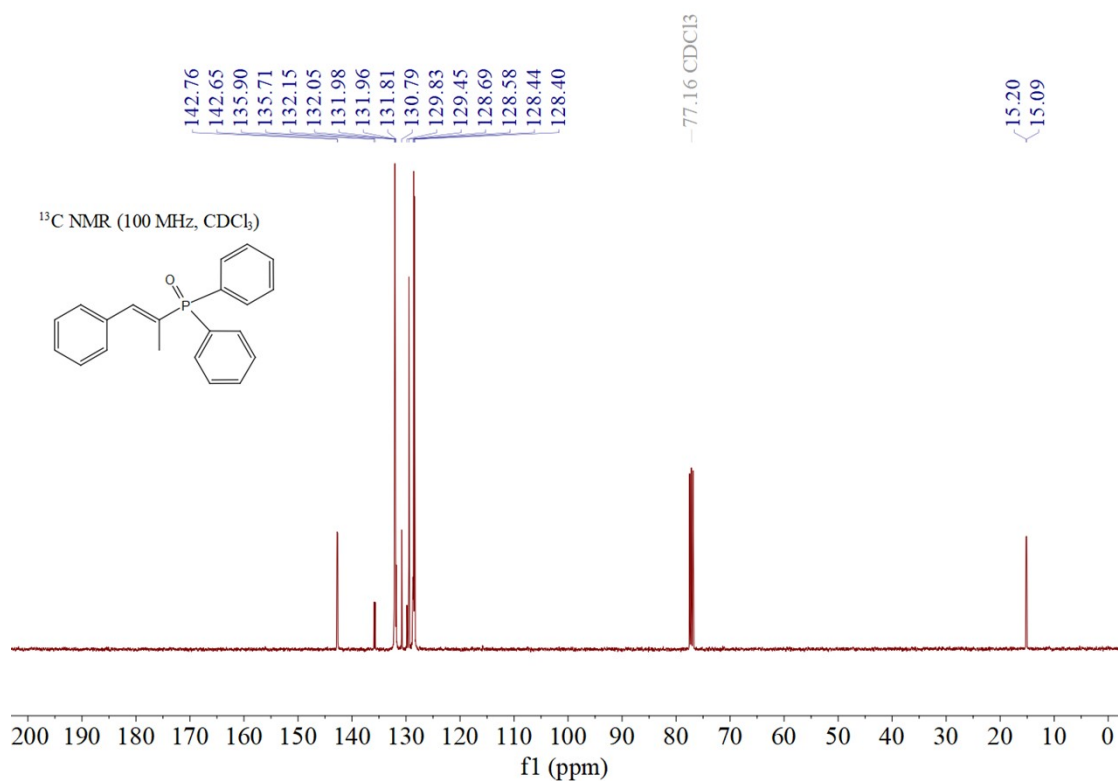



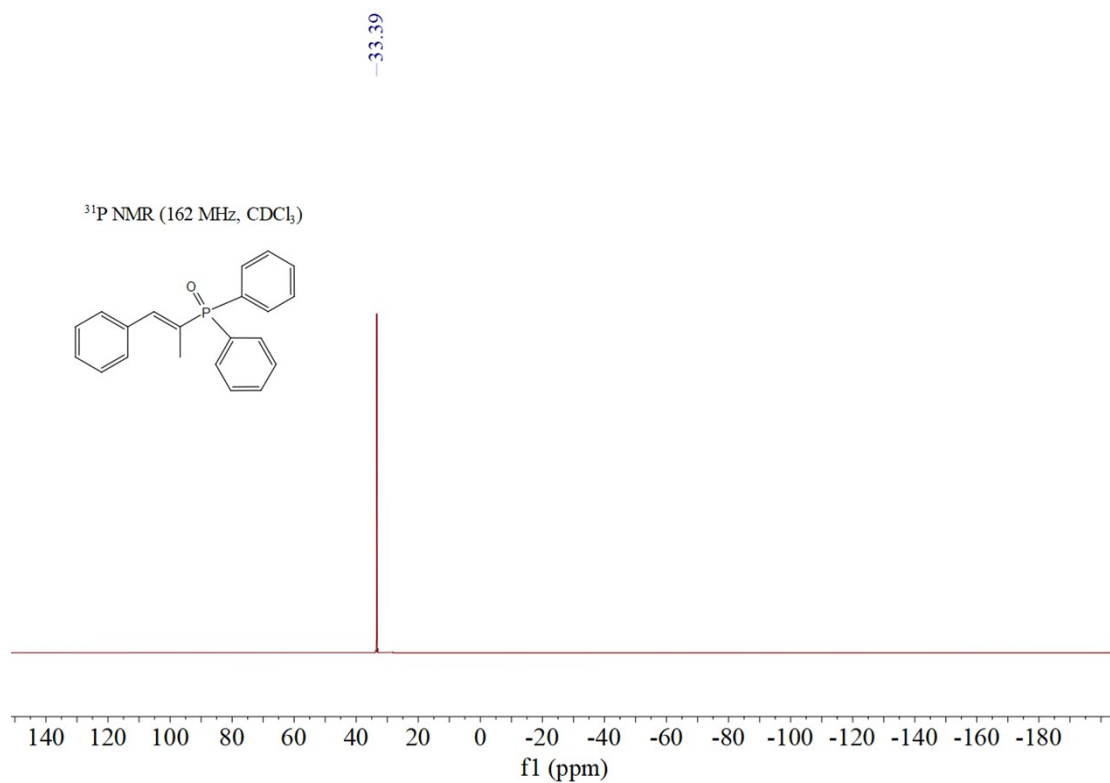

(*E*)-diphenyl(1-(p-tolyl)prop-1-en-2-yl)phosphine oxide (**3b**)

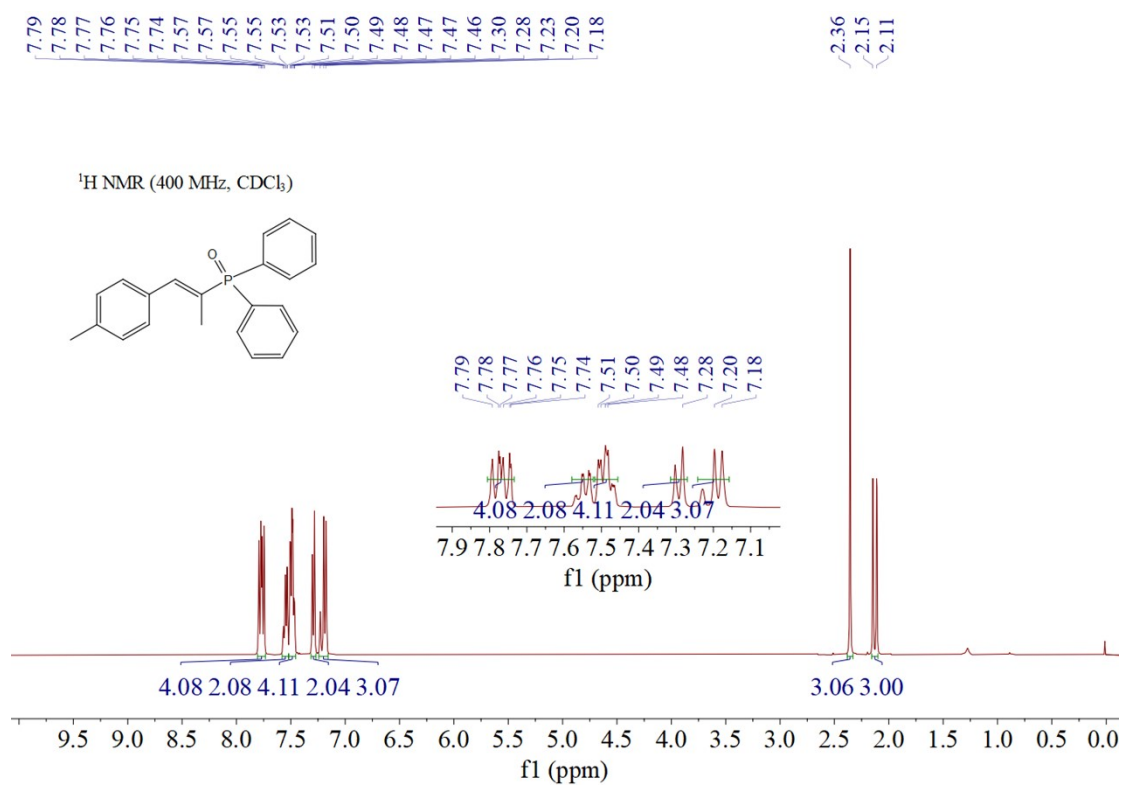

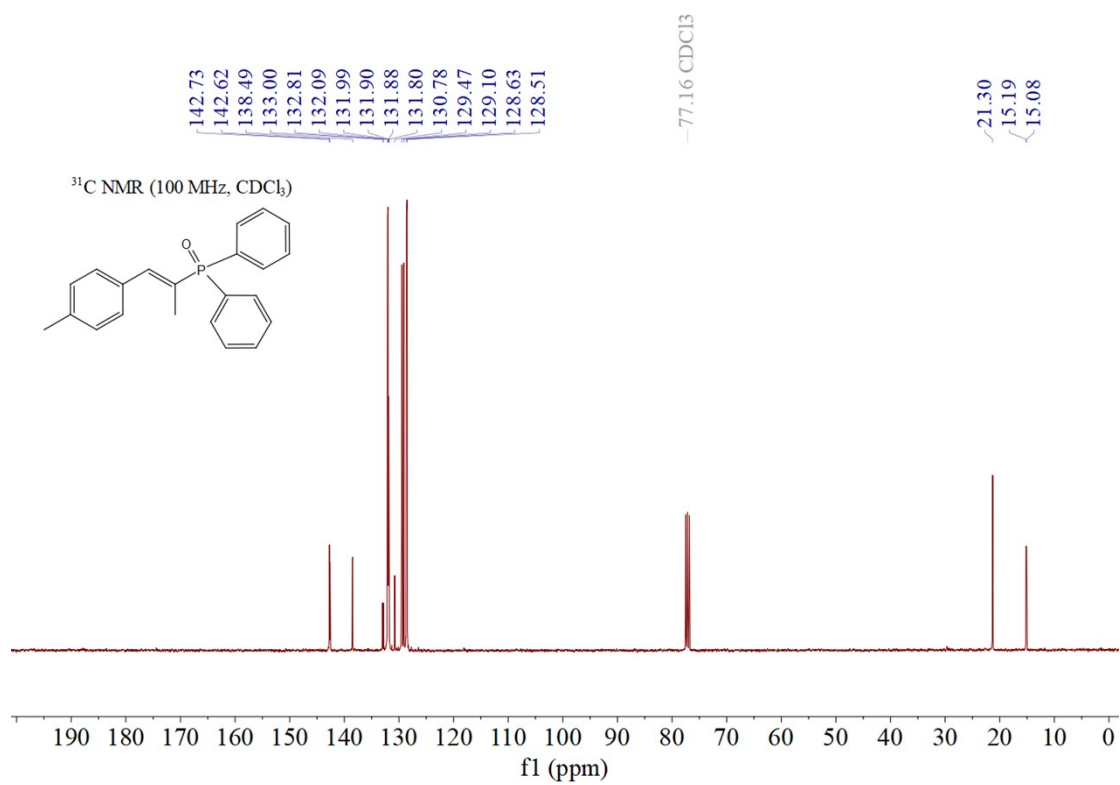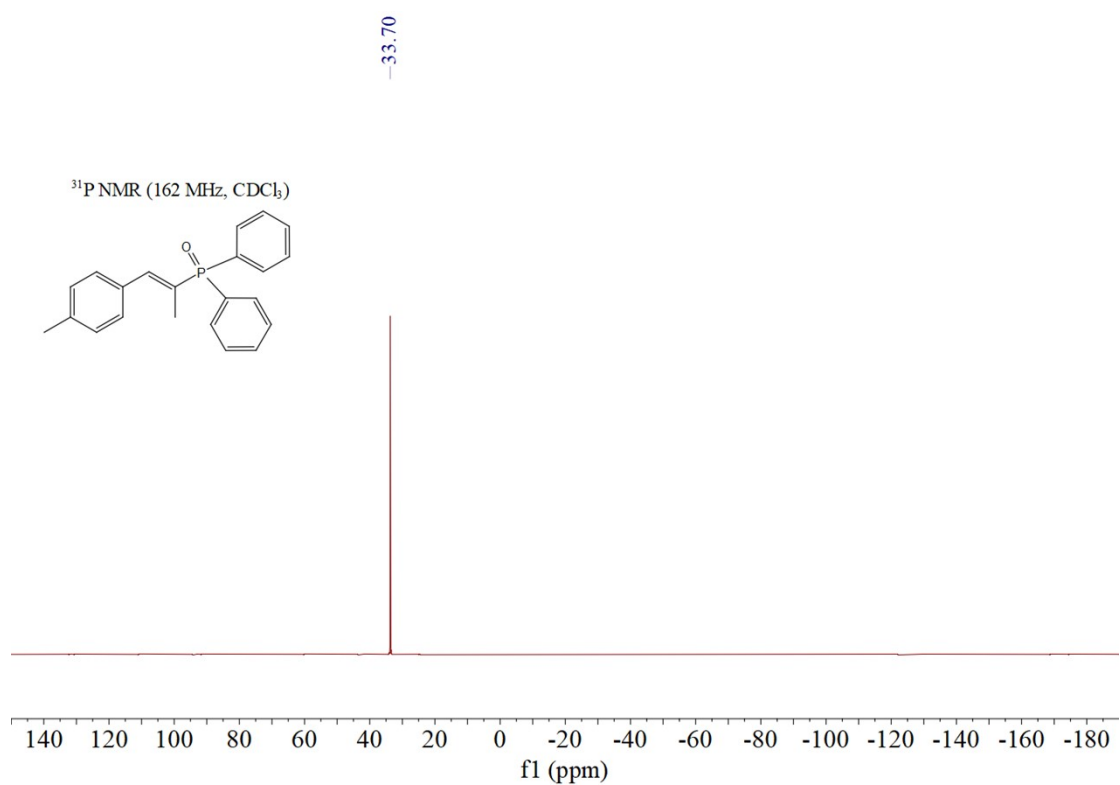

**(E)-diphenyl(1-(m-tolyl)prop-1-en-2-yl)phosphine oxide (3c)**

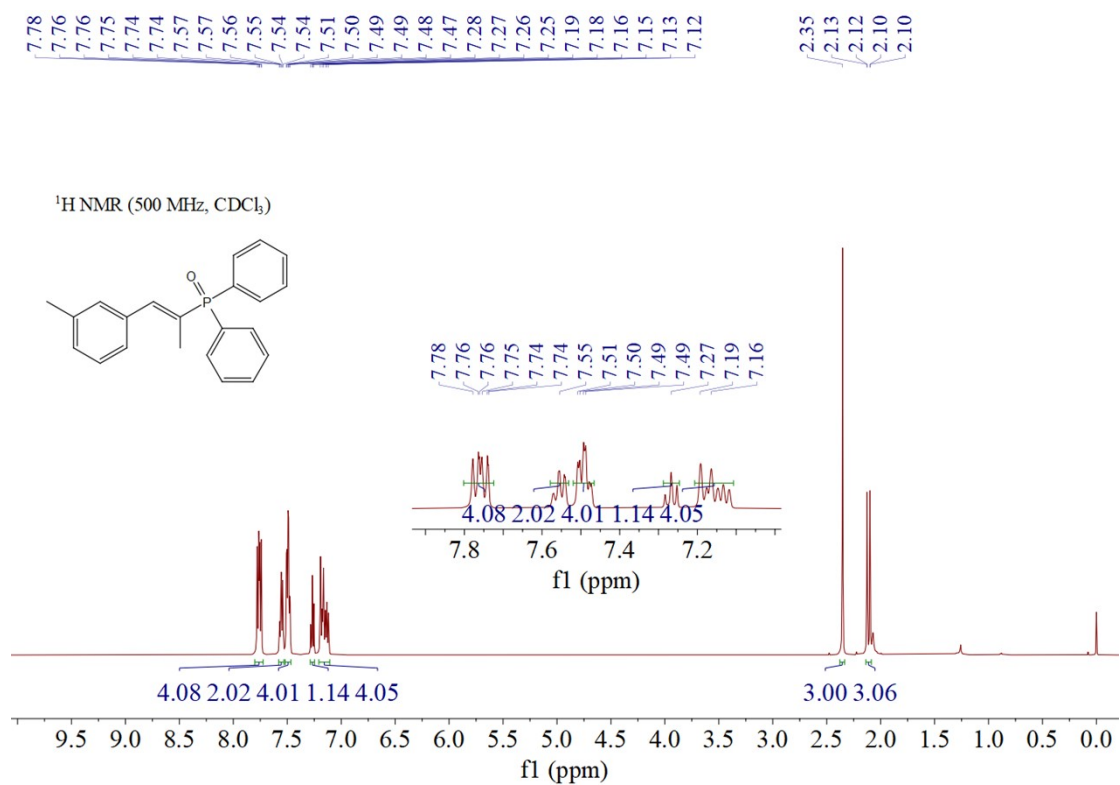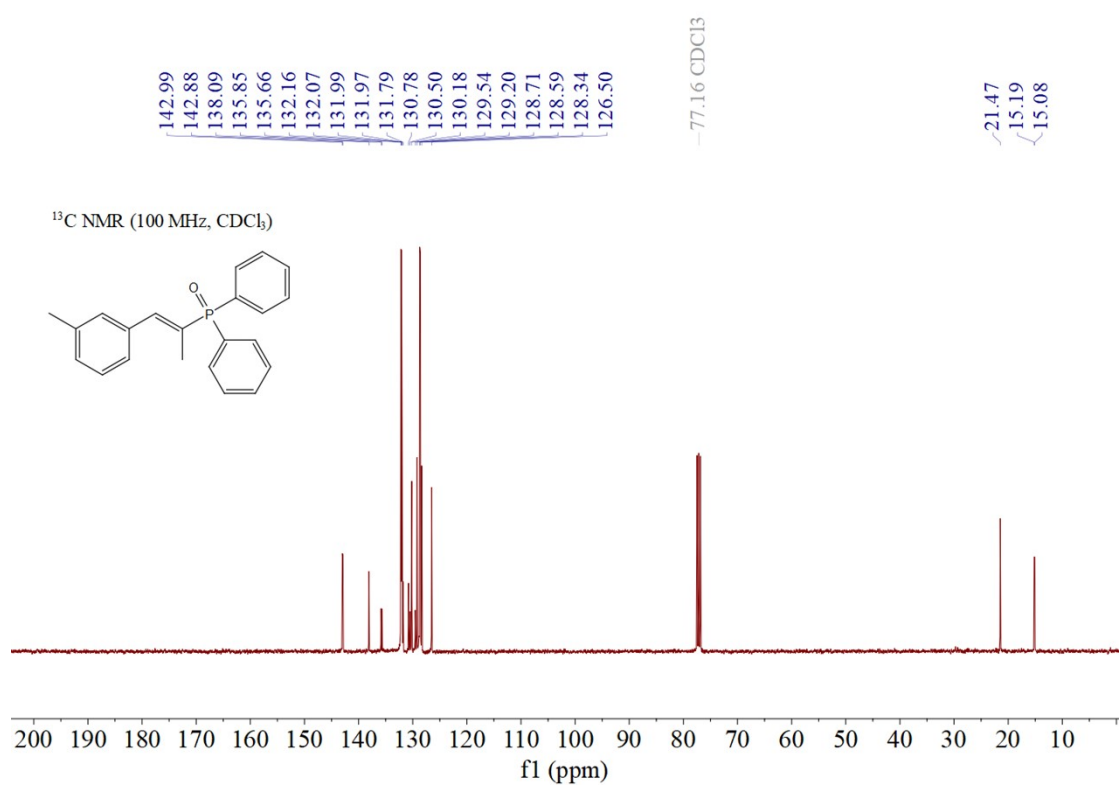

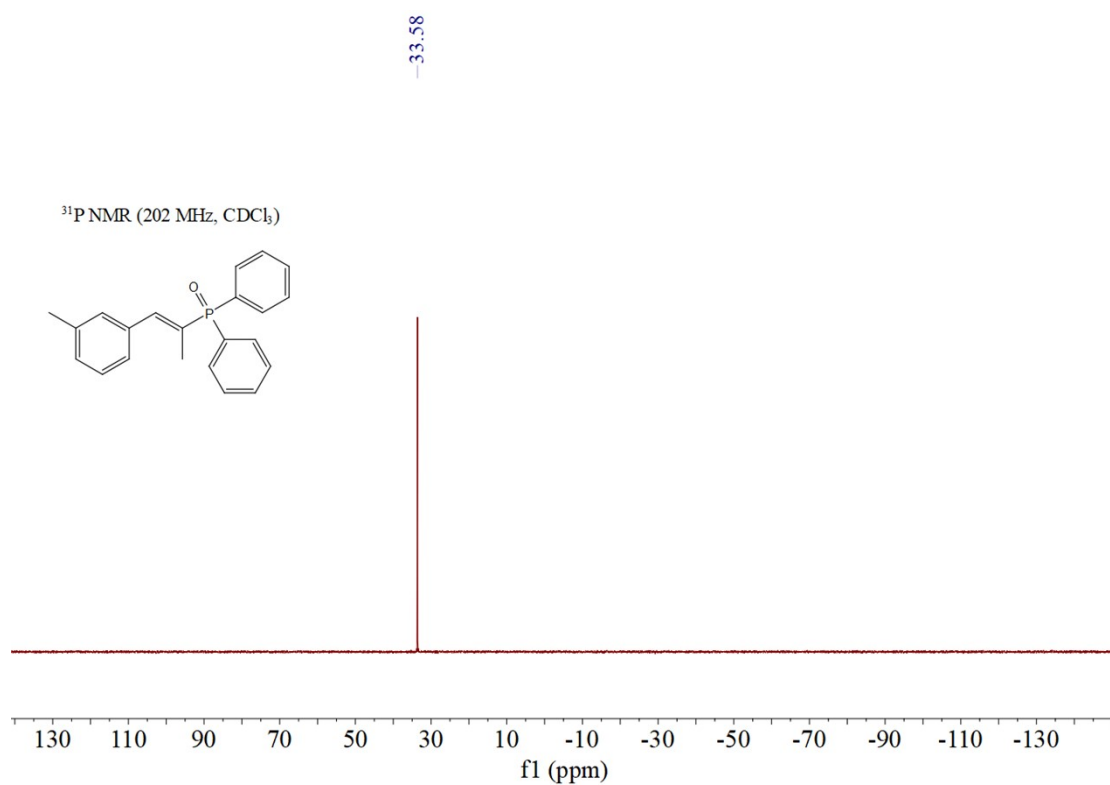

*(E)*-diphenyl(1-(o-tolyl)prop-1-en-2-yl)phosphine oxide (**3d**)

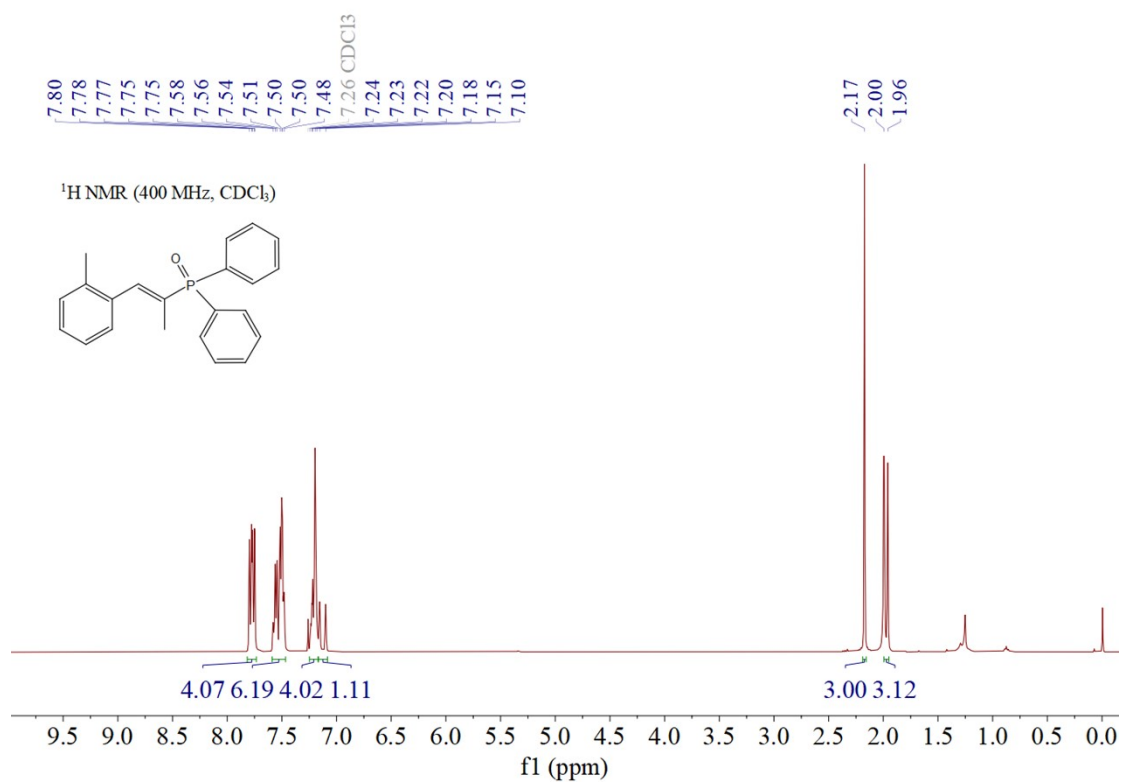

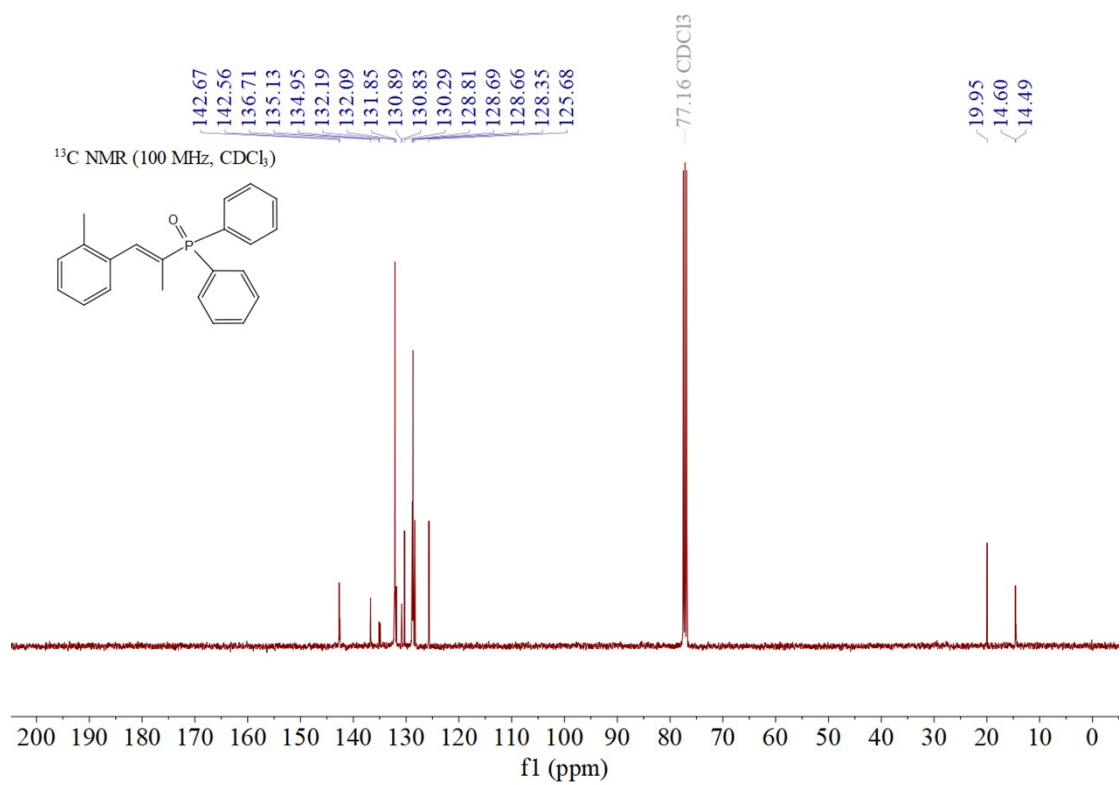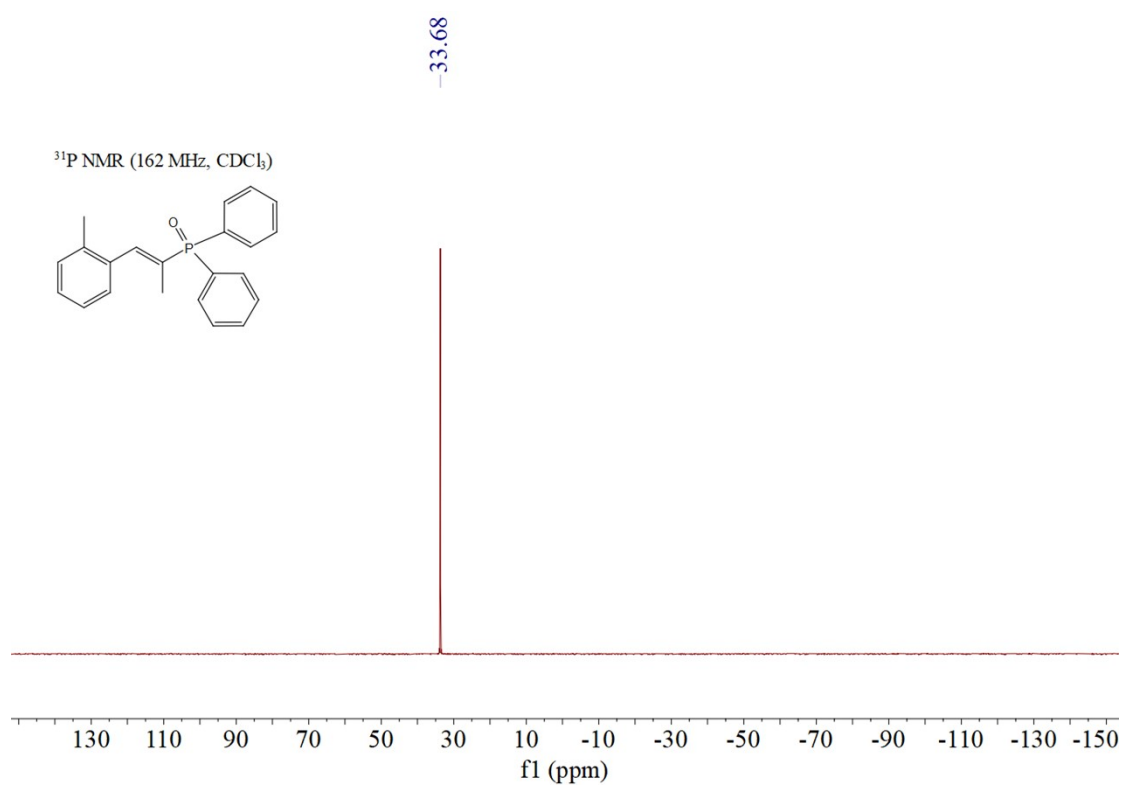

(*E*)-(1-(4-methoxyphenyl)prop-1-en-2-yl)diphenylphosphine oxide (3e)

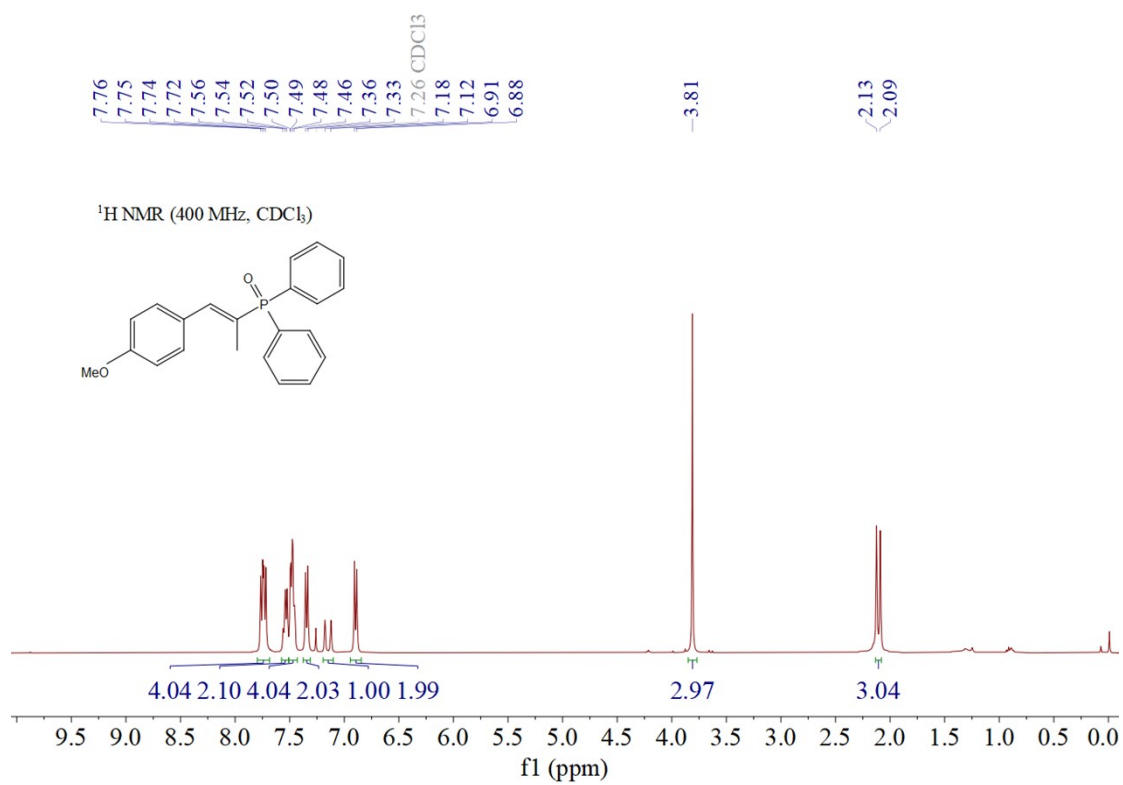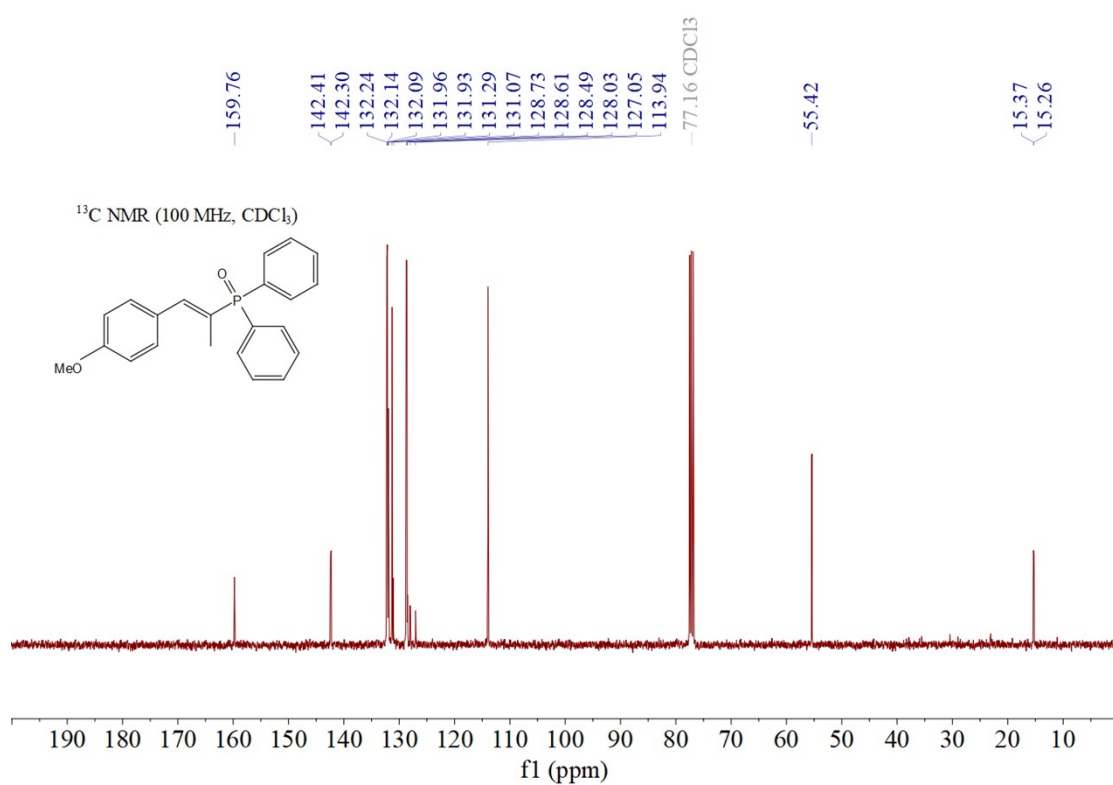

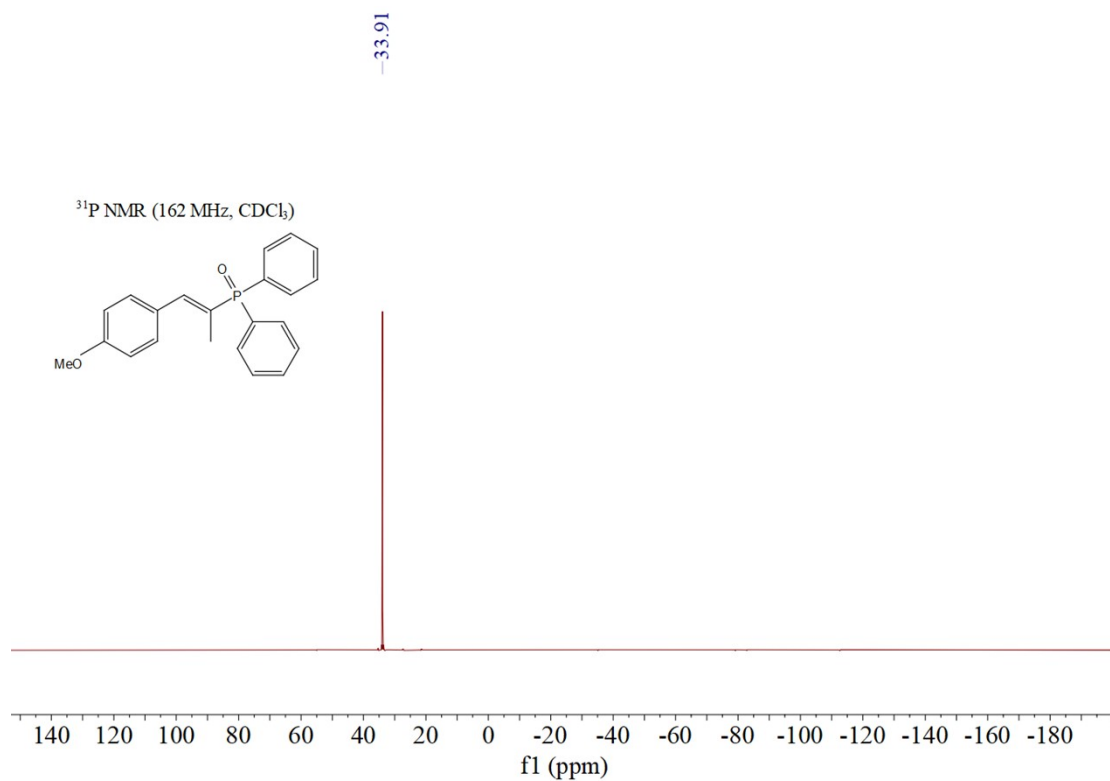

(*E*)-diphenyl(1-(4-(trifluoromethyl)phenyl)prop-1-en-2-yl)phosphine oxide (**3f**)

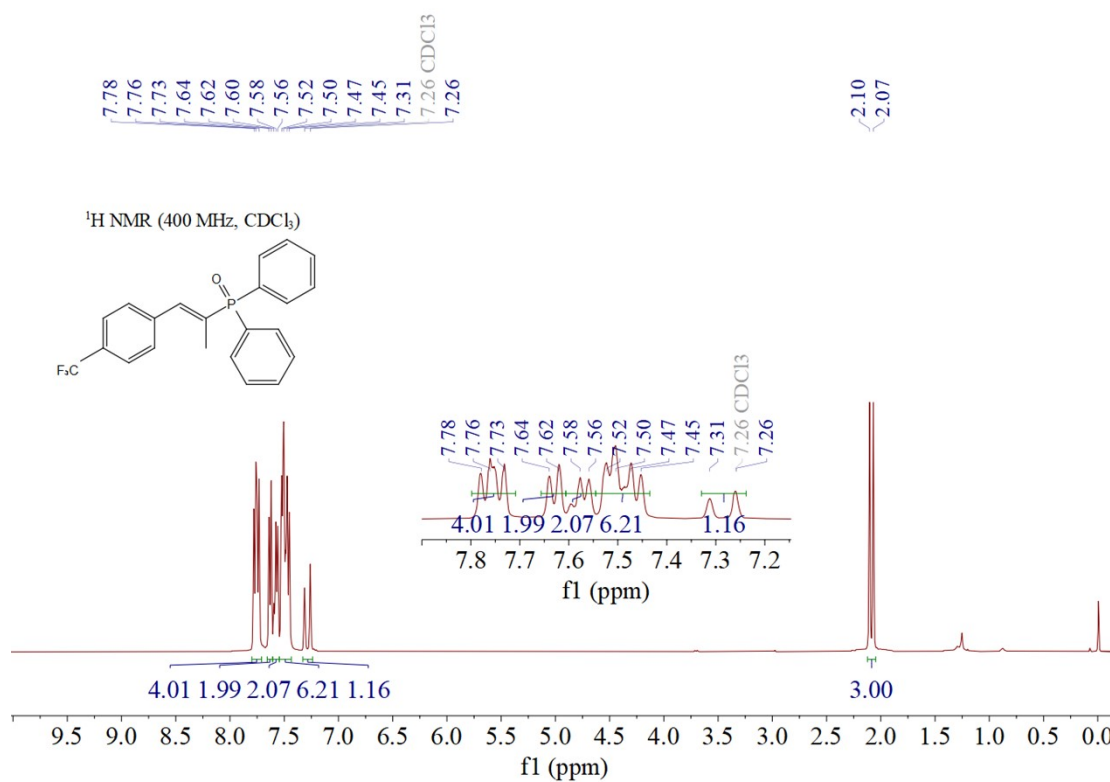

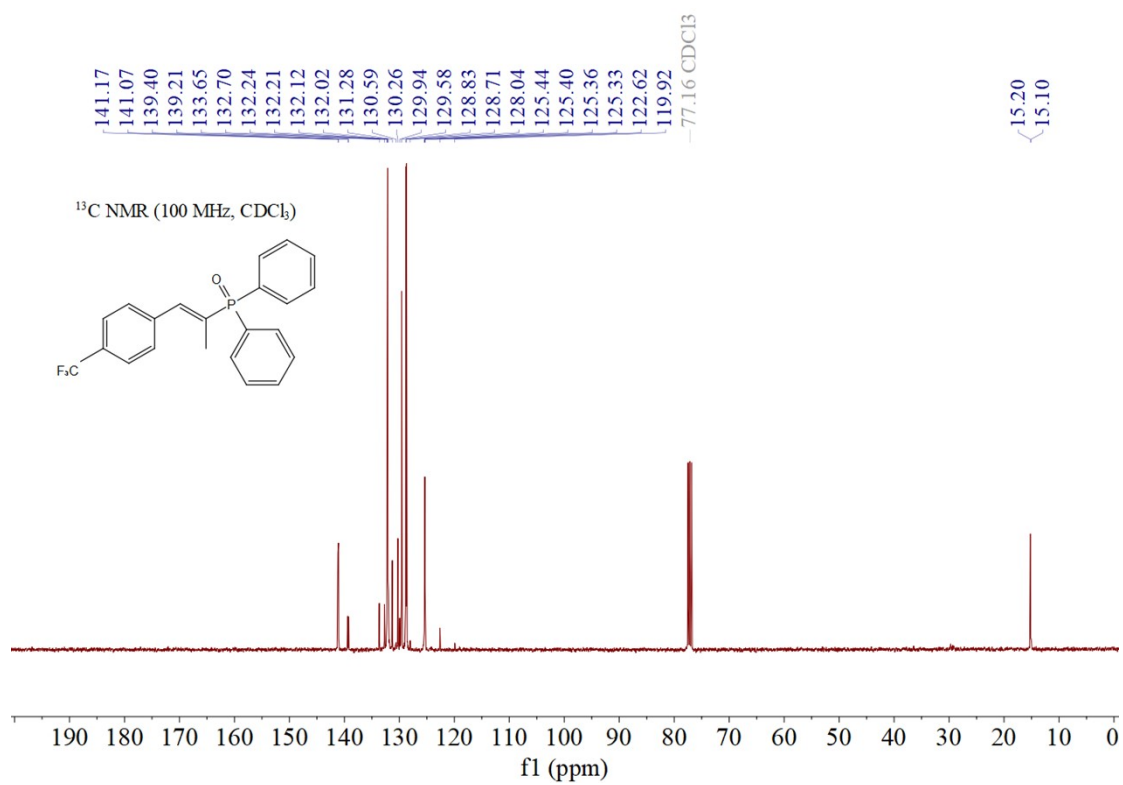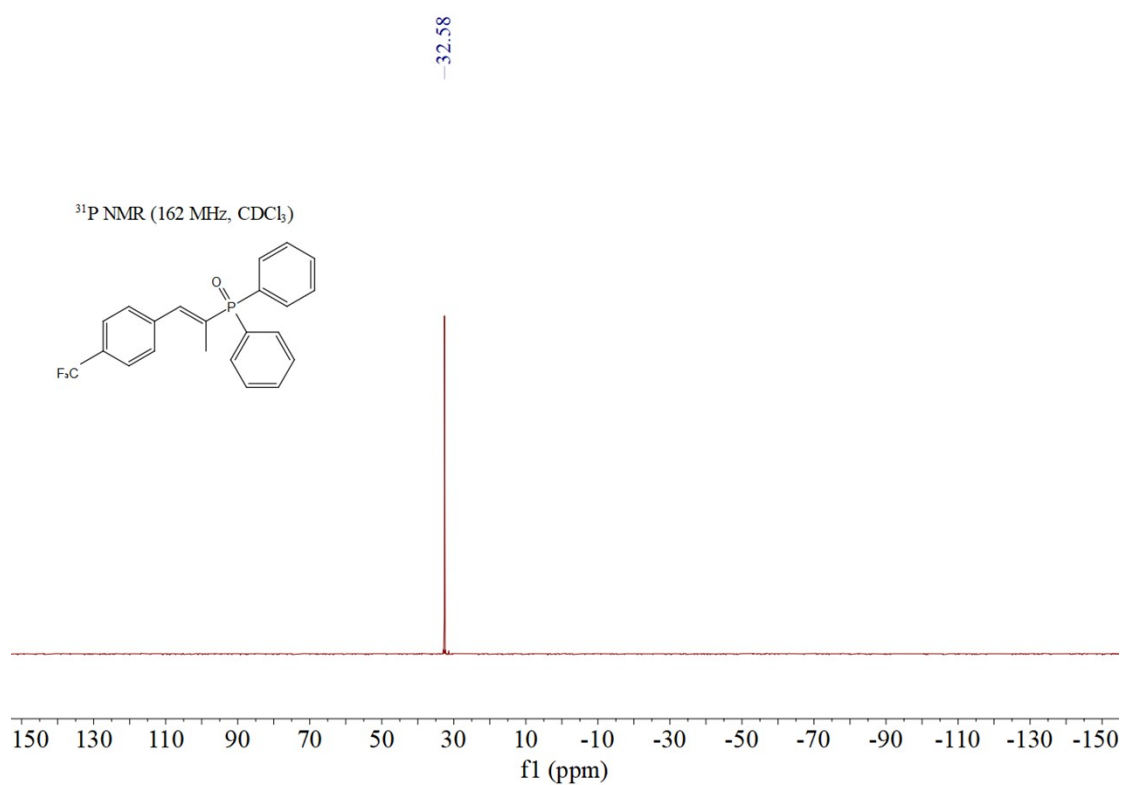



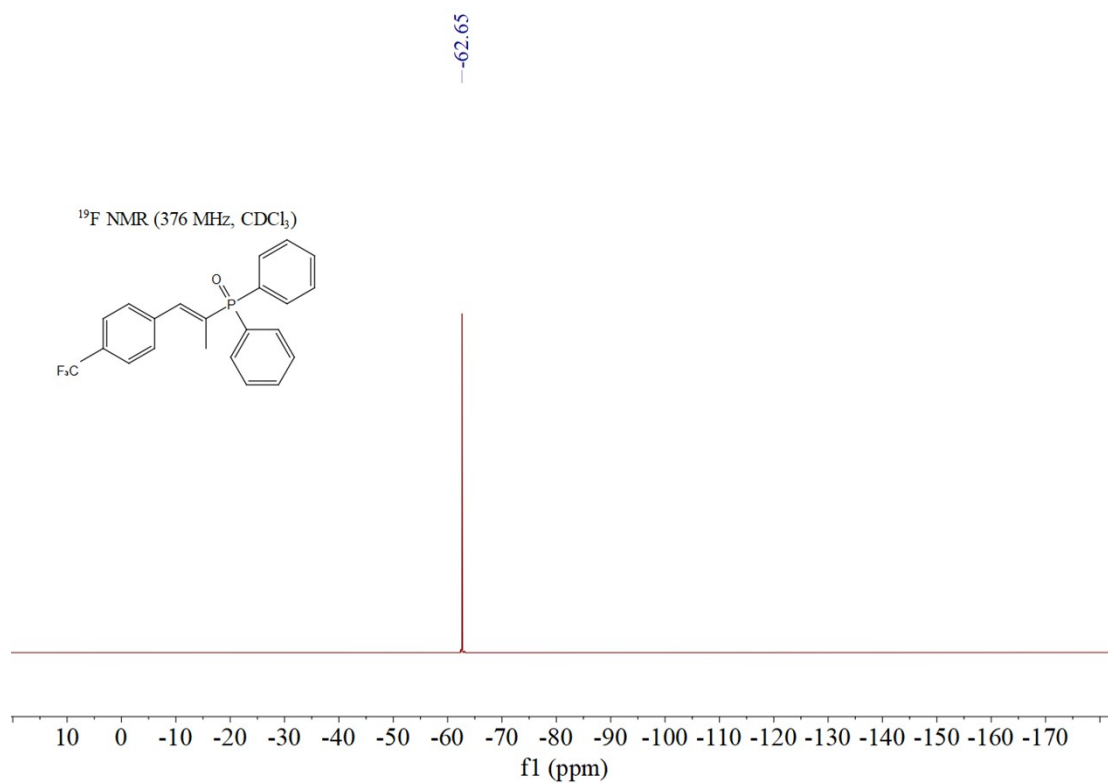

(*E*)-1-(4-fluorophenyl)prop-1-en-2-yl)diphenylphosphine oxide (**3g**)

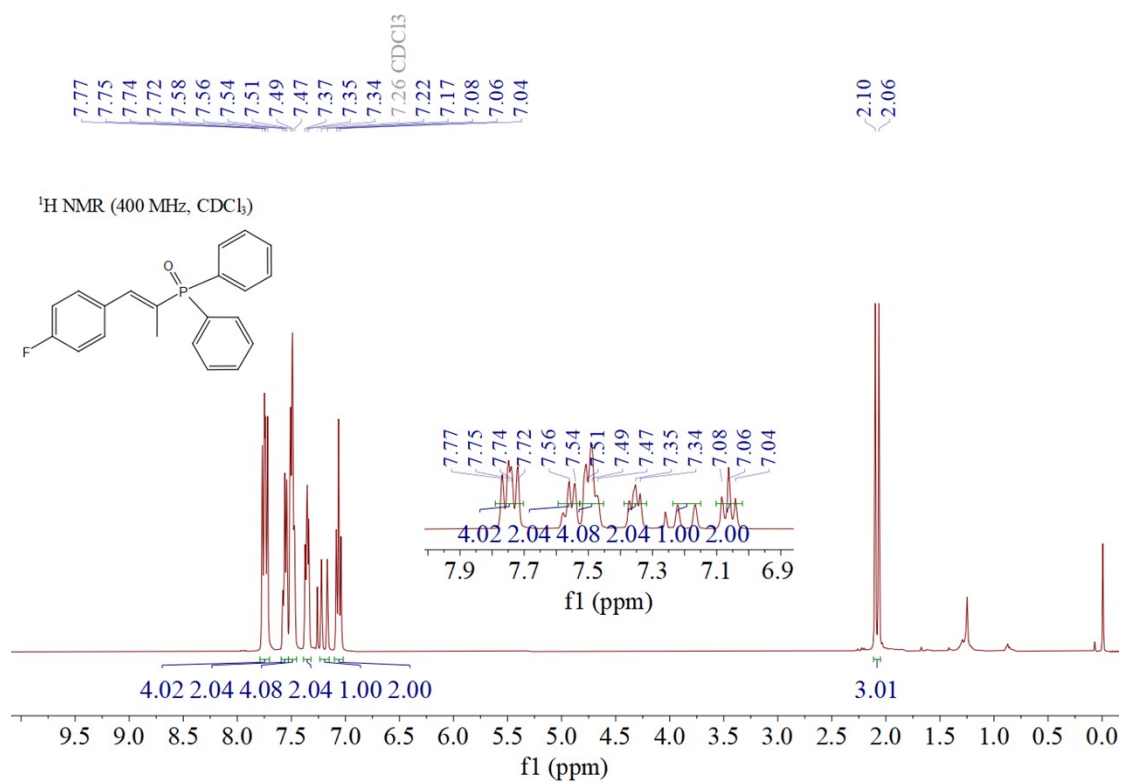

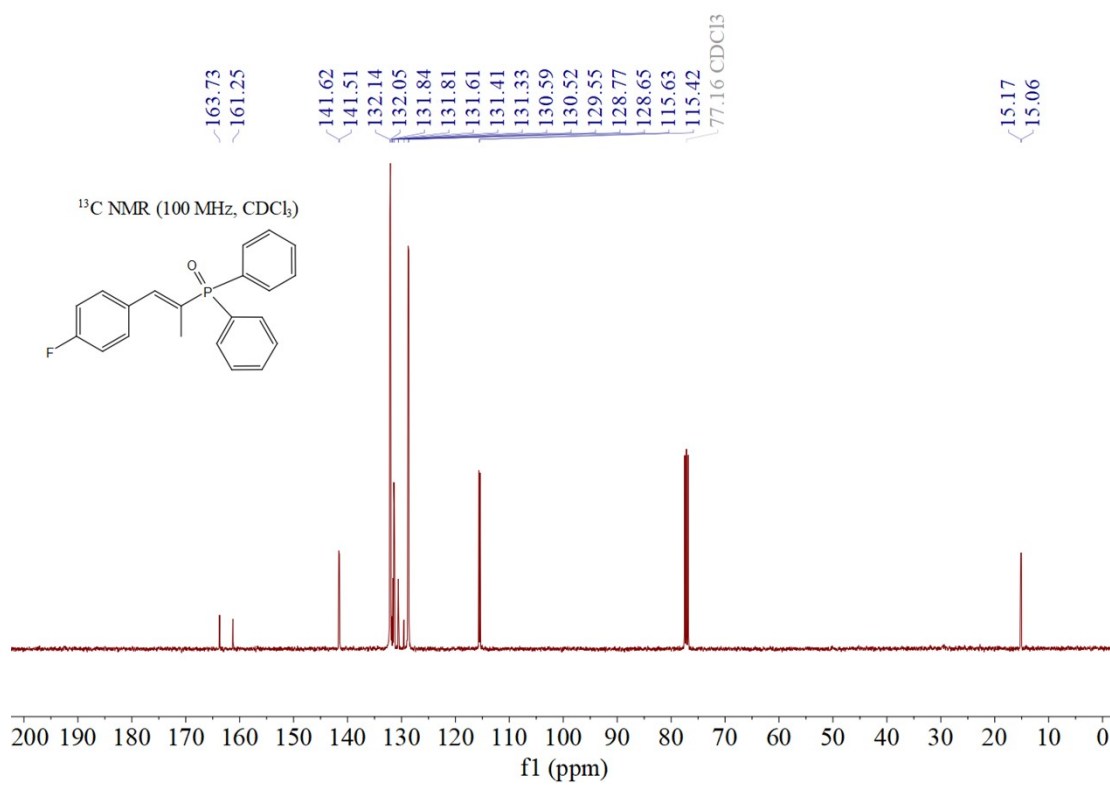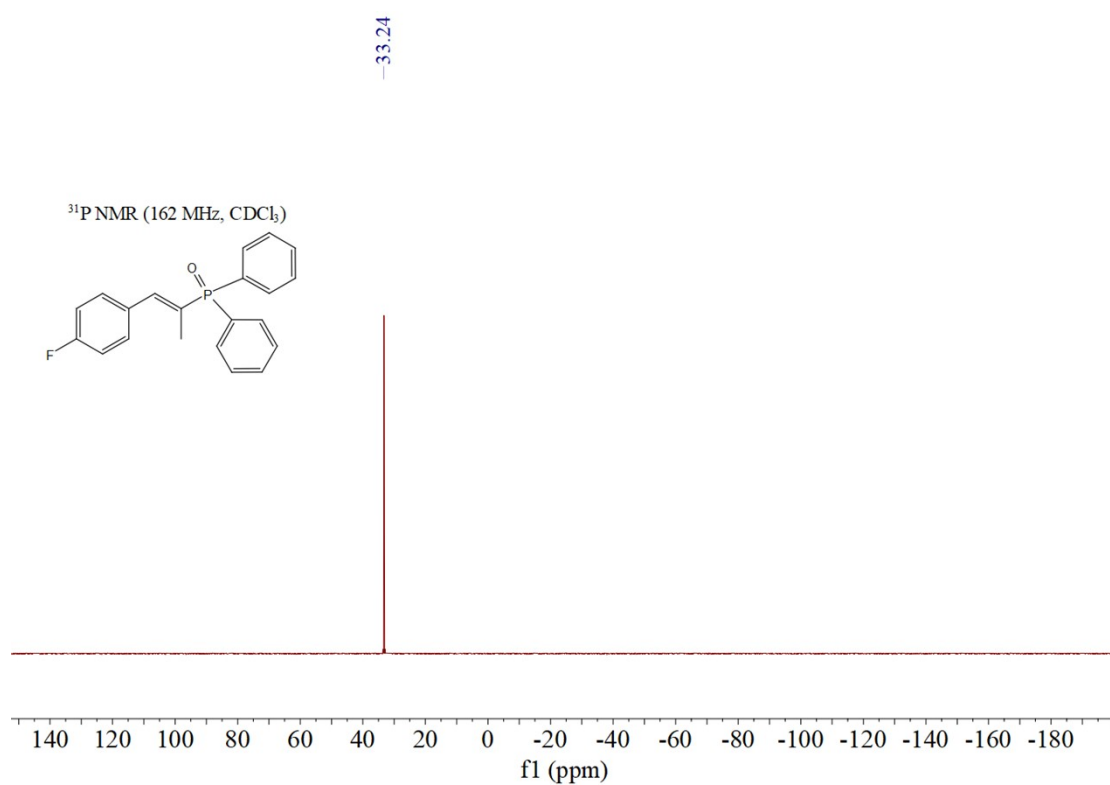

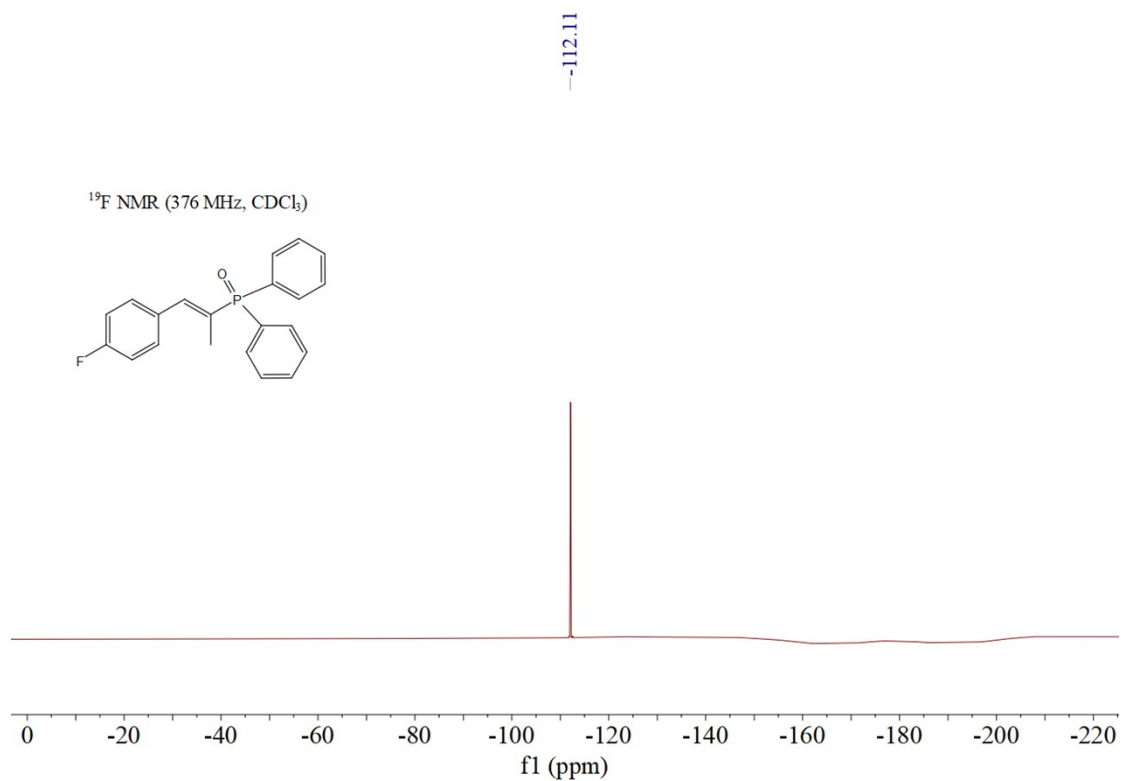

(*E*)-(1-(4-chlorophenyl)prop-1-en-2-yl)diphenylphosphine oxide (**3h**)

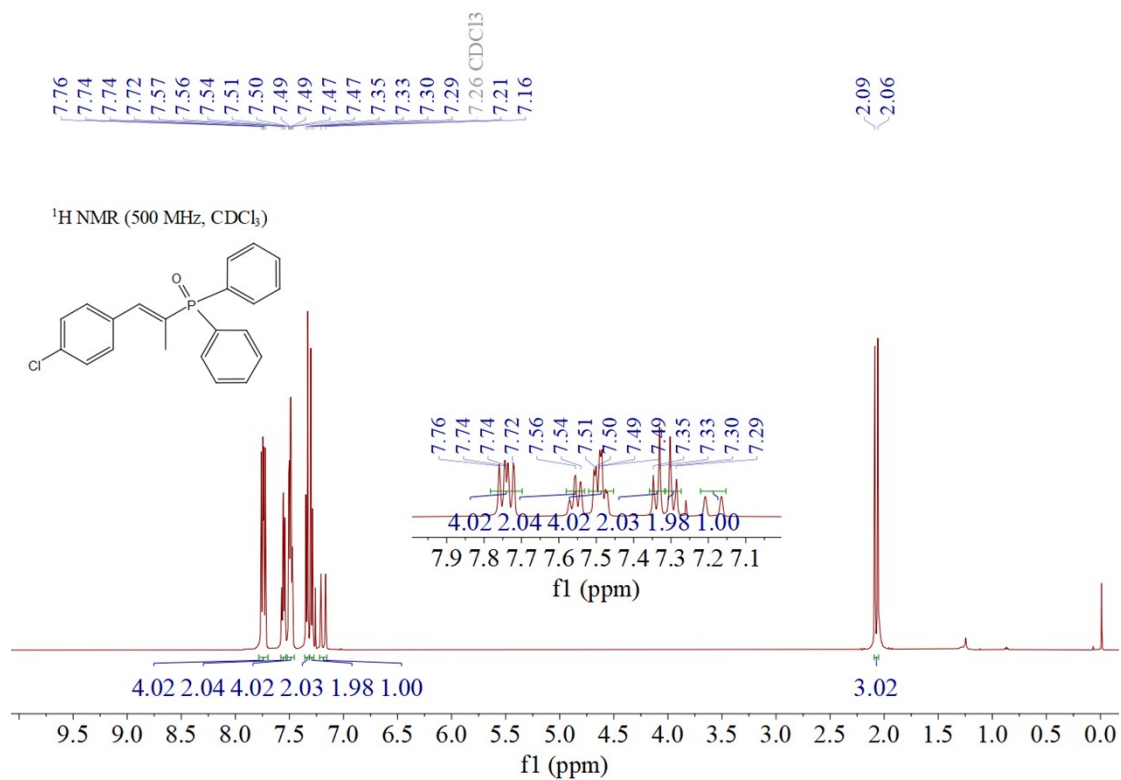

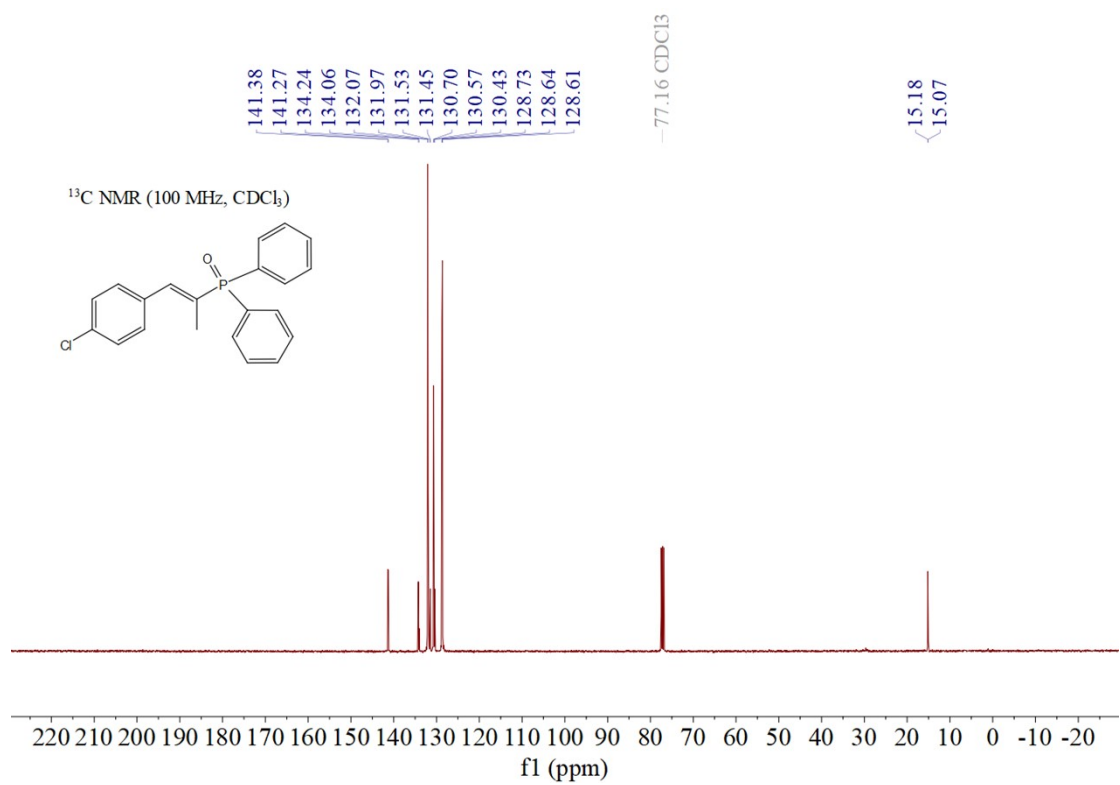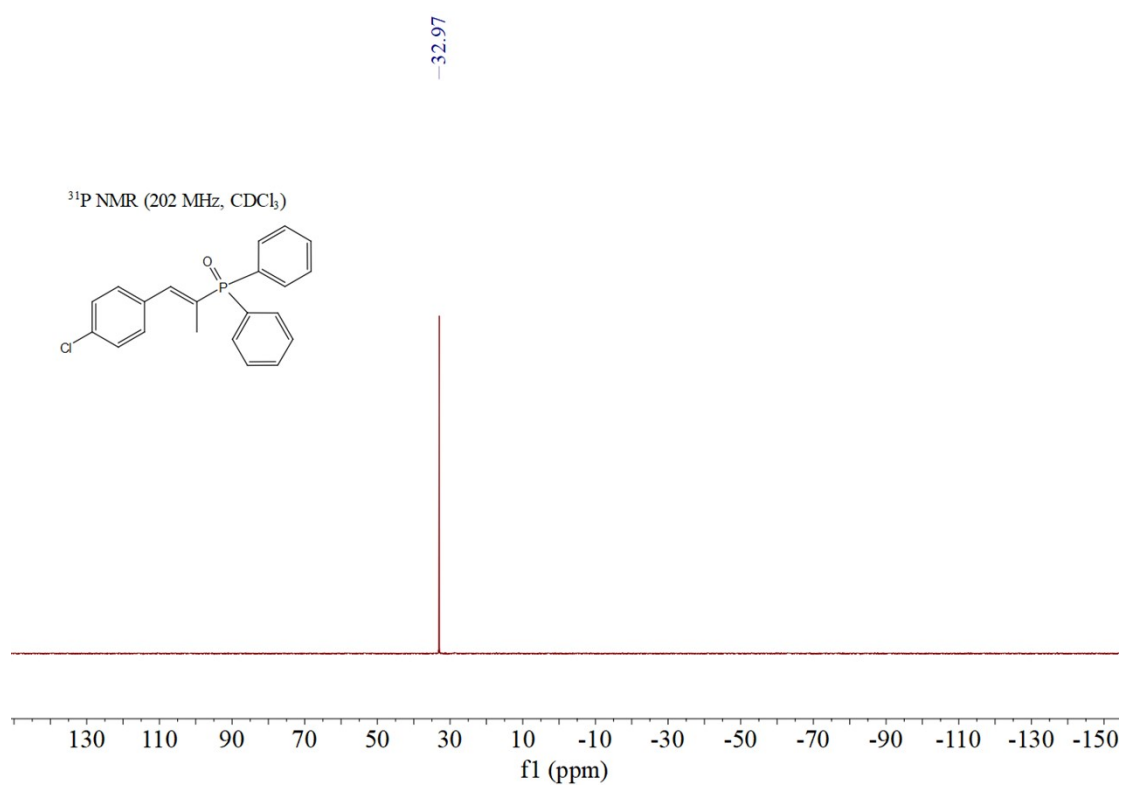

**(E)-(1-(3-chlorophenyl)prop-1-en-2-yl)diphenylphosphine oxide (3i)**

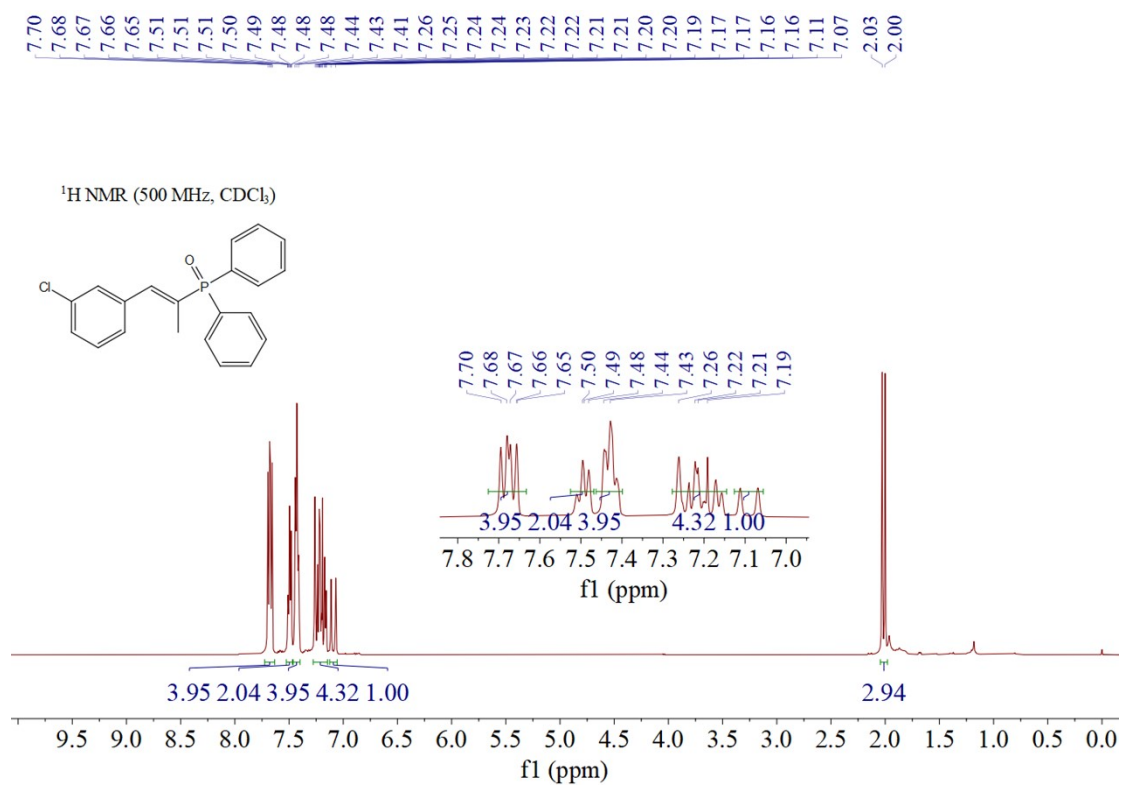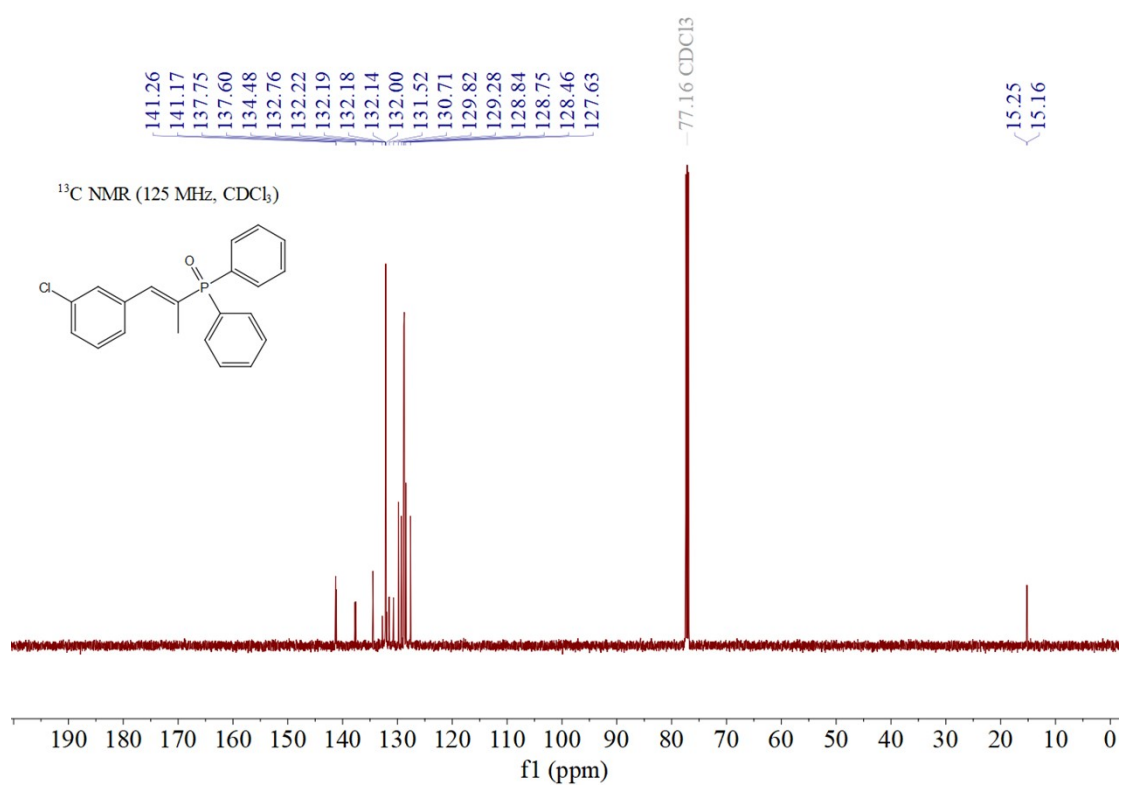

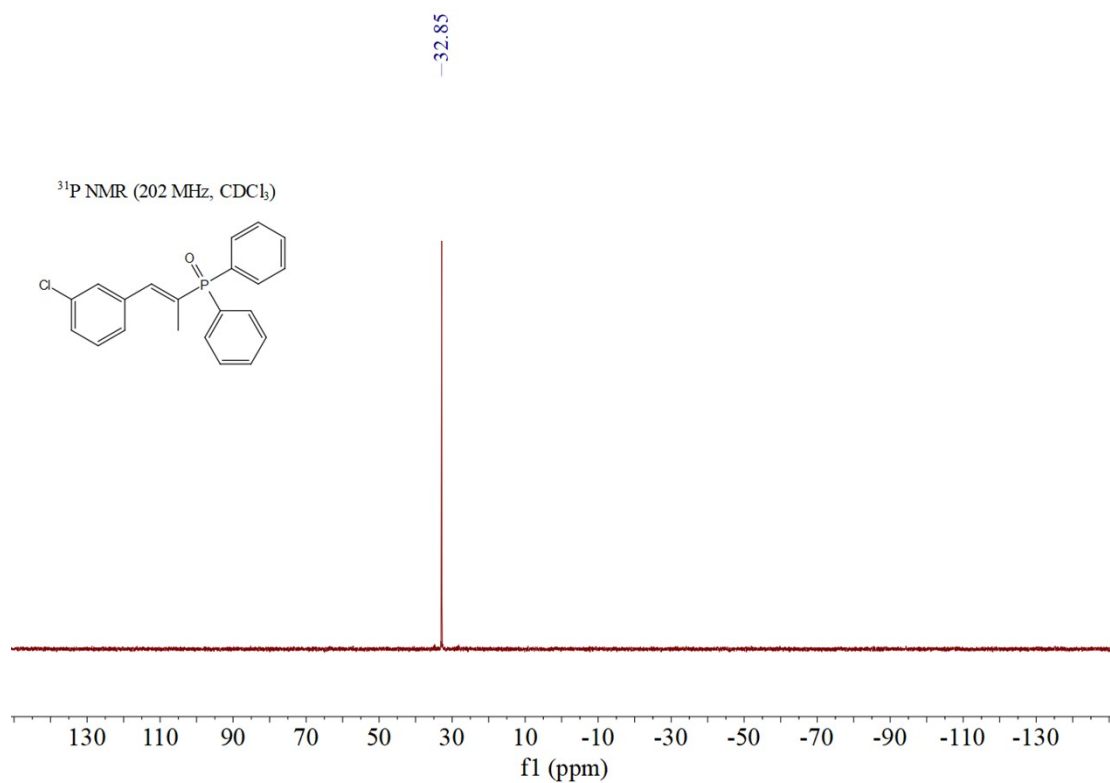

(*E*)-(1-(2-chlorophenyl)prop-1-en-2-yl)diphenylphosphine oxide (**3j**)

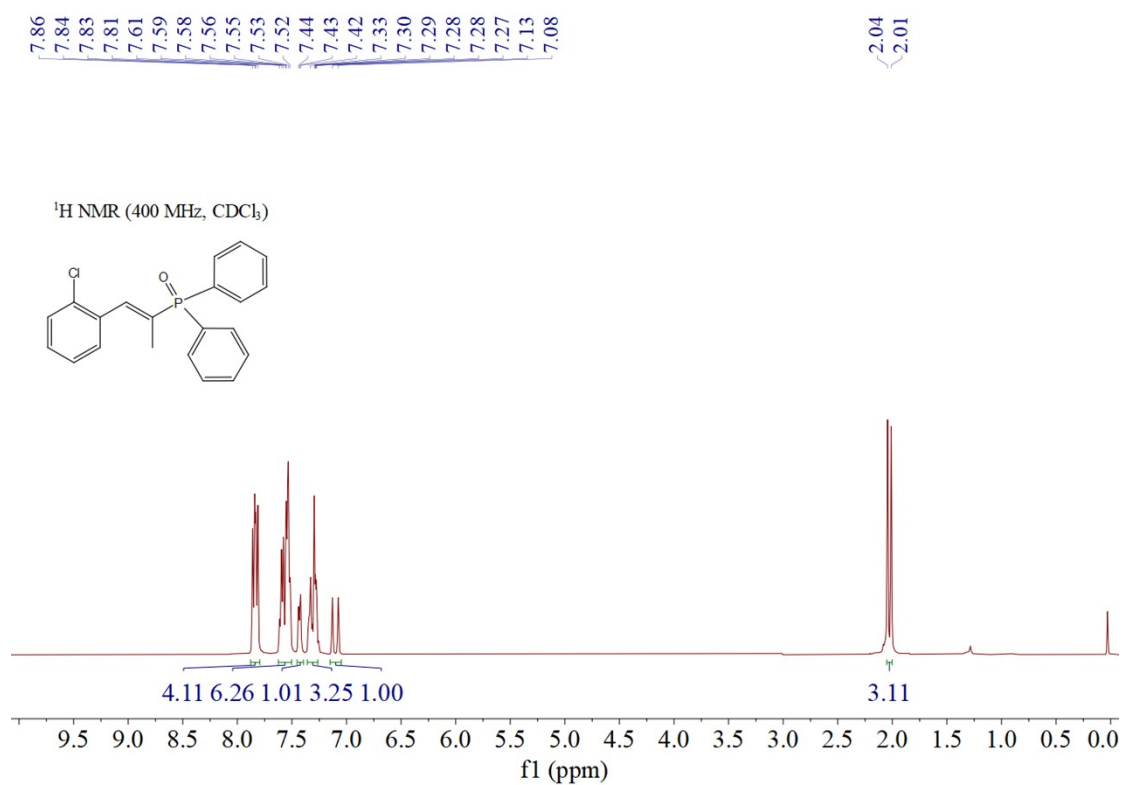

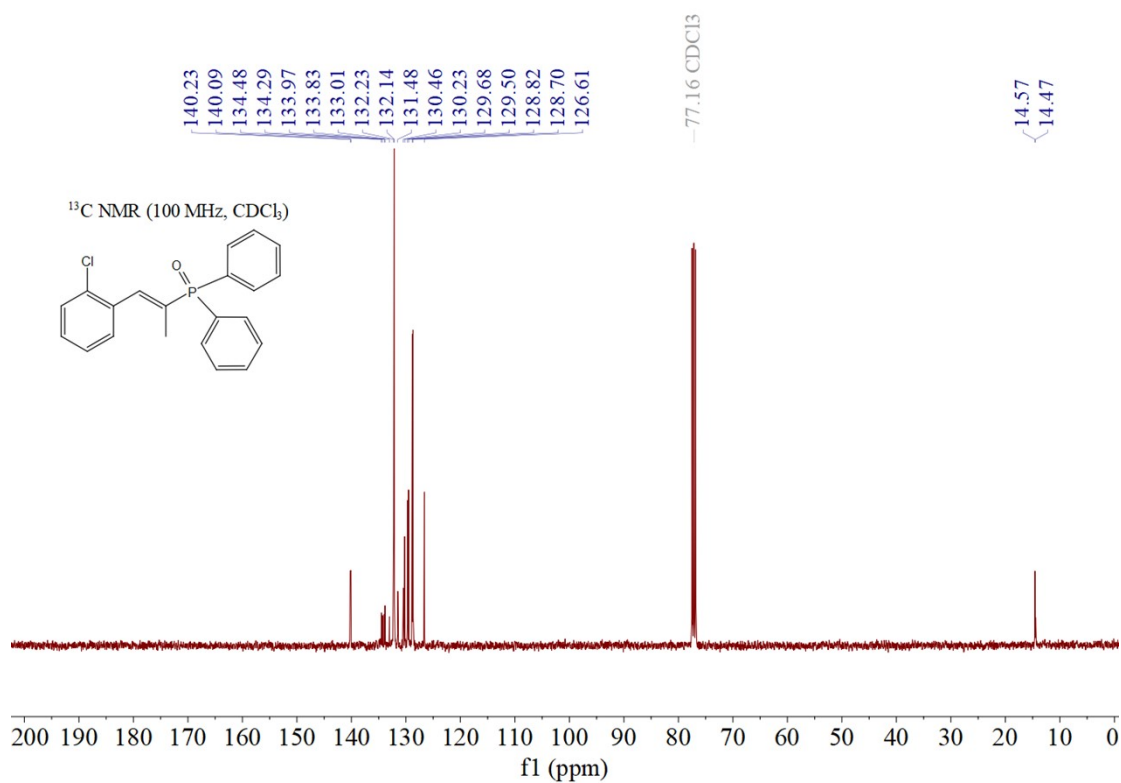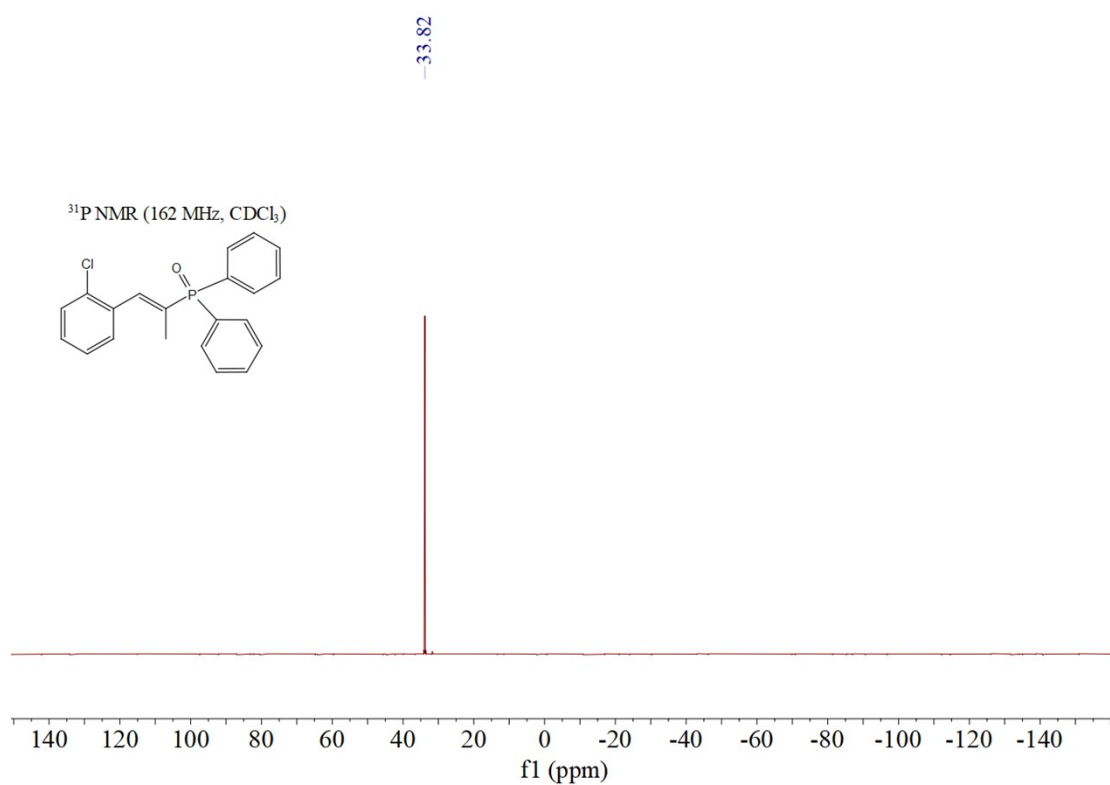

**(E)-(1-(naphthalen-2-yl)prop-1-en-2-yl)diphenylphosphine oxide (3k)**

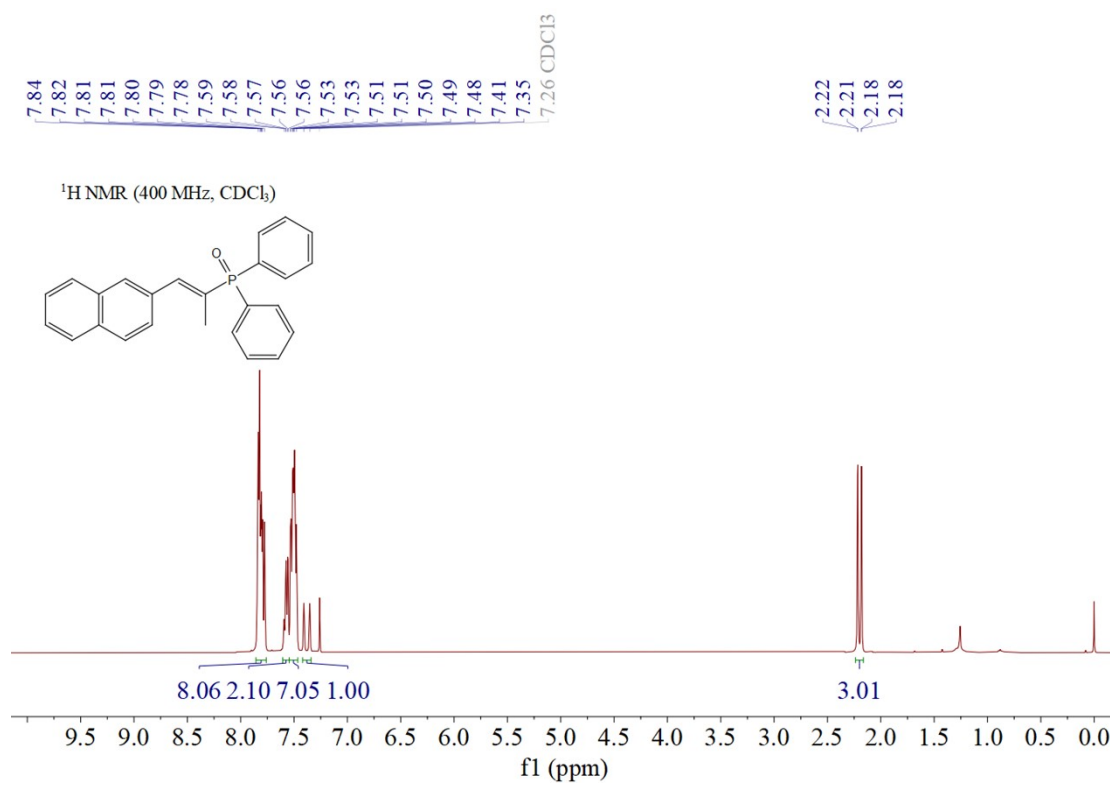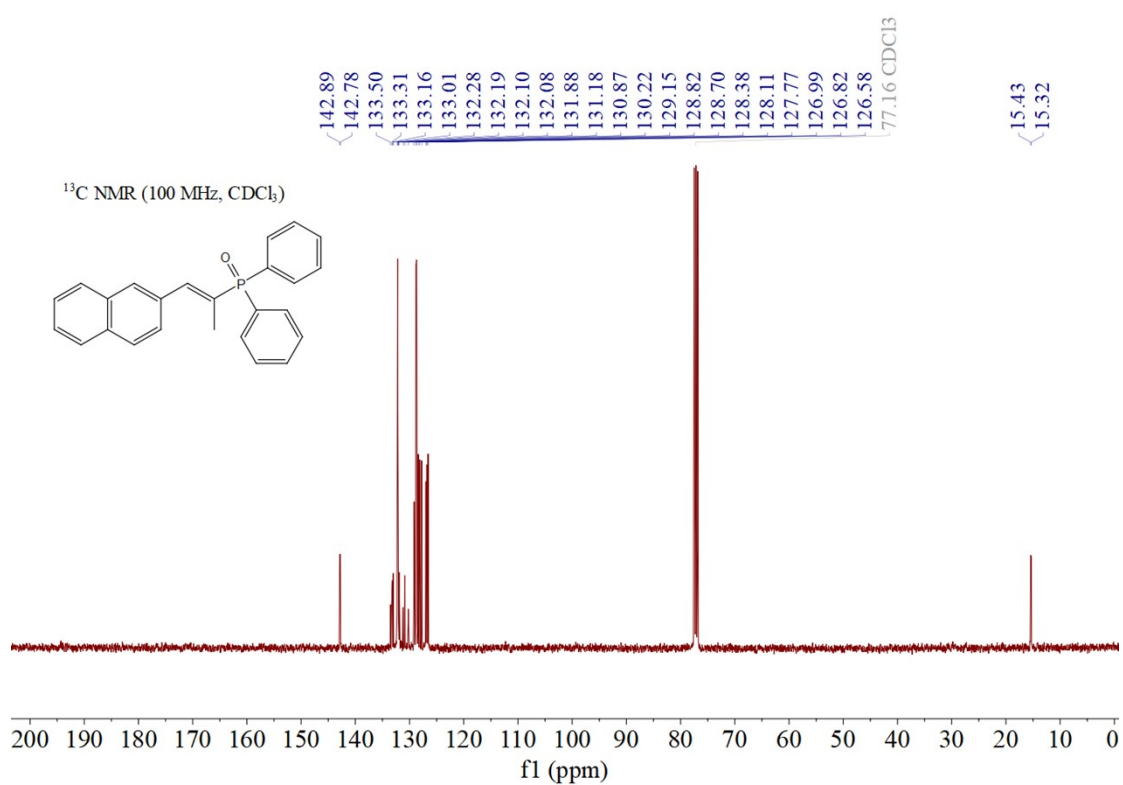



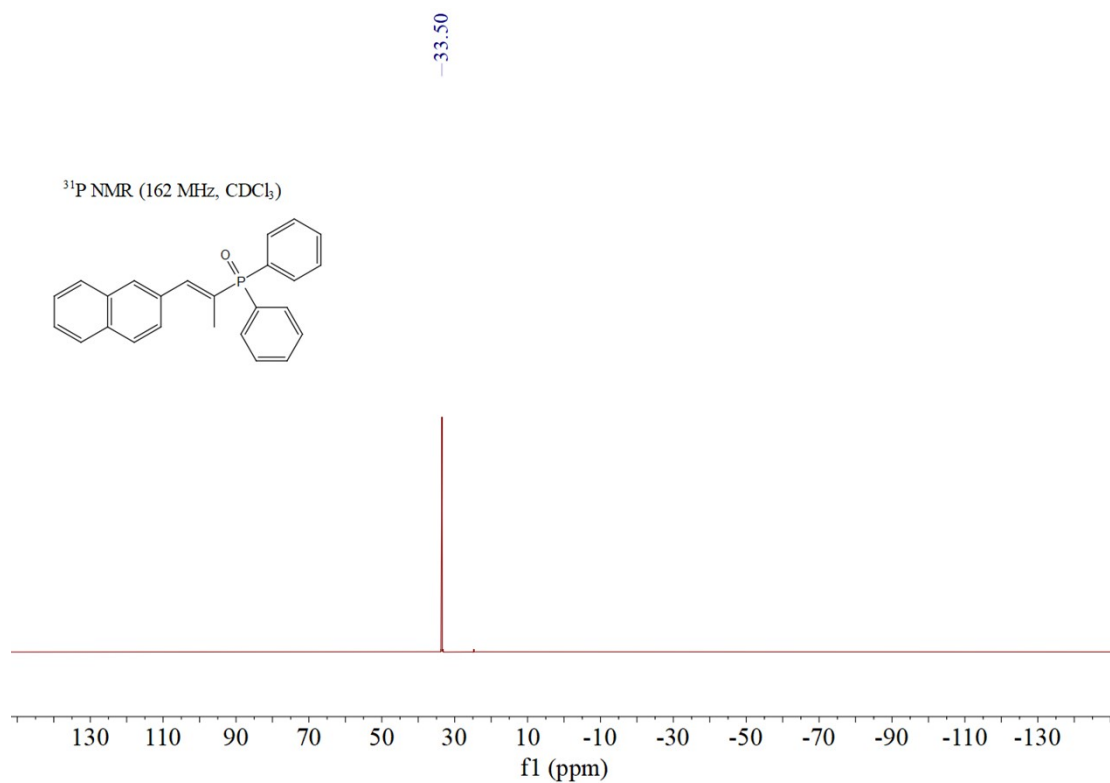

(*E*)-diphenyl(1-(thiophen-2-yl)prop-1-en-2-yl)phosphine oxide (**31**)

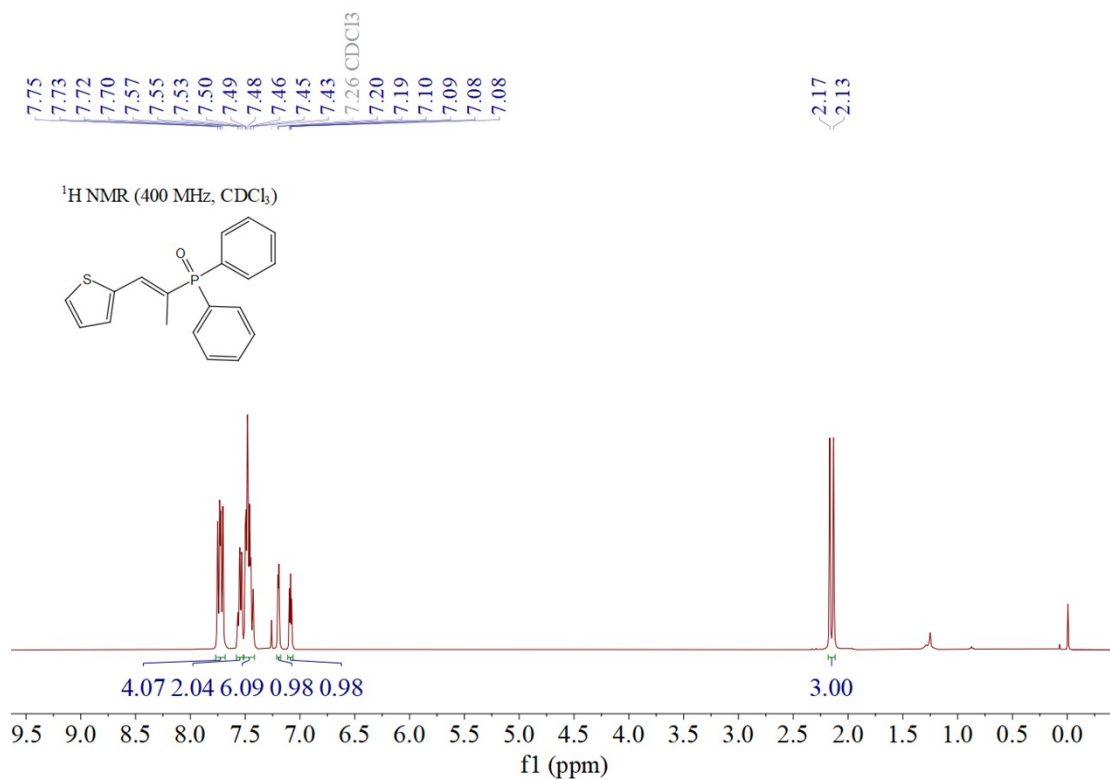

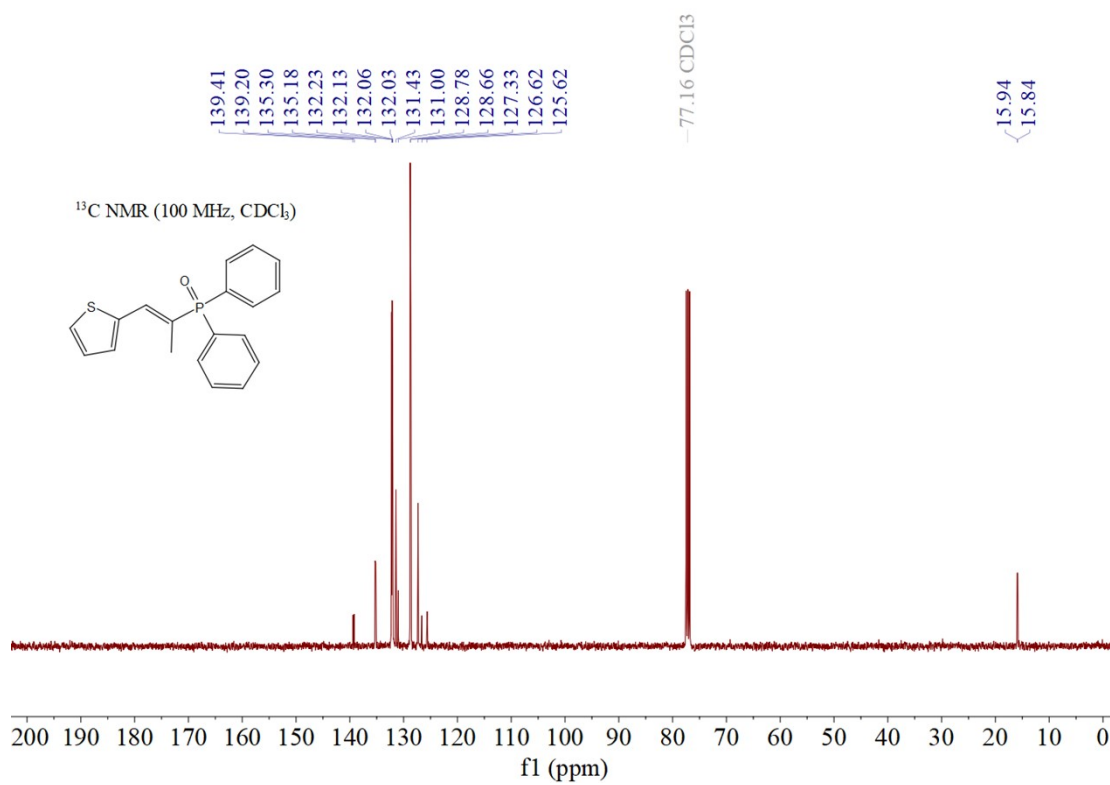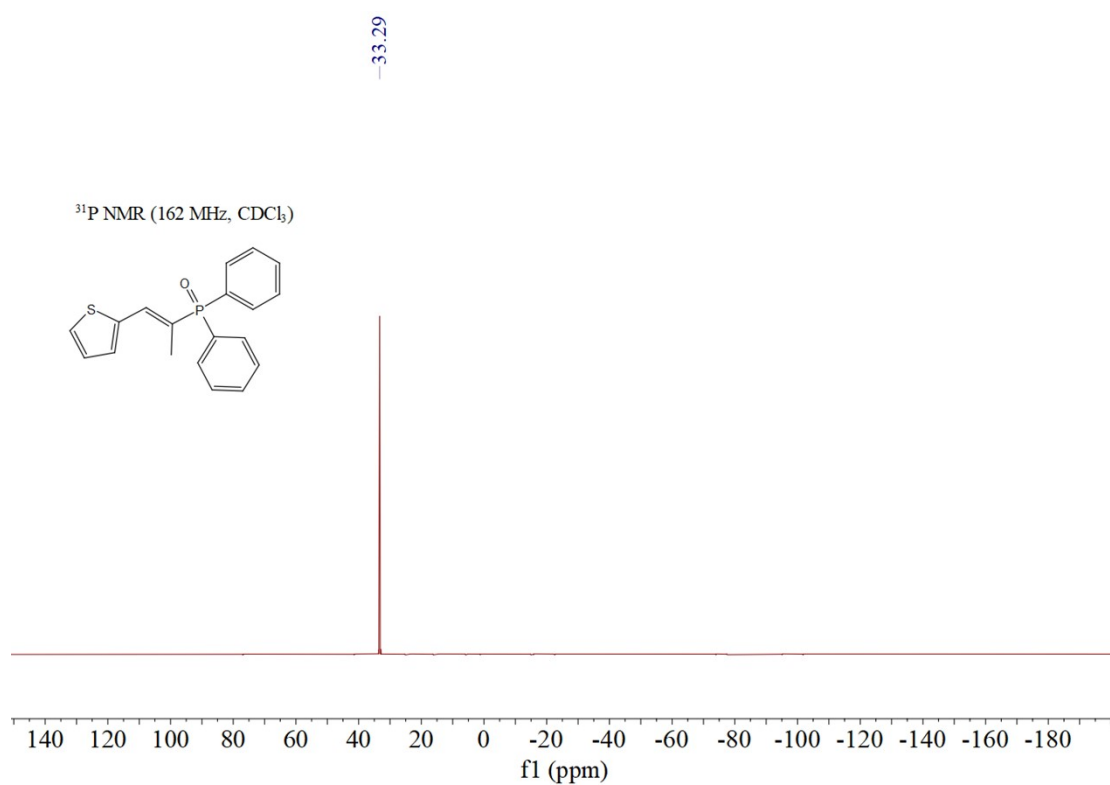

(1,1-di-p-tolylprop-1-en-2-yl)diphenylphosphine oxide (**3m**)

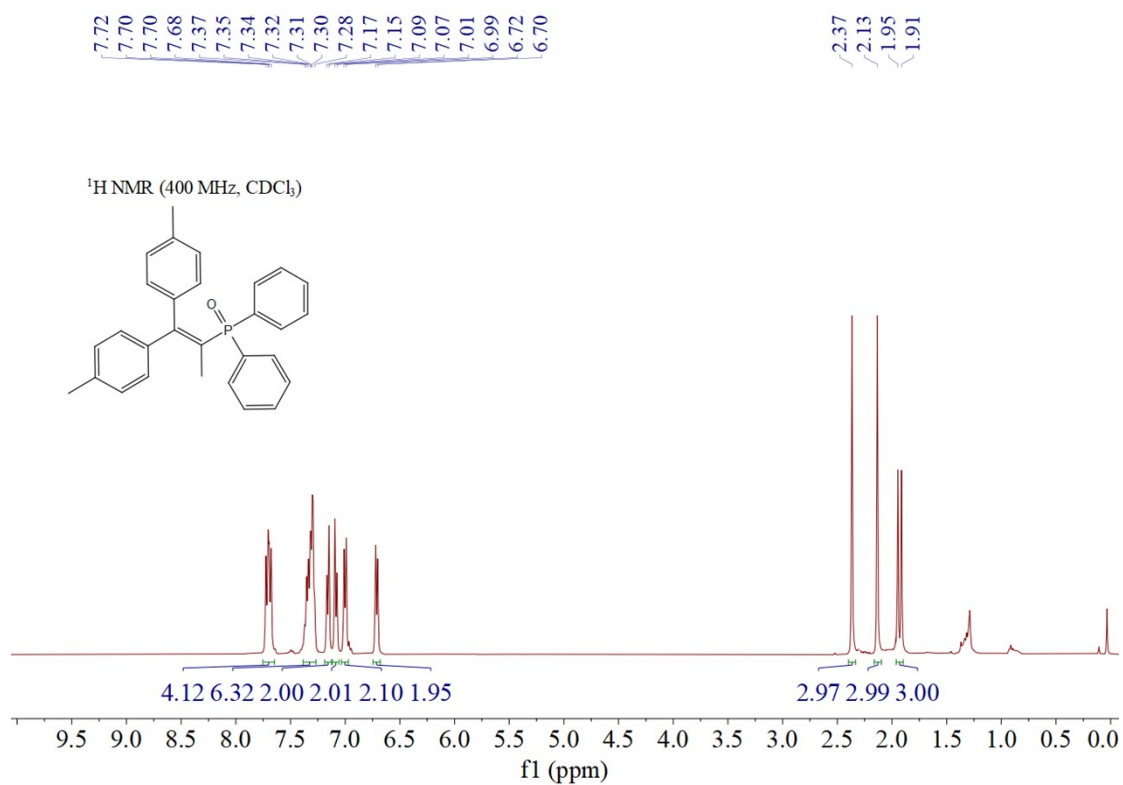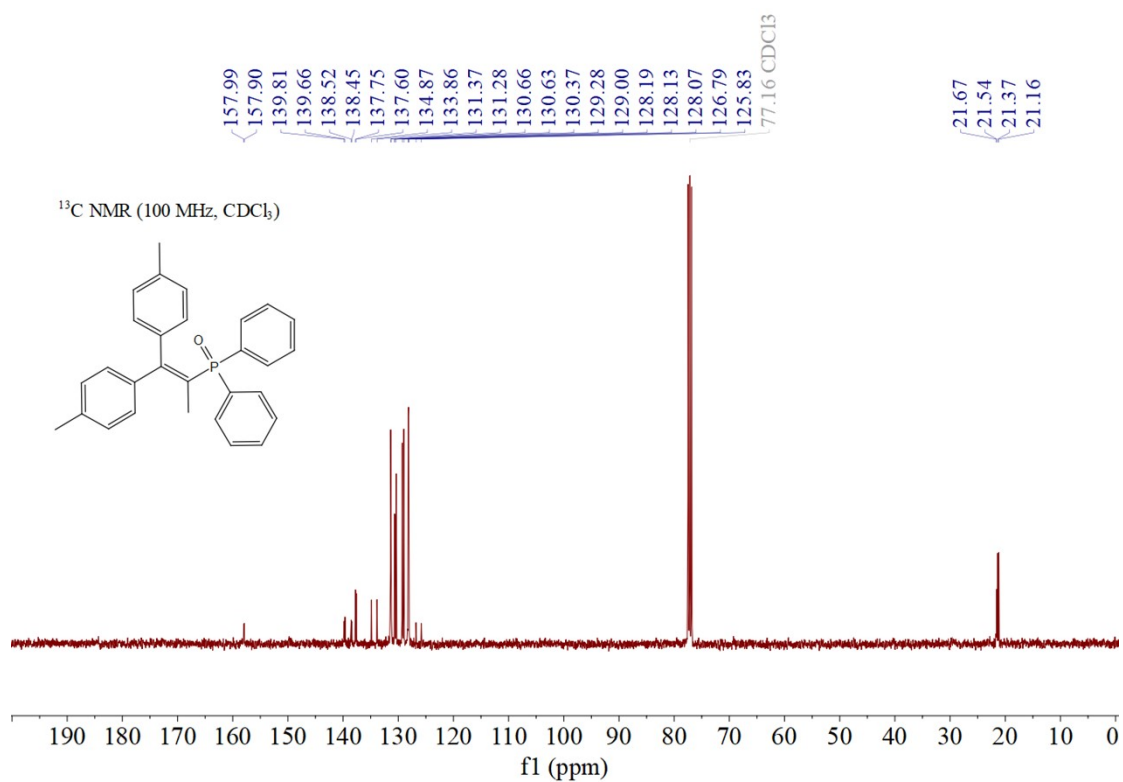

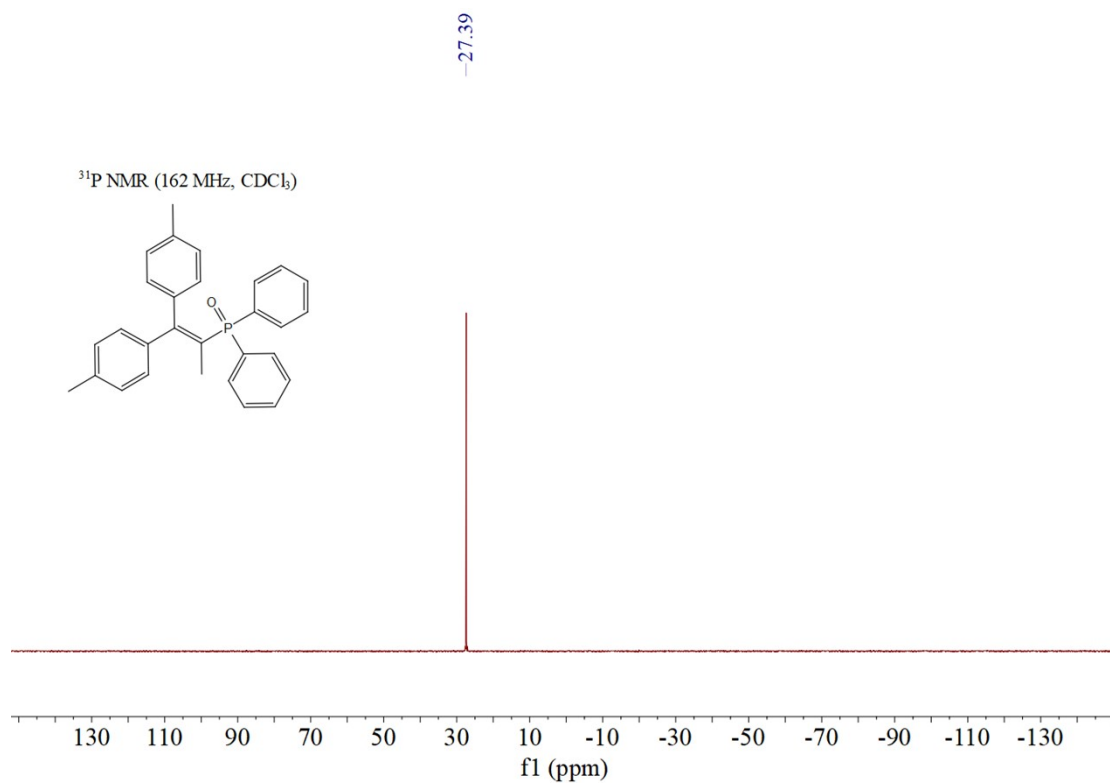

(*E*)-(1-phenylprop-1-en-2-yl)di-*p*-tolylphosphine oxide (**3n**)

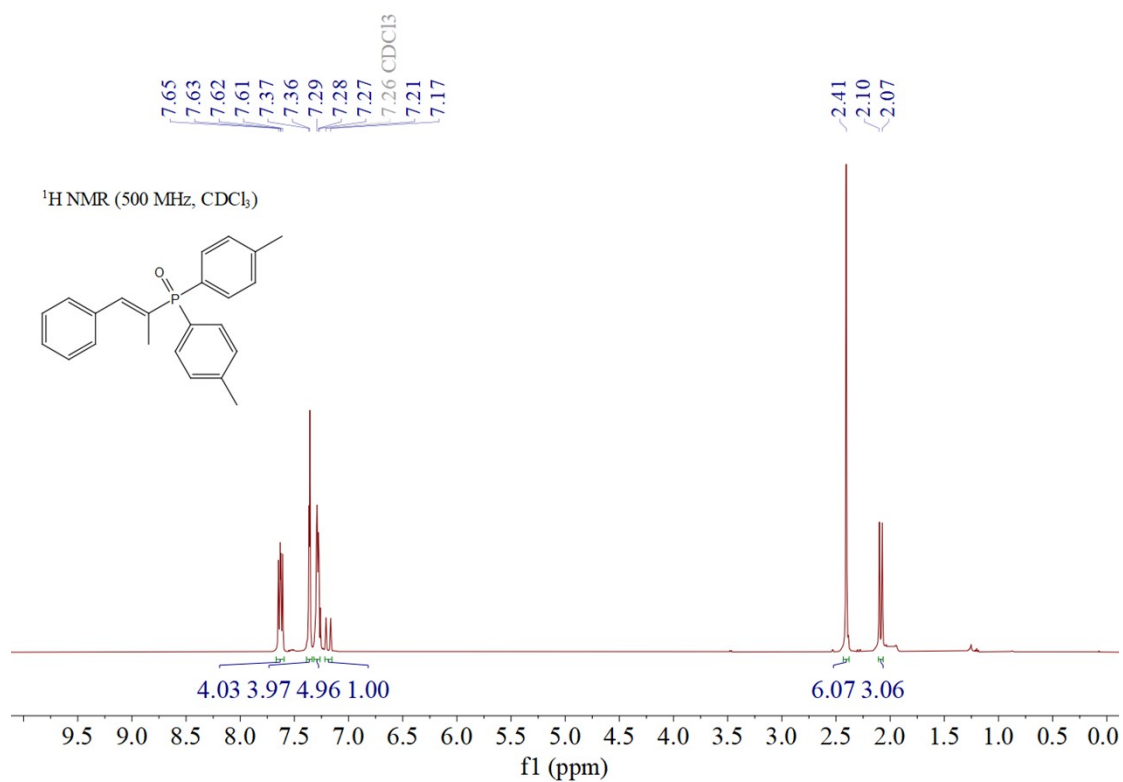

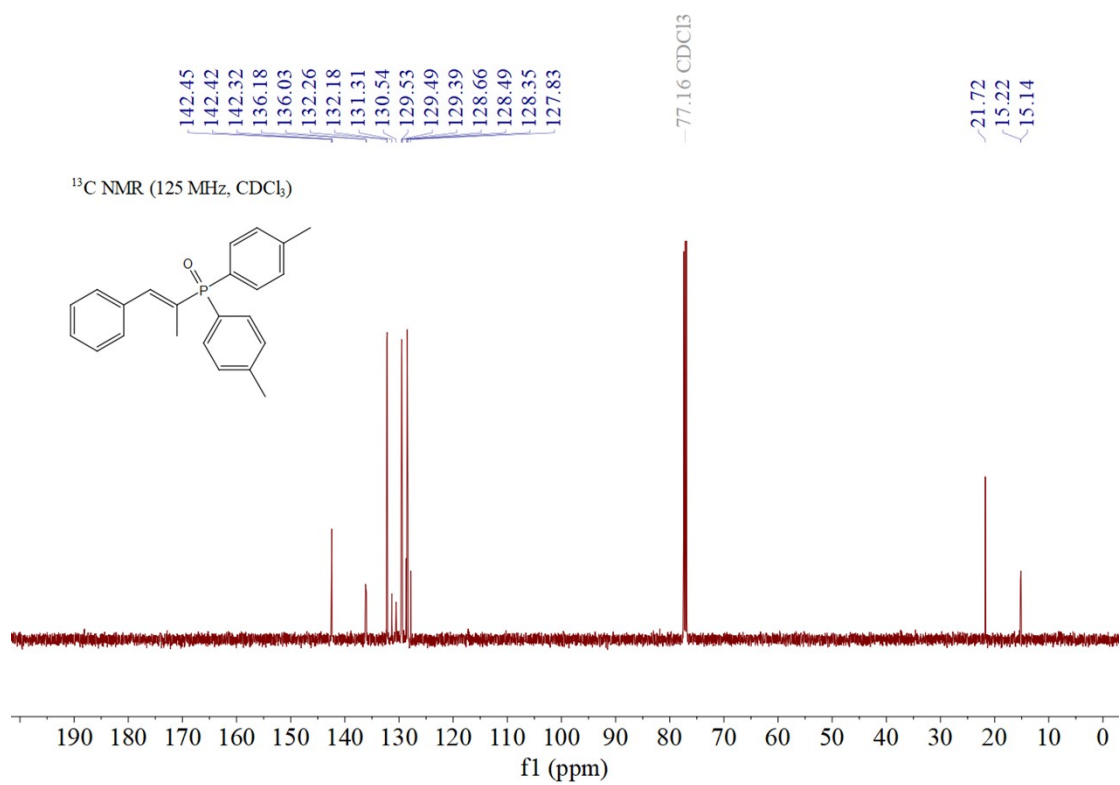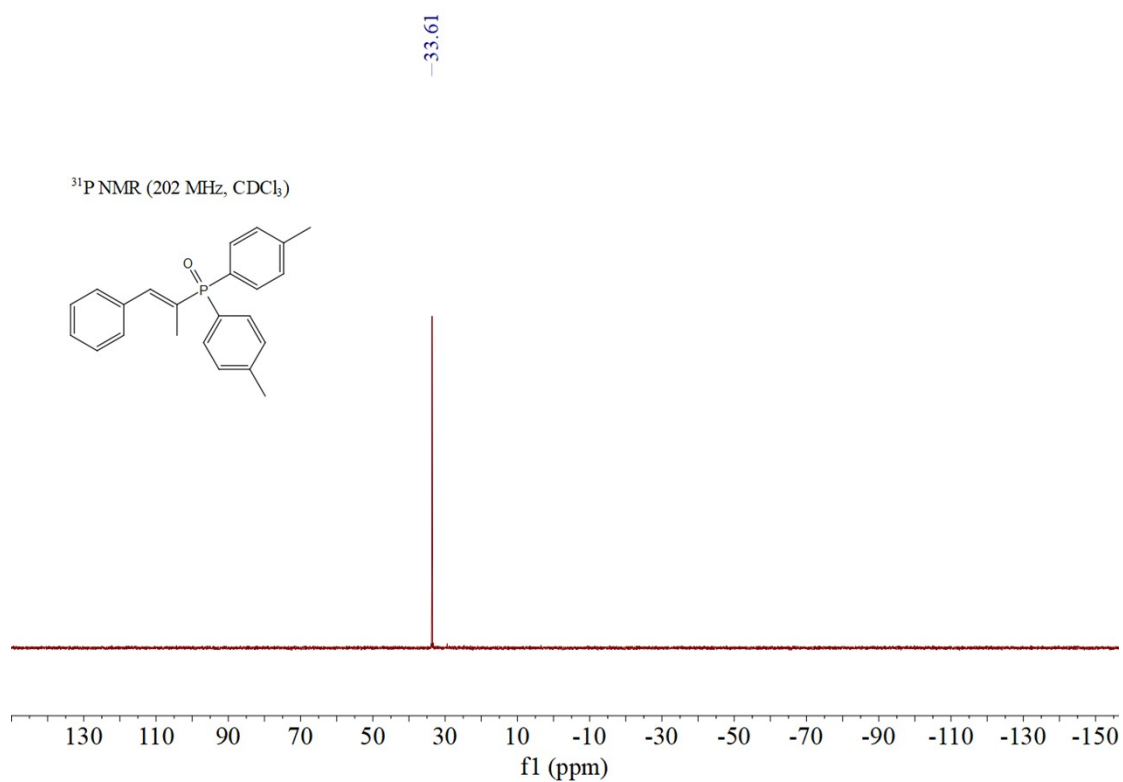

*(E)*-bis(4-chlorophenyl)(1-phenylprop-1-en-2-yl)phosphine oxide (**30**)

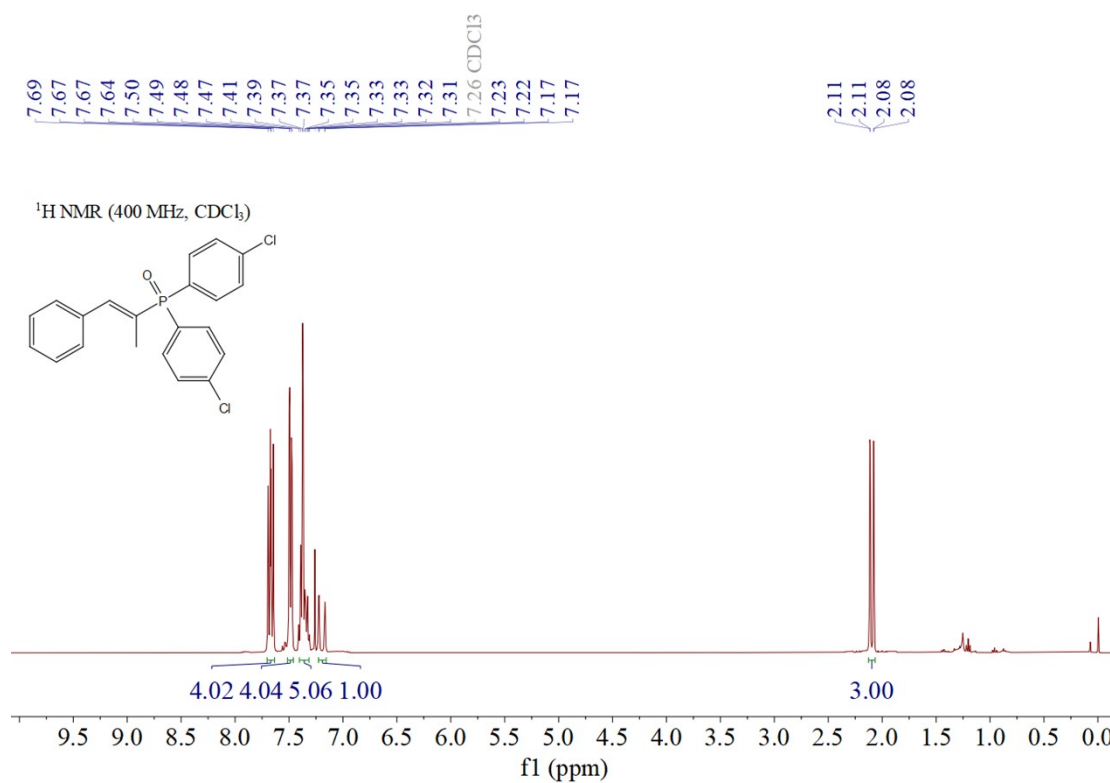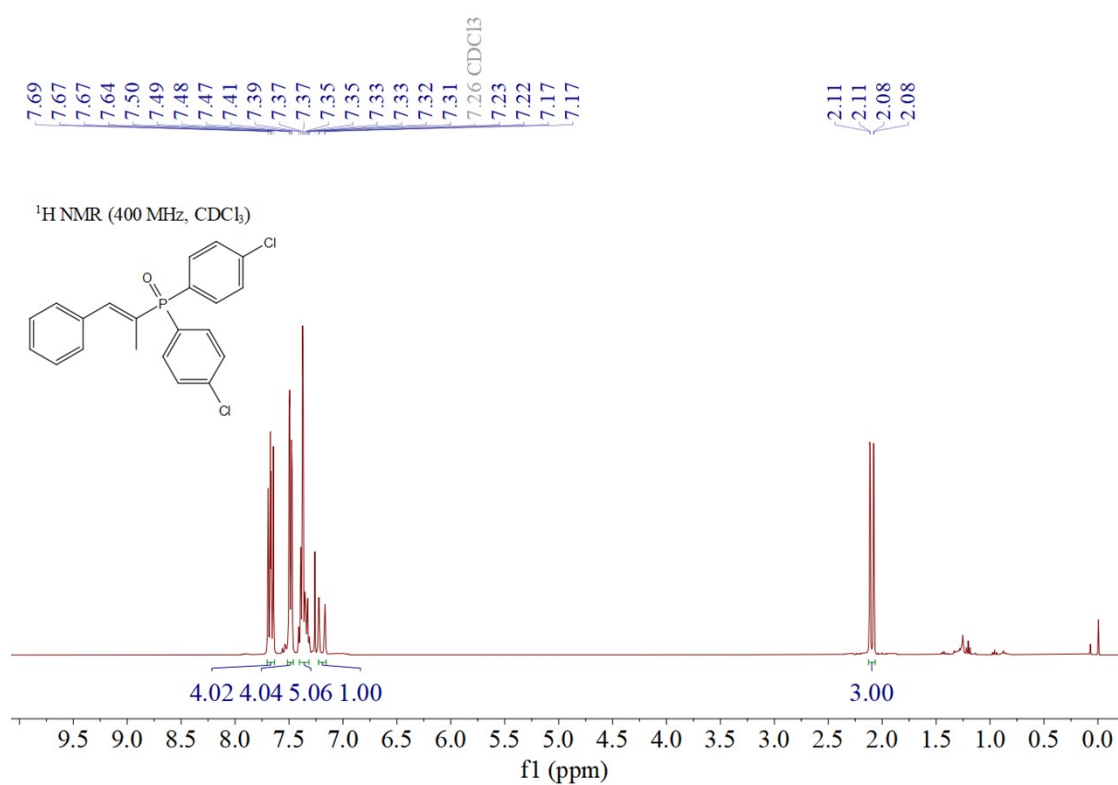

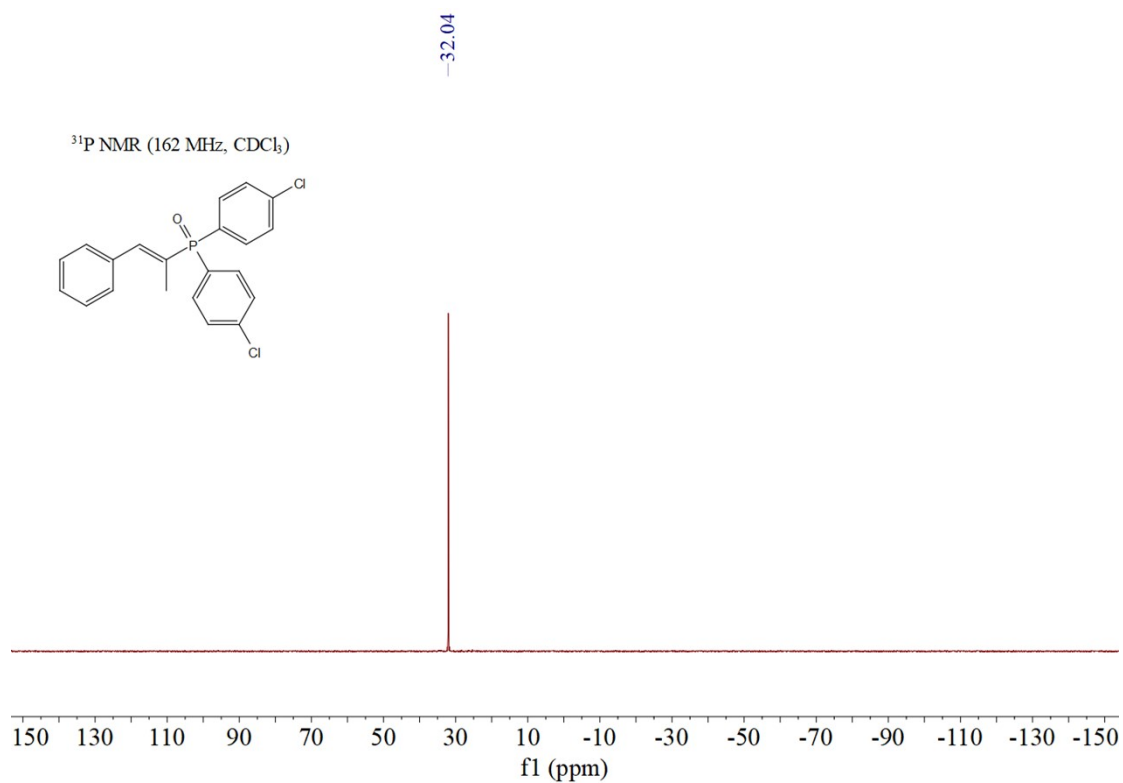

(*E*)-bis(4-bromophenyl)(1-phenylprop-1-en-2-yl)phosphine oxide (**3p**)

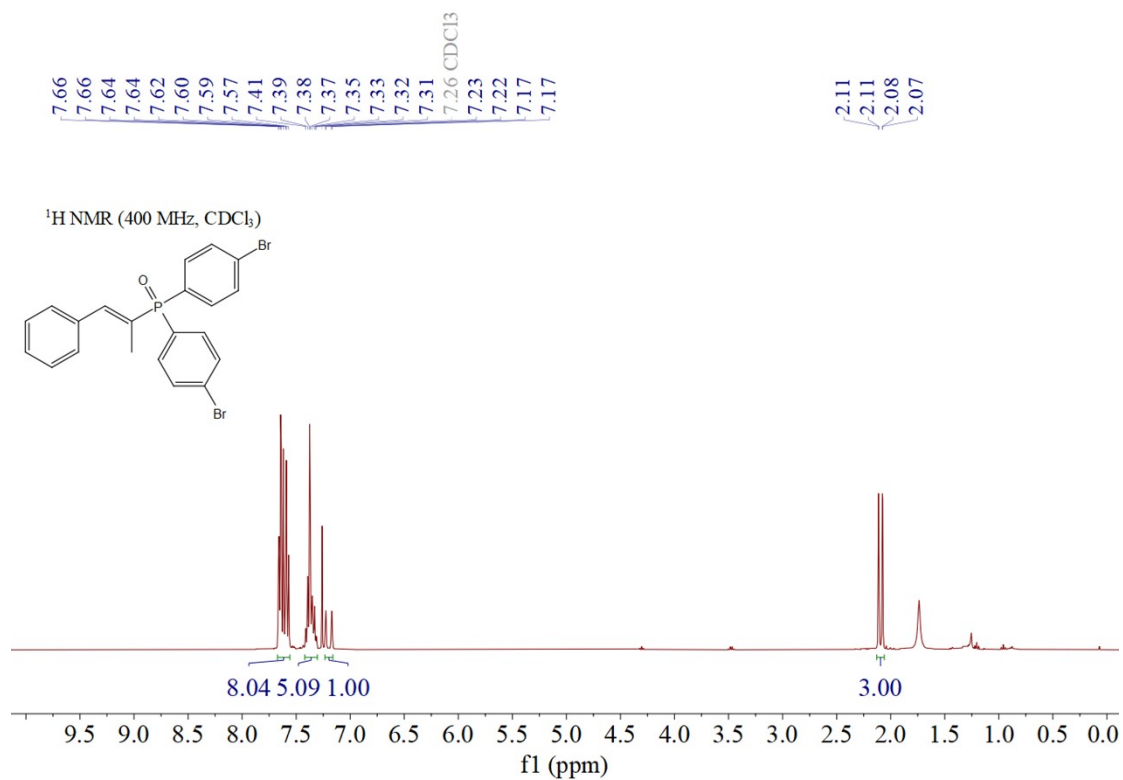

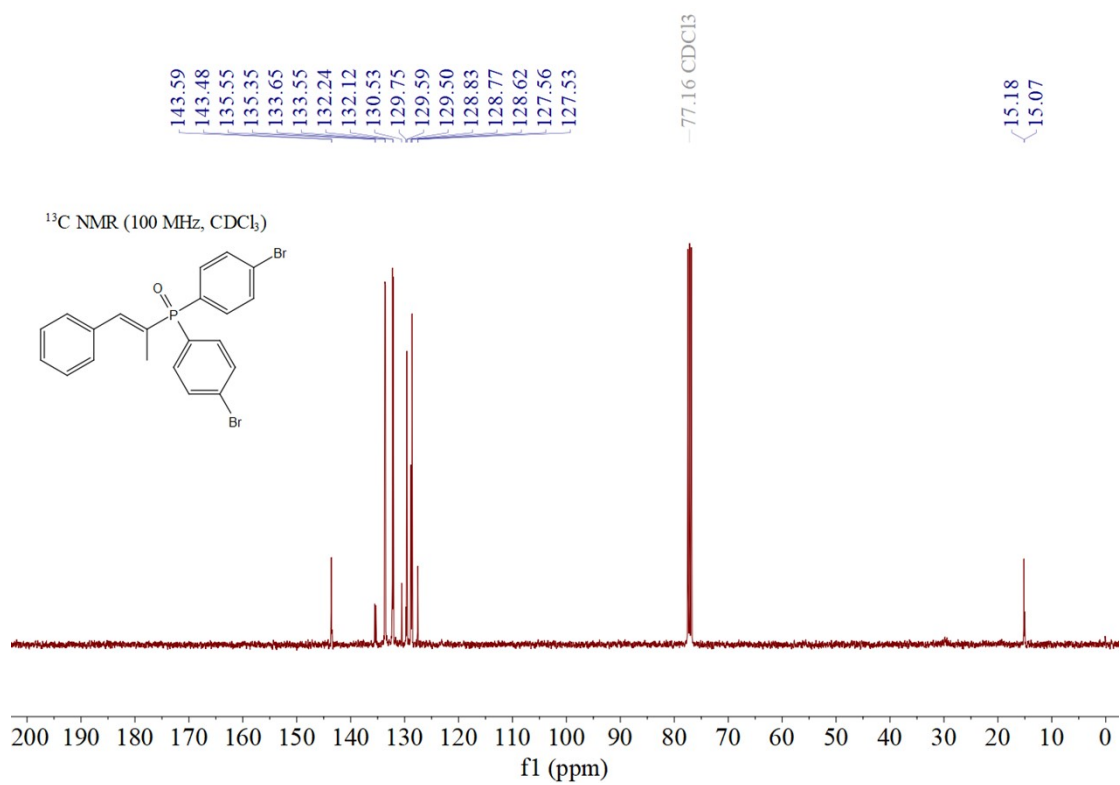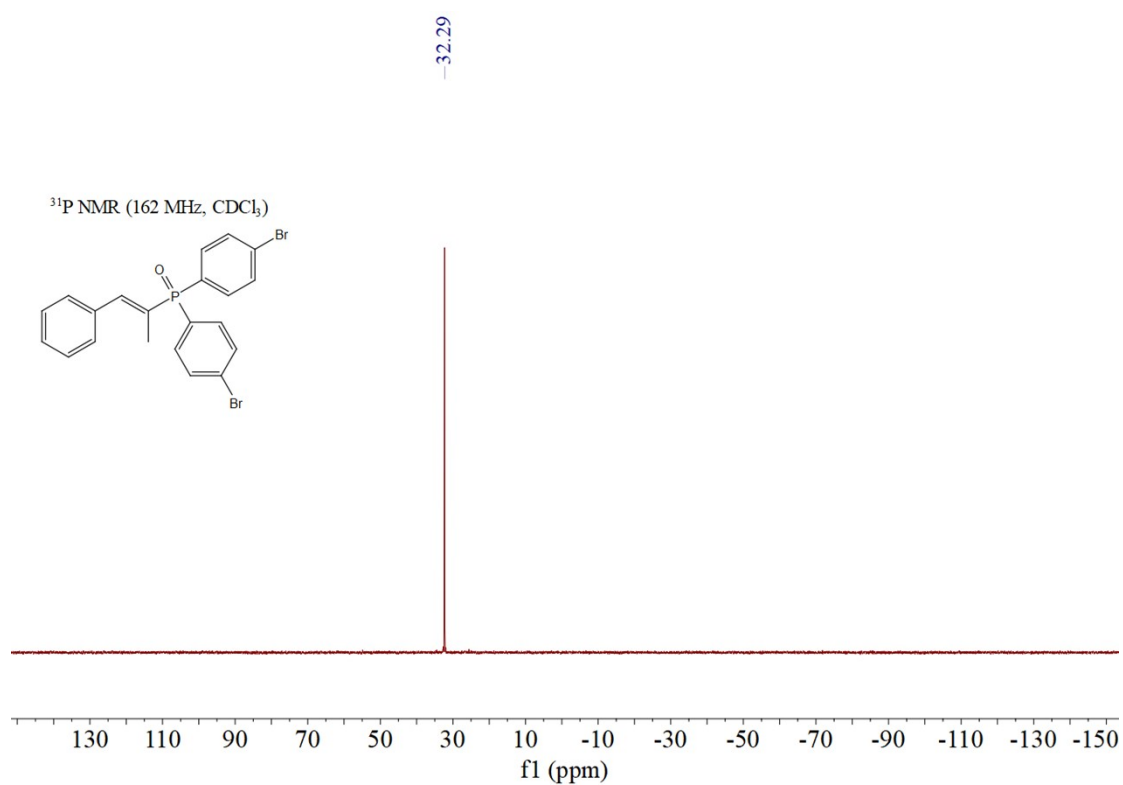

**(E)**-di(naphthalen-1-yl)(1-phenylprop-1-en-2-yl)phosphine oxide (**3q**)



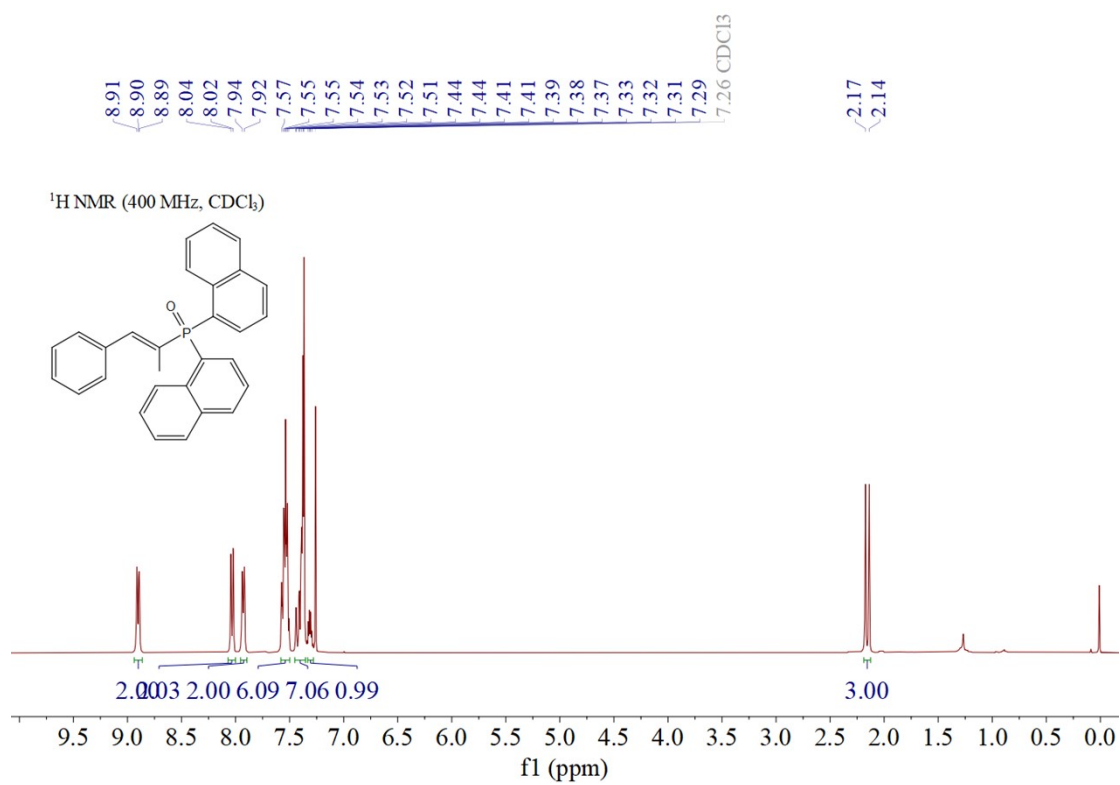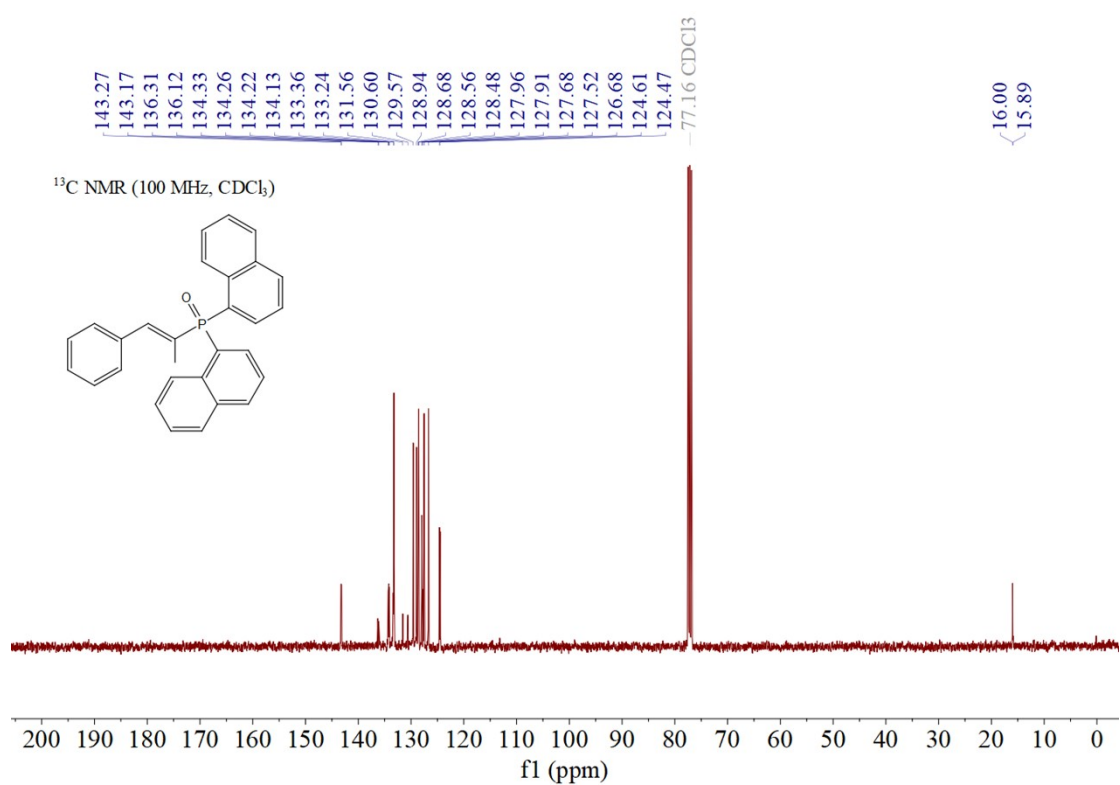

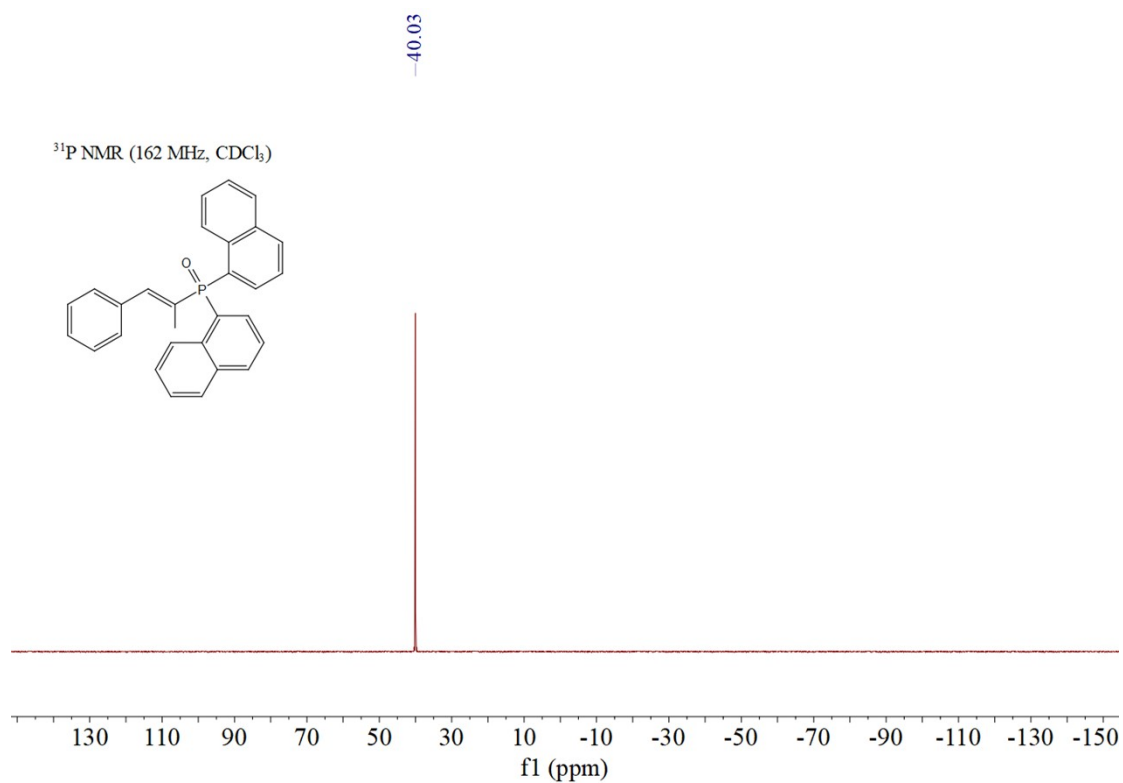

(*E*)-di([1,1'-biphenyl]-4-yl)(1-phenylprop-1-en-2-yl)phosphine oxide (**3r**)

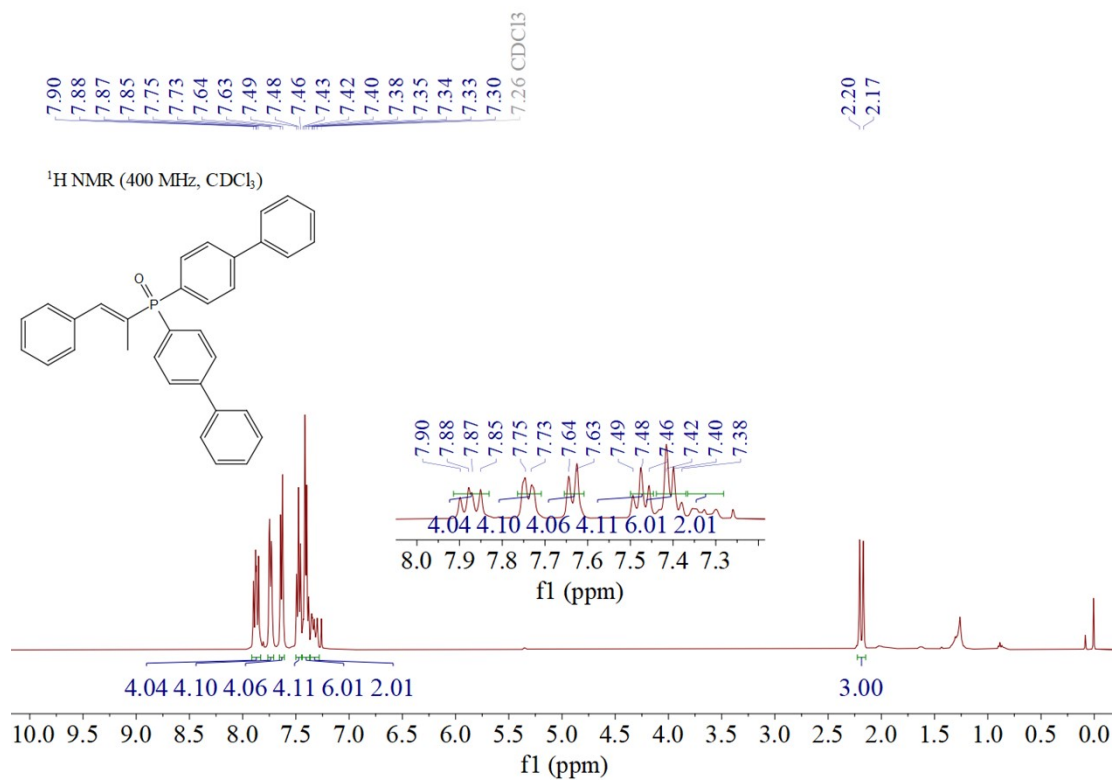

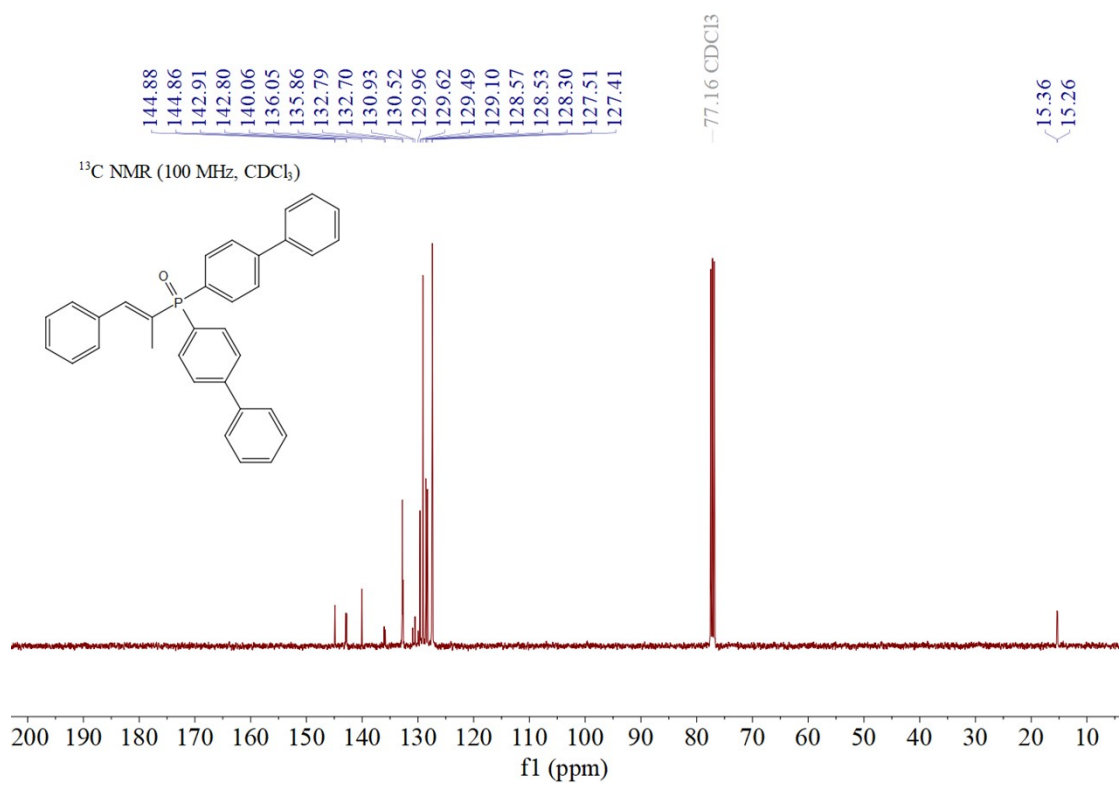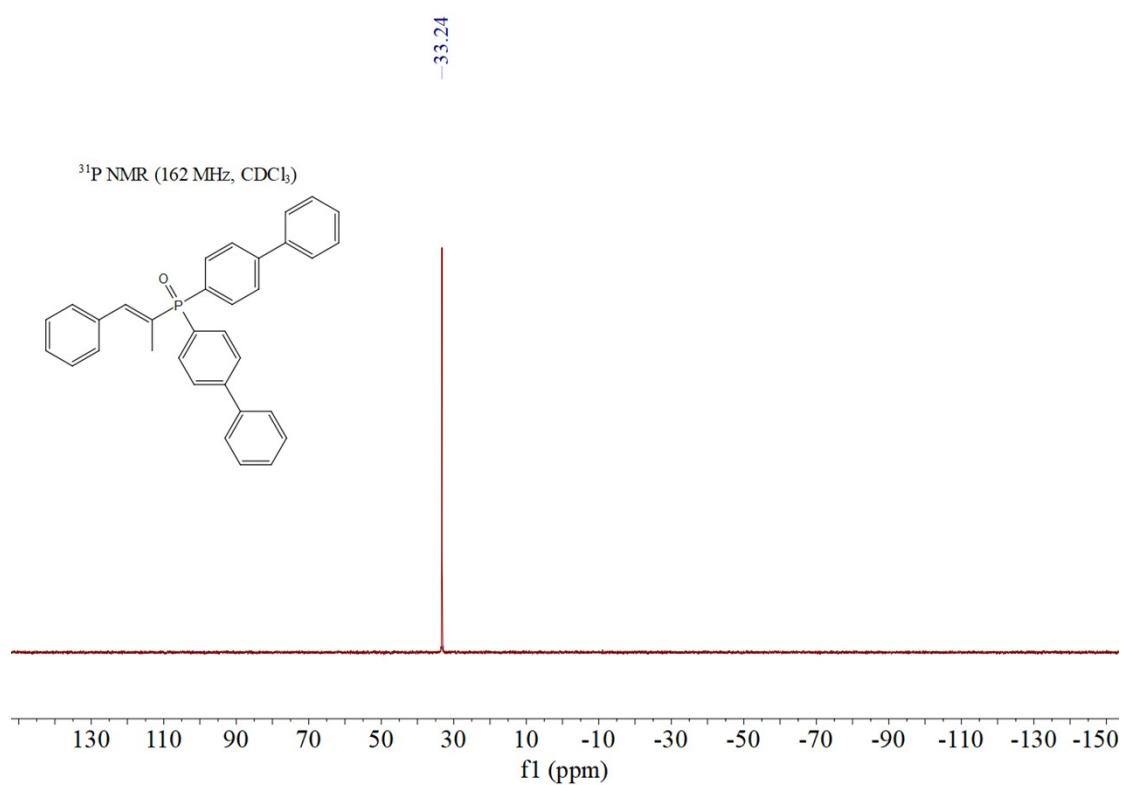

*(E)*-bis(2-methoxyphenyl)(1-phenylprop-1-en-2-yl)phosphine oxide (**3s**)

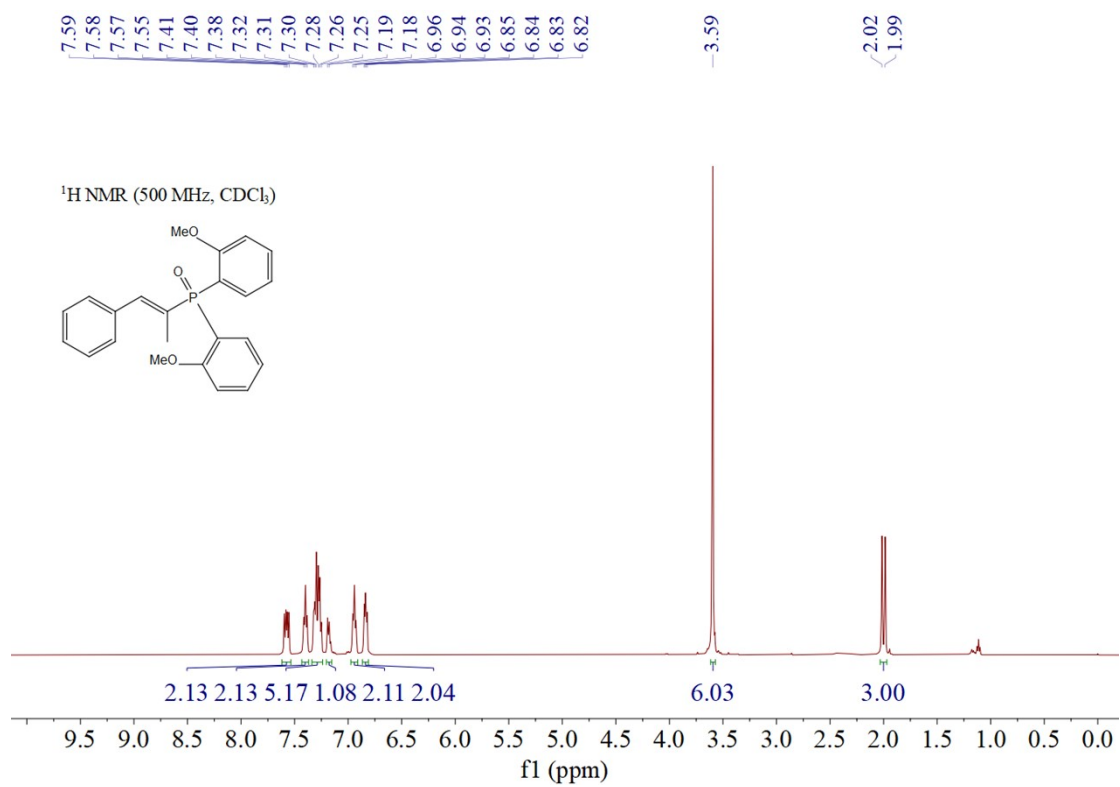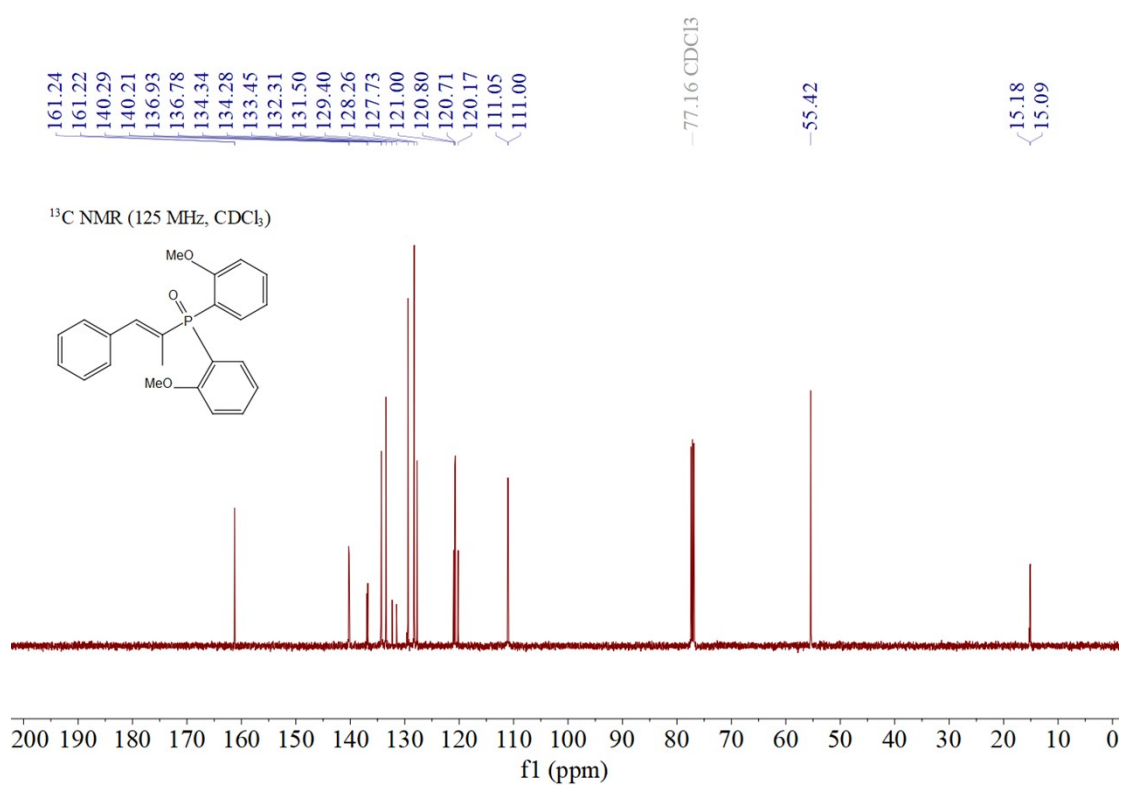

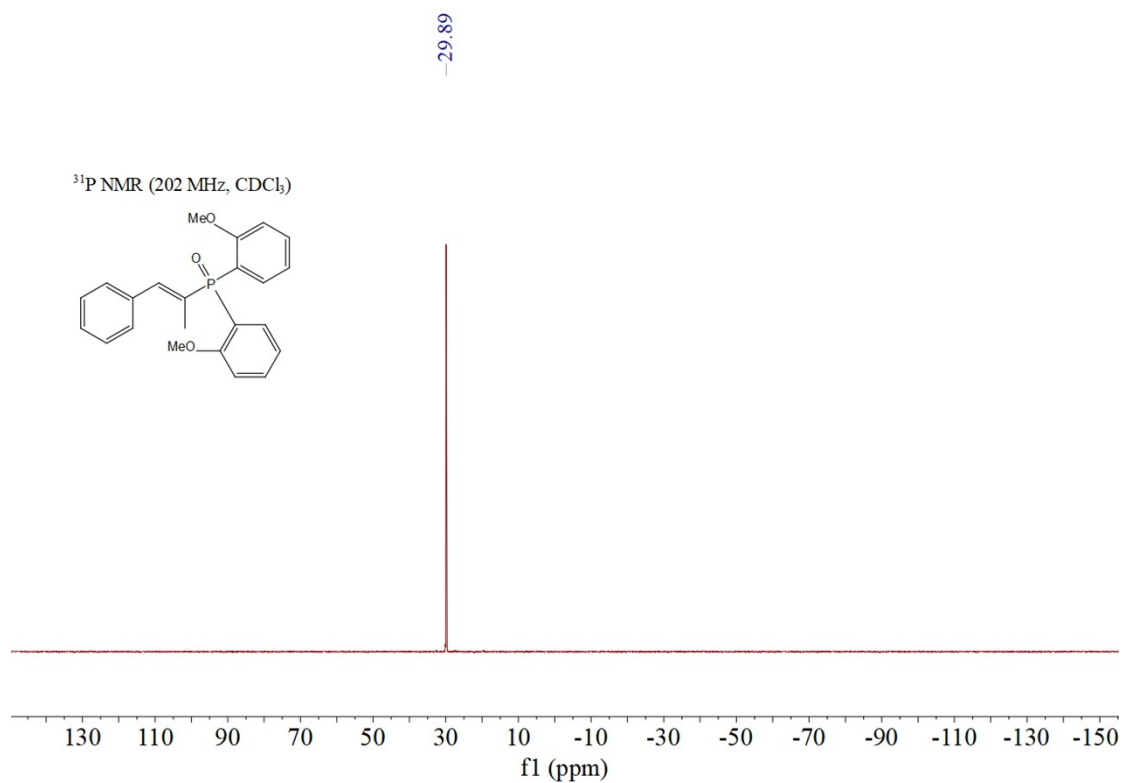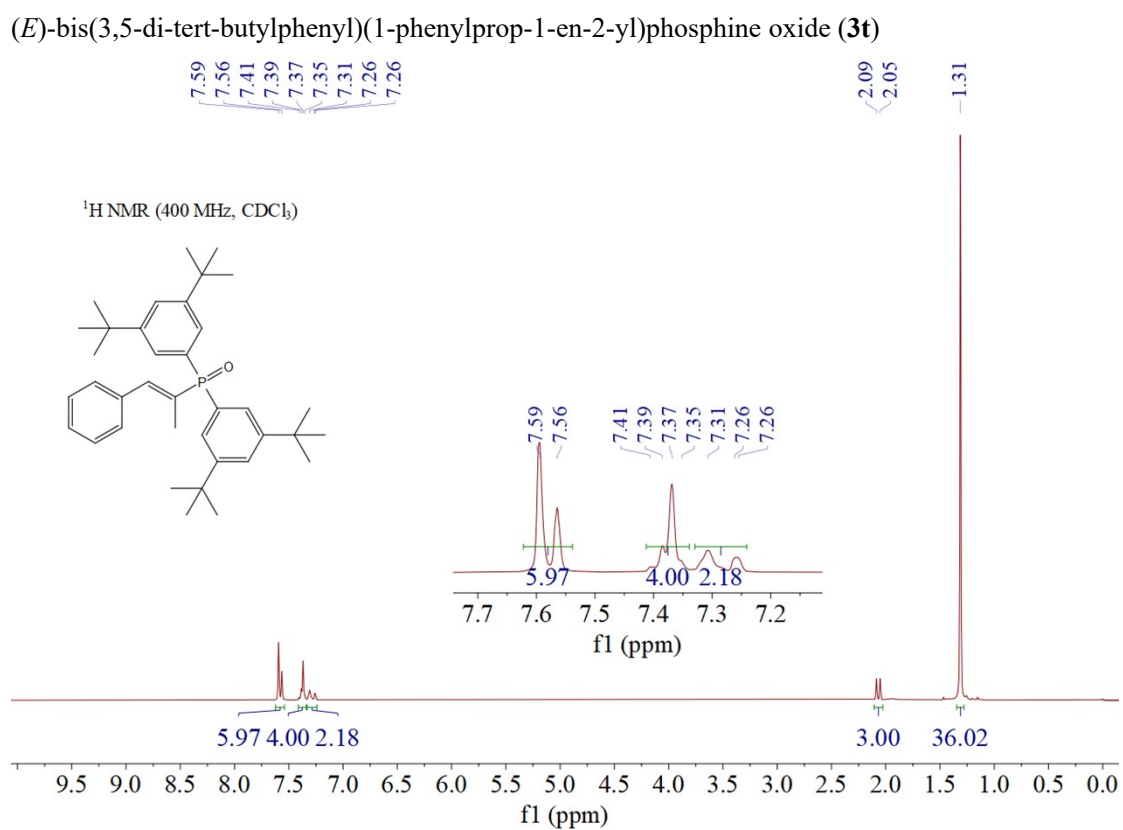

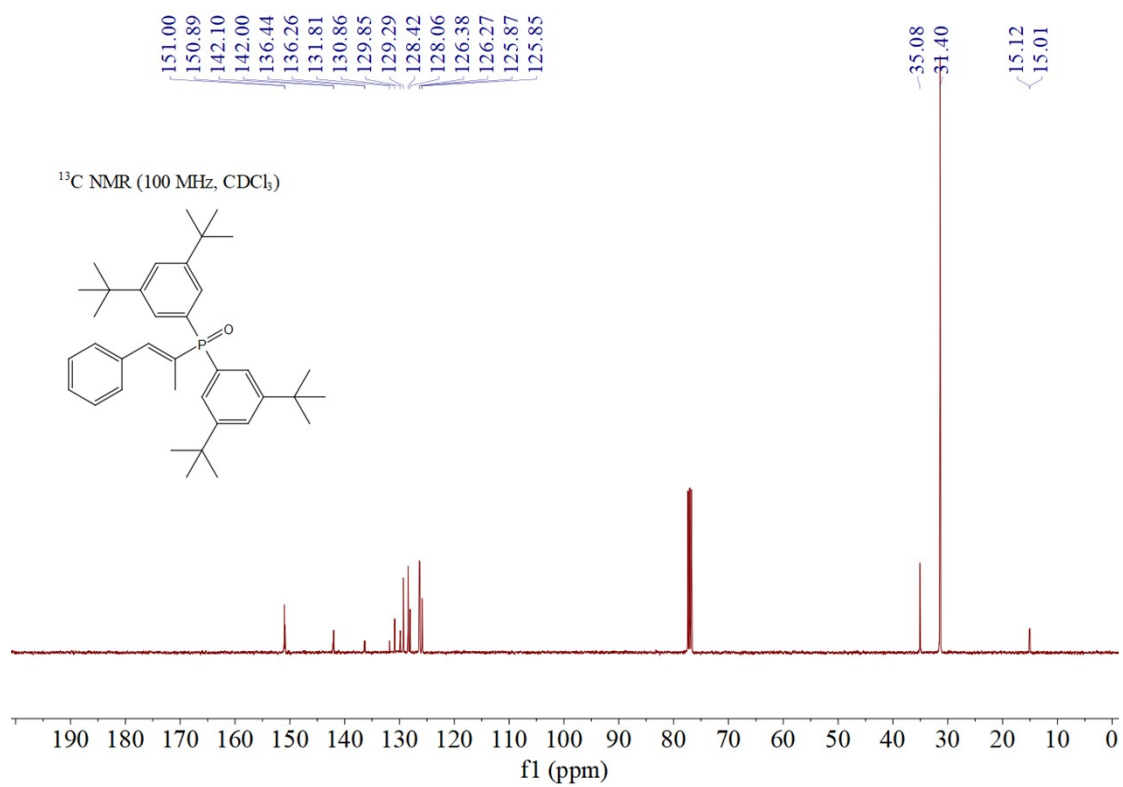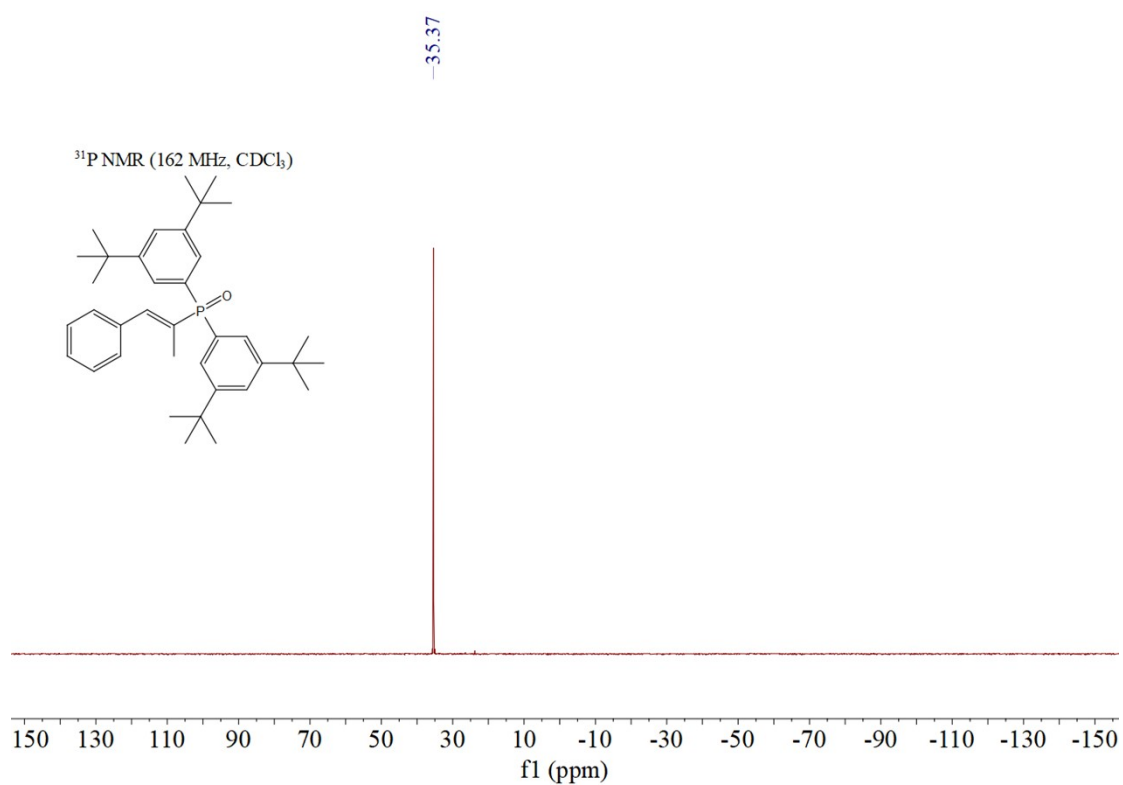

*(E)*-bis(3,5-dimethylphenyl)(1-phenylprop-1-en-2-yl)phosphine oxide (**3u**)

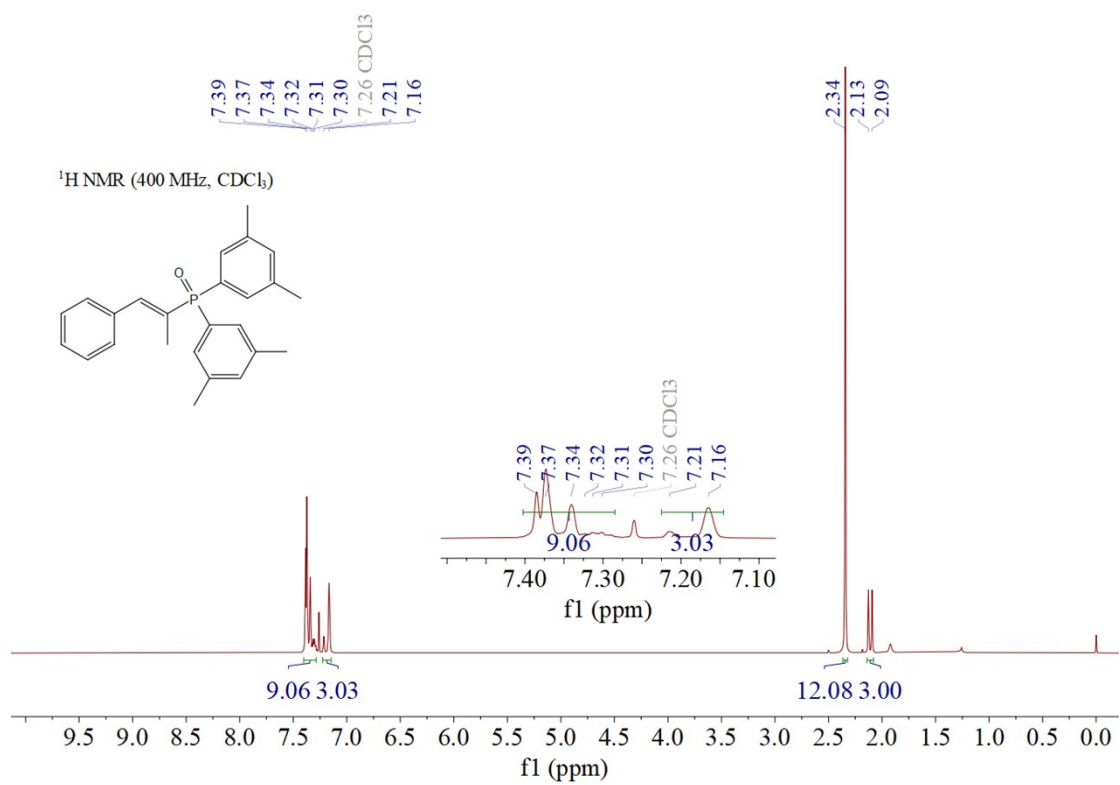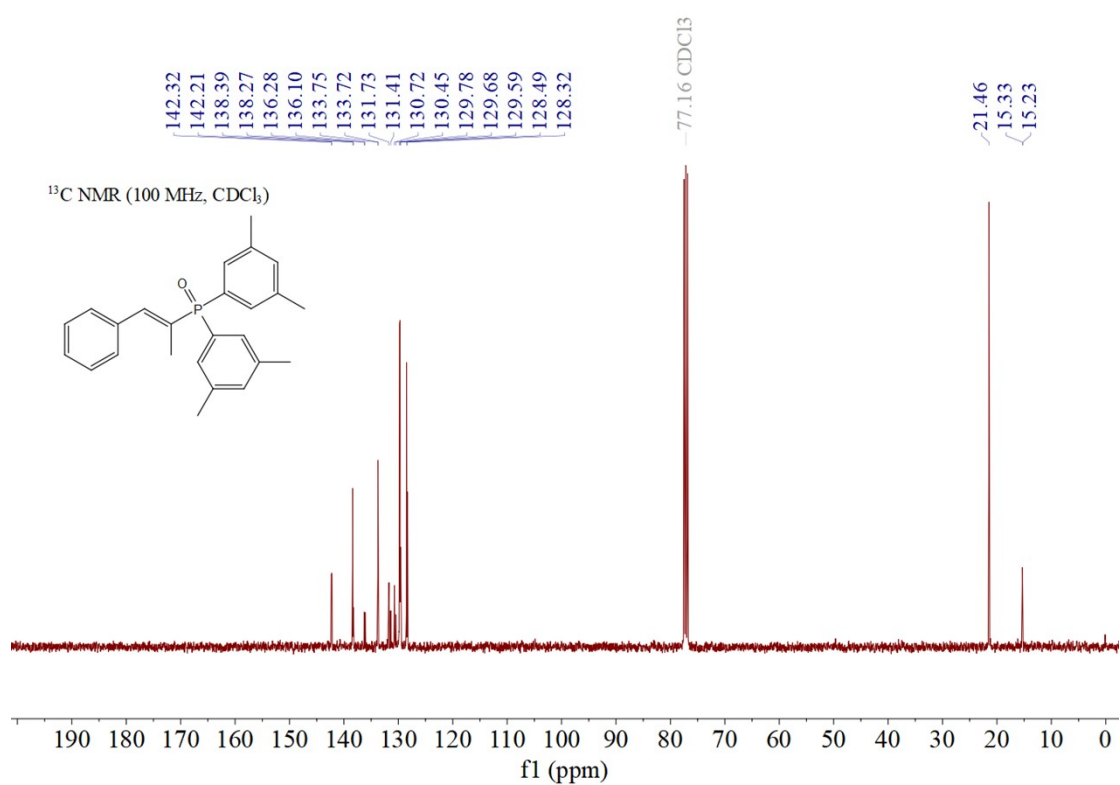

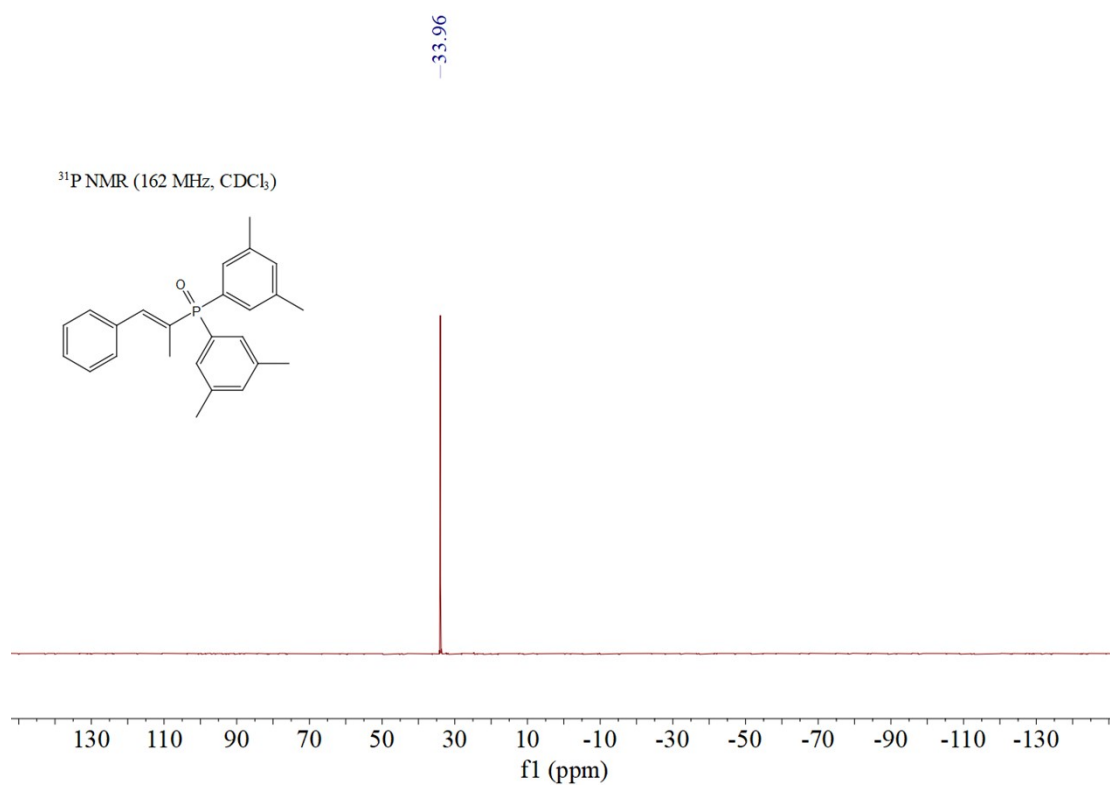

diethyl (*E*)-(1-phenylprop-1-en-2-yl)phosphonate (**3v**)

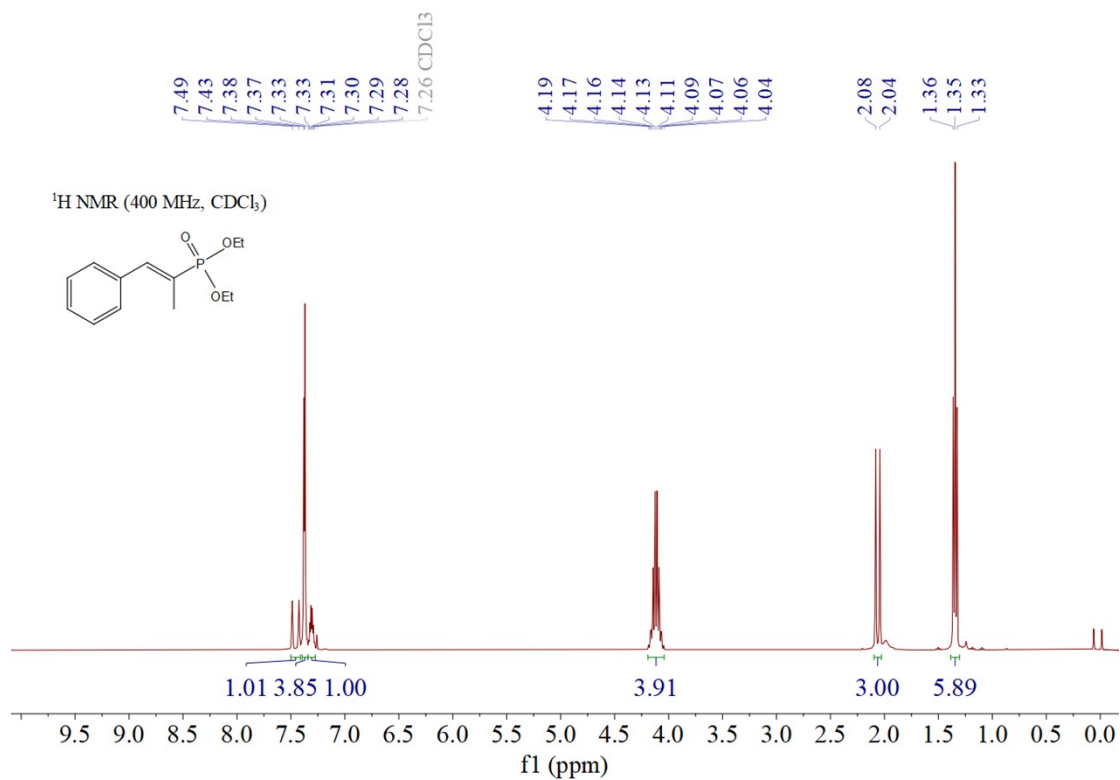



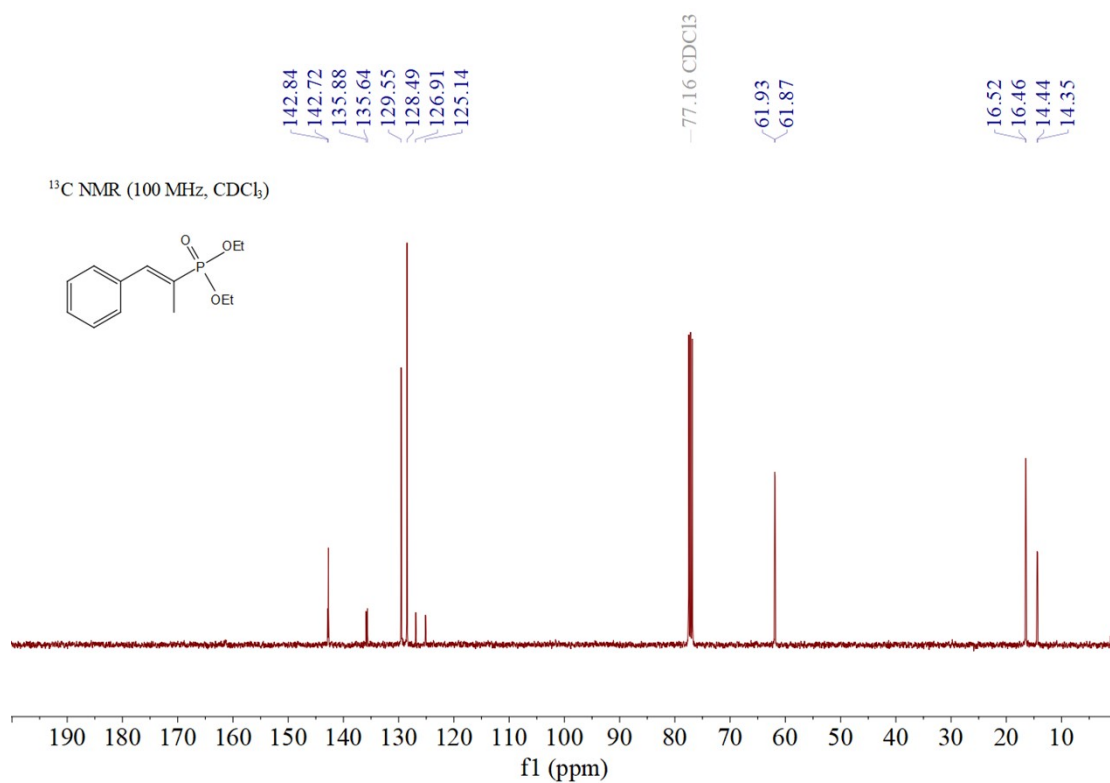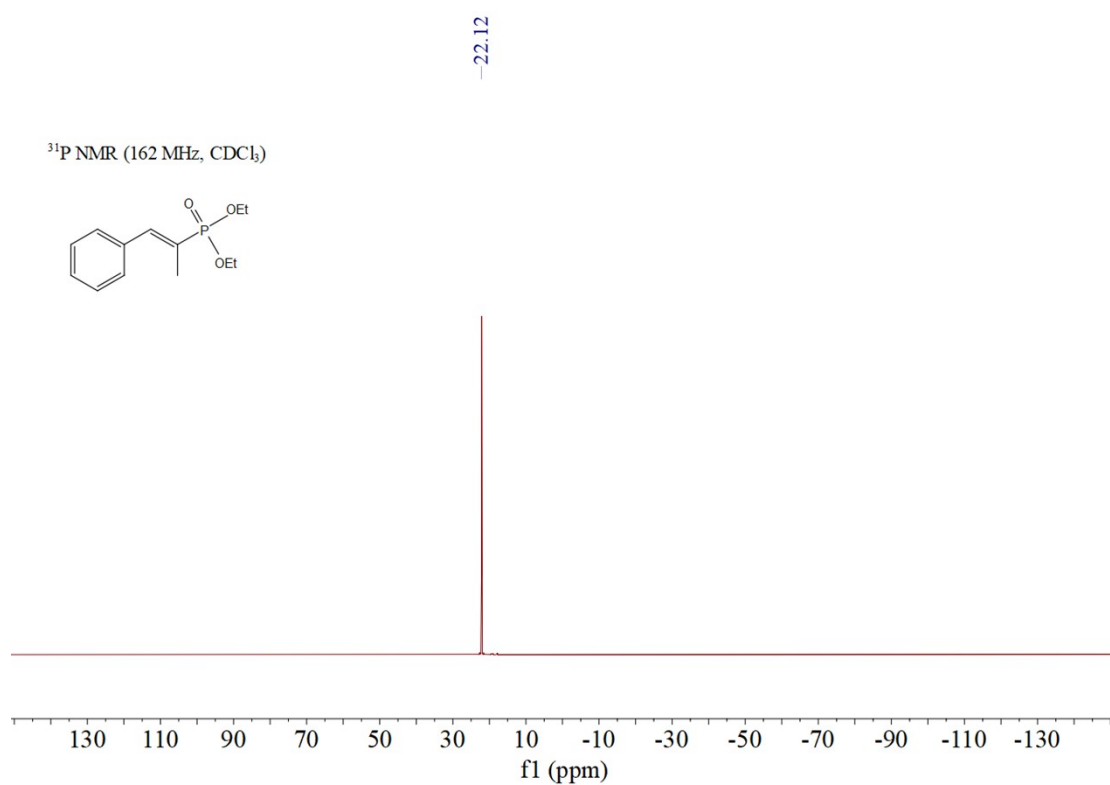

Supplement: d4ob01845a1.pdf [file d4ob01845a1.pdf]
